# Supplementary material for: Expeditious synthesis of bacterial, rare sugar building blocks to access the prokaryotic glycome
Source: Royal Society of Chemistry journal article supplement (doi:10.1039/c3ob40615f), 2013-01-01

## SUPPORTING INFORMATION

### Expeditious Synthesis of Bacterial, Rare Sugar Building Blocks to Access the Prokaryotic Glycome

Madhu Emmadi, and Suvarn S. Kulkarni\*

*Department of Chemistry, Indian Institute of Technology Bombay, Mumbai, India.*

Email: [suvarn@chem.iitb.ac.in](mailto:suvarn@chem.iitb.ac.in)

#### Table of Contents

|                                                                                 |     |
|---------------------------------------------------------------------------------|-----|
| <b>I. Experimental Procedures</b> .....                                         | S4  |
| Synthesis of compound <b>2a</b> .....                                           | S5  |
| Synthesis of compound <b>2b</b> .....                                           | S5  |
| Synthesis of compound <b>3a</b> .....                                           | S6  |
| Synthesis of compound <b>3b</b> .....                                           | S6  |
| Synthesis of compound <b>7</b> .....                                            | S7  |
| Synthesis of compound <b>9a</b> .....                                           | S8  |
| Synthesis of compound <b>9b</b> .....                                           | S8  |
| Synthesis of compound <b>11b<math>\alpha</math>/11b<math>\beta</math></b> ..... | S9  |
| Synthesis of compound <b>11a<math>\alpha</math></b> .....                       | S12 |
| Synthesis of compound <b>12</b> .....                                           | S13 |
| Synthesis of compound <b>14</b> .....                                           | S15 |
| Synthesis of compound <b>16</b> .....                                           | S15 |
| Synthesis of compound <b>17</b> .....                                           | S16 |
| Synthesis of compound <b>18</b> .....                                           | S17 |
| Synthesis of compound <b>19</b> .....                                           | S18 |
| <b>II. Spectra:</b>                                                             |     |
| <sup>1</sup> H NMR spectrum of compound <b>2a</b> .....                         | S21 |
| <sup>13</sup> C NMR spectrum of compound <b>2a</b> .....                        | S22 |
| <sup>1</sup> H- <sup>1</sup> H COSY spectrum of compound <b>2a</b> .....        | S23 |
| <sup>1</sup> H NMR spectrum of compound <b>2b</b> .....                         | S24 |
| <sup>13</sup> C NMR spectrum of compound <b>2b</b> .....                        | S25 |
| <sup>1</sup> H- <sup>1</sup> H COSY spectrum of compound <b>2b</b> .....        | S26 |

|                                                                                              |     |
|----------------------------------------------------------------------------------------------|-----|
| <sup>1</sup> H NMR spectrum of compound <b>3a</b> .....                                      | S27 |
| <sup>13</sup> C NMR spectrum of compound <b>3a</b> .....                                     | S28 |
| <sup>1</sup> H NMR spectrum of compound <b>3b</b> .....                                      | S29 |
| <sup>13</sup> C NMR spectrum of compound <b>3b</b> .....                                     | S30 |
| <sup>1</sup> H- <sup>1</sup> H COSY spectrum of compound <b>3b</b> .....                     | S31 |
| <sup>1</sup> H NMR spectrum of compound <b>4</b> .....                                       | S32 |
| <sup>13</sup> C NMR spectrum of compound <b>4</b> .....                                      | S33 |
| <sup>1</sup> H- <sup>1</sup> H COSY spectrum of compound <b>4</b> .....                      | S34 |
| <sup>1</sup> H NMR spectrum of compound <b>5</b> .....                                       | S35 |
| <sup>13</sup> C NMR spectrum of compound <b>5</b> .....                                      | S36 |
| <sup>1</sup> H- <sup>1</sup> H COSY spectrum of compound <b>5</b> .....                      | S37 |
| <sup>1</sup> H NMR spectrum of compound <b>6</b> .....                                       | S38 |
| <sup>13</sup> C NMR spectrum of compound <b>6</b> .....                                      | S39 |
| <sup>1</sup> H- <sup>1</sup> H COSY spectrum of compound <b>6</b> .....                      | S40 |
| <sup>1</sup> H NMR spectrum of compound <b>7</b> .....                                       | S41 |
| <sup>13</sup> C NMR spectrum of compound <b>7</b> .....                                      | S42 |
| <sup>1</sup> H- <sup>1</sup> H COSY spectrum of compound <b>7</b> .....                      | S43 |
| <sup>1</sup> H NMR spectrum of compound <b>9a</b> .....                                      | S44 |
| <sup>13</sup> C NMR spectrum of compound <b>9a</b> .....                                     | S45 |
| <sup>1</sup> H NMR spectrum of compound <b>9b</b> .....                                      | S46 |
| <sup>13</sup> C NMR spectrum of compound <b>9b</b> .....                                     | S47 |
| <sup>1</sup> H NMR spectrum of compound <b>11a<math>\alpha</math></b> .....                  | S48 |
| <sup>13</sup> C NMR spectrum of compound <b>11a<math>\alpha</math></b> .....                 | S49 |
| <sup>1</sup> H- <sup>1</sup> H COSY spectrum of compound <b>11a<math>\alpha</math></b> ..... | S50 |
| <sup>1</sup> H NMR spectrum of compound <b>11b<math>\alpha</math></b> .....                  | S51 |
| <sup>13</sup> C NMR spectrum of compound <b>11b<math>\alpha</math></b> .....                 | S52 |
| <sup>1</sup> H- <sup>1</sup> H COSY spectrum of compound <b>11b<math>\alpha</math></b> ..... | S53 |
| <sup>1</sup> H NMR spectrum of compound <b>11b<math>\beta</math></b> .....                   | S54 |
| <sup>13</sup> C NMR spectrum of compound <b>11b<math>\beta</math></b> .....                  | S55 |
| <sup>1</sup> H NMR spectrum of compound <b>12</b> .....                                      | S56 |
| <sup>13</sup> C NMR spectrum of compound <b>12</b> .....                                     | S57 |
| <sup>1</sup> H- <sup>1</sup> H COSY spectrum of compound <b>12</b> .....                     | S58 |
| <sup>1</sup> H NMR spectrum of compound <b>14</b> .....                                      | S59 |

|                                                                           |     |
|---------------------------------------------------------------------------|-----|
| <sup>13</sup> C NMR spectrum of compound <b>14</b> .....                  | S60 |
| <sup>1</sup> H NMR spectrum of compound <b>16</b> .....                   | S61 |
| <sup>13</sup> C NMR spectrum of compound <b>16</b> .....                  | S62 |
| <sup>1</sup> H- <sup>1</sup> H COSY spectrum of compound <b>16</b> .....  | S63 |
| <sup>1</sup> H NMR spectrum of compound <b>17</b> .....                   | S64 |
| <sup>13</sup> C NMR spectrum of compound <b>17</b> .....                  | S65 |
| <sup>1</sup> H- <sup>1</sup> H COSY spectrum of compound <b>17</b> .....  | S66 |
| <sup>1</sup> H NMR spectrum of compound <b>18</b> .....                   | S67 |
| <sup>13</sup> C NMR spectrum of compound <b>18</b> .....                  | S68 |
| <sup>1</sup> H- <sup>13</sup> C COSY spectrum of compound <b>18</b> ..... | S69 |
| <sup>1</sup> H- <sup>1</sup> H COSY spectrum of compound <b>18</b> .....  | S70 |
| <sup>1</sup> H NMR spectrum of compound <b>19</b> .....                   | S71 |
| <sup>13</sup> C NMR spectrum of compound <b>19</b> .....                  | S72 |
| ESI mass spectrum of compound <b>19</b> .....                             | S73 |
| <sup>1</sup> H NMR spectrum of per acetylation of <b>19</b> .....         | S74 |

## I. Experimental Procedures

### Synthesis of diols **2a** and **2b**:

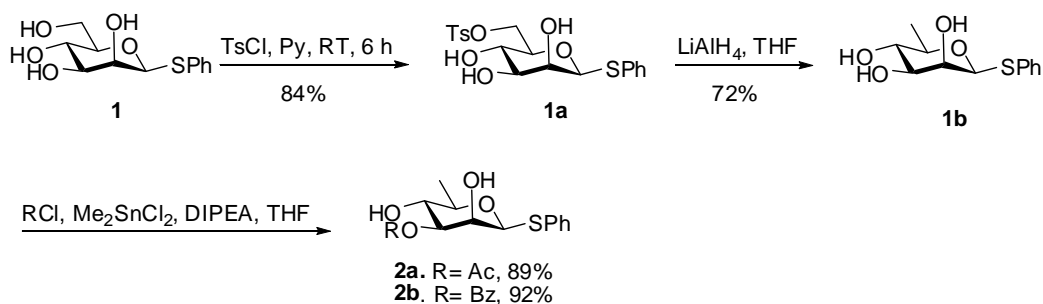

### Phenyl 6-*O*-Tosyloxy-1-thio- $\beta$ -D-mannopyranoside (**1a**):

To a cooled solution of phenyl-1-thio- $\beta$ -D-mannopyranoside **1** (9.5 g, 35.1 mmol) in pyridine (80 mL) was added a solution of TsCl (7.3 g, 38.6 mmol) in pyridine (54 mL) at 0 °C. The reaction mixture was gradually brought to rt and stirred for 6 h. After completion of starting material, solvents were evaporated under reduced pressure and the crude product was chromatographed (ethyl acetate/pet ether = 3/2, v/v) to obtain the desired product **1a** as a foam (12.5 g, 84%). <sup>1</sup>H NMR (400 MHz, CDCl<sub>3</sub>)  $\delta$  7.71 (d,  $J$  = 8.3 Hz, 2H, ArH), 7.36-7.33 (m, 2H, ArH), 7.18-7.16 (m, 6H, ArH), 4.81 (s, 1H, H-1), 4.34-4.32 (m, 2H), 4.22 (d,  $J$  = 3.0 Hz, 1H), 3.79 (t,  $J$  = 9.6 Hz, 1H, H-4), 3.68-3.65 (m, 1H), 3.50-3.45 (m, 1H), 2.29 (s, 3H); <sup>13</sup>C NMR (100 MHz, CDCl<sub>3</sub>)  $\delta$  144.9, 134.7, 132.4, 130.5, 130.0, 128.9, 128.0, 127.0, 87.0, 77.7, 74.7, 72.5, 69.7, 66.9, 21.6; HR-ESI-MS ( $m/z$ ): [M + Na]<sup>+</sup> calcd. for C<sub>19</sub>H<sub>22</sub>O<sub>7</sub>NaS<sub>2</sub>, 449.0705; found, 449.0746.

### Phenyl 6-Deoxy-1-thio- $\beta$ -D-mannopyranoside (**1b**):

A solution of **1a** (6.2 g, 14.6 mmol) in THF (110 mL) was added dropwise to a suspension of LAH (1.7 g, 43.8 mmol) in THF (38 mL) at 0 °C and the solution was refluxed for 2 h at 80 °C. After complete consumption of starting material the reaction mixture was brought to 0 °C and LAH was quenched with a drop wise addition of EtOAc followed by water, the so formed precipitate was dissolved in 2N H<sub>2</sub>SO<sub>4</sub> (100 mL) and extracted with EtOAc (300 mL x 2). Separated organic layer was dried over Na<sub>2</sub>SO<sub>4</sub>, concentrated and chromatographed (ethyl acetate/pet ether = 3/2, v/v) to obtain **1b** as a white solid (3.73 g, 72%). <sup>1</sup>H NMR (400 MHz, (CD<sub>3</sub>)<sub>2</sub>CO)  $\delta$  7.45-7.43

(m, 2H, ArH), 7.31-7.28 (m, 2H, ArH), 7.22-7.18 (m, 1H, ArH), 5.04 (s, 1H, H-1), 4.20 (bs, 3H, OH), 4.09 (s, 1H), 3.58 (dd,  $J = 9.0, 3.2$  Hz, 1H), 3.44 (t,  $J = 9.0$  Hz, 1H), 3.40-3.34 (m, 1H), 1.29 (d,  $J = 6.0$  Hz, 3H);  $^{13}\text{C}$  NMR (100 MHz,  $(\text{CD}_3)_2\text{CO}$ )  $\delta$  137.6, 130.0, 129.7, 127.0, 87.5, 77.0, 75.7, 73.8, 73.3, 18.4; HR-ESI-MS ( $m/z$ ):  $[\text{M} + \text{Na}]^+$  calcd. for  $\text{C}_{12}\text{H}_{16}\text{O}_4\text{NaS}$ , 279.0667; found, 279.0663.

**Phenyl 3-*O*-Acetyl-6-deoxy-1-thio- $\beta$ -D-mannopyranoside (2a):**

$\text{Me}_2\text{SnCl}_2$  (85 mg, 0.39 mmol) and DIPEA (2.7 mL, 15.6 mmol) were sequentially added to a stirred solution of **1b** (2.0 g, 7.8 mmol) in THF (40 mL). To this, AcCl (0.61 mL, 8.58 mmol) was added, after 1h the reaction mixture was quenched with 3% HCl and extracted with EtOAc (100 mL x 2). The combined organic layers were dried over  $\text{Na}_2\text{SO}_4$ , concentrated *in vacuo*, and purified by column chromatography (40% ethyl acetate: pet ether) to afford **2a** as a white solid (89%, 2.08 g).  $^1\text{H}$  NMR (400 MHz,  $\text{CDCl}_3$ )  $\delta$  7.48-7.44 (m, 2H, ArH), 7.31-7.24 (m, 3H, ArH), 4.88 (d,  $J = 0.8$  Hz, 1H, H-1), 4.75 (dd,  $J = 9.6, 3.2$  Hz 1H, H-3), 4.28 (dd,  $J = 3.2, 0.8$  Hz, 1H, H-2), 3.71 (t,  $J = 9.6$  Hz, 1H, H-4), 3.45-3.38 (m, 1H, H-5), 2.15 (s, 3H,  $\text{CH}_3$ ), 1.39 (d,  $J = 6.0$  Hz, 3H,  $\text{CH}_3$ );  $^{13}\text{C}$  NMR (100 MHz,  $\text{CDCl}_3$ ):  $\delta$  171.5, 133.8, 131.6, 129.2, 127.8, 87.0, 77.0, 76.9, 70.1, 70.5, 21.3, 18.0; HR-ESI-MS ( $m/z$ ):  $[\text{M} + \text{Na}]^+$  calcd. for  $\text{C}_{14}\text{H}_{18}\text{O}_5\text{NaS}$ , 321.0773; found, 321.0776.

**Phenyl 3-*O*-Benzoyl-6-deoxy-1-thio- $\beta$ -D-mannopyranoside (2b):**

$\text{Me}_2\text{SnCl}_2$  (85 mg, 0.39 mmol) and DIPEA (2.7 mL, 15.6 mmol) were added to a stirred solution of **1b** (2.0 g, 7.8 mmol) in THF (40 mL). To this, BzCl (1.0 mL, 8.58 mmol) was added, after 1h the reaction mixture was quenched with 3% HCl and extracted with EtOAc (100 mL x 2). The combined organic layers were dried over  $\text{Na}_2\text{SO}_4$ , concentrated *in vacuo*, and purified by column chromatography (25% ethyl acetate: pet ether) to afford **2b** as a white solid (92%, 2.6 g).  $^1\text{H}$  NMR (400 MHz,  $\text{CDCl}_3$ )  $\delta$  8.05-8.03 (m, 2H, ArH), 7.56-7.54 (m, 1H, ArH), 7.48-7.46 (m, 2H, ArH), 7.41-7.37 (m, 2H, ArH), 7.32-7.25 (m, 3H, ArH), 5.00 (dd,  $J = 9.6, 3.2$  Hz, 1H, H-3), 4.93 (d,  $J = 0.8$  Hz, 1H, H-1), 4.40 (dd,  $J = 3.2, 0.8$  Hz, 1H, H-2), 3.86 (t,  $J = 9.6$  Hz, 1H, H-4), 3.48-3.44 (m, 1H, H-5), 1.41 (d,  $J = 6.0$  Hz, 3H,  $\text{CH}_3$ );  $^{13}\text{C}$  NMR (100 MHz,  $\text{CDCl}_3$ ):  $\delta$  166.8, 134.0, 133.7, 131.5, 130.0, 129.4, 129.2, 128.6, 127.8, 87.1,

77.6, 76.8, 71.1, 70.7, 18.1; HR-ESI-MS ( $m/z$ ):  $[M + Na]^+$  calcd. for  $C_{19}H_{20}O_5NaS$ , 383.0929; found, 383.0941.

**Phenyl 3-*O*-Acetyl-2,4-diazido-2,4,6-trideoxy-1-thio- $\beta$ -D-galactopyranoside (3a):**

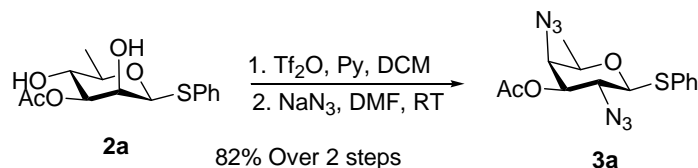

Trifluoromethanesulfonic anhydride (6.1 mL, 36.9 mmol) was added dropwise at  $-10$  °C to a stirred solution of **2a** (1.8 g, 6.0 mmol) and pyridine (6.3 mL, 78.4 mmol) in  $CH_2Cl_2$  (55 mL) and this solution was gradually brought to  $10$  °C over 2 h. After complete consumption of starting material, as indicated by TLC, the reaction mixture was concentrated *in vacuo* and the crude product was used for the next step without any purification.

The crude product which was obtained in the above step was dissolved in DMF (40 mL) and to this,  $NaN_3$  (3.9 g, 60 mmol) was added. The reaction mixture was stirred at rt for 8 h and then it was diluted with EtOAc (50 mL) and washed with water. Separated aqueous layer was washed with EtOAc (50 mL x 2). The combined organic layers were dried over  $Na_2SO_4$  and concentrated *in vacuo*. The desired product was purified by column chromatography (10% ethyl acetate: pet ether) to obtain **3a** as a pale yellowish liquid (1.72 g, 82%).  $^1H$  NMR (400 MHz,  $CDCl_3$ )  $\delta$  7.60-7.58 (m, 2H, ArH), 7.34-7.33 (m, 3H, ArH), 4.90 (dd,  $J = 10.0, 3.4$  Hz, 1H, H-3), 4.40 (d,  $J = 10.0$  Hz, 1H, H-1), 3.82 (d,  $J = 3.4$  Hz, 1H, H-4), 3.70-3.65 (m, 2H, H-2 & H-5), 2.16 (s, 3H,  $CH_3$ ), 1.35 (d,  $J = 6.2$  Hz, 3H,  $CH_3$ );  $^{13}C$  NMR (100 MHz,  $CDCl_3$ ):  $\delta$  170.1, 133.5, 131.2, 129.2, 128.6, 86.5, 75.5, 73.4, 63.0, 59.3, 20.7, 17.8; HR-ESI-MS ( $m/z$ ):  $[M + Na]^+$  calcd. for  $C_{14}H_{16}N_6O_3NaS$ , 371.0902; found, 371.0905.

**Phenyl 2,4-Diazido-3-*O*-benzoyl-2,4,6-trideoxy-1-thio- $\beta$ -D-galactopyranoside (3b):**

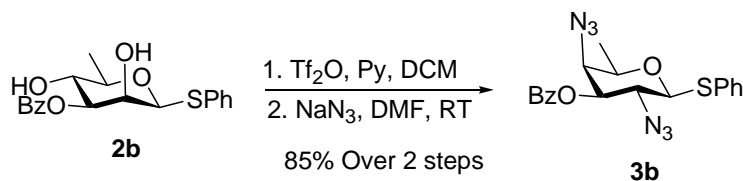

Trifluoromethanesulfonic anhydride (3.4 mL, 20.0 mmol) was added drop wise at -10 °C to a stirred solution of **2b** (1.2 g, 3.3 mmol) and pyridine (3.5 mL, 43.1 mmol) in CH<sub>2</sub>Cl<sub>2</sub> (42 mL) and the solution was gradually brought to 10 °C over 2 h. After complete consumption of starting material, reaction mixture was concentrated *in vacuo* and the crude product was used for the next step without any purification.

The crude product which was obtained in the above step was dissolved in DMF (28 mL) and to this, NaN<sub>3</sub> (2.15 g, 33.2 mmol) was added. This reaction mixture was stirred at rt for 8 h and then it was diluted with EtOAc (50 mL) and washed with water. Separated aqueous layer was washed with EtOAc (50 mL x 2). The combined organic layers were dried over Na<sub>2</sub>SO<sub>4</sub> and concentrated *in vacuo*. The desired product was purified by column chromatography (10% ethyl acetate: pet ether) to obtain **3b** as a pale yellowish liquid (1.15 g, 85%). <sup>1</sup>H NMR (400 MHz, CDCl<sub>3</sub>) δ 8.10-8.07 (m, 2H, ArH), 7.64-7.59 (m, 3H, ArH), 7.50-7.46 (m, 2H, ArH), 7.38-7.35 (m, 3H, ArH), 5.18 (dd, *J* = 10.0, 3.5 Hz 1H, H-3), 4.49 (d, *J* = 10.0 Hz, 1H, H-1), 3.85 (dd, *J* = 3.5, 1.0 Hz, 1H, H-4), 3.80-3.77 (m, 2H, H-2 & H-5), 1.39 (d, *J* = 6.3 Hz, 3H, CH<sub>3</sub>); <sup>13</sup>C NMR (100 MHz, CDCl<sub>3</sub>): δ 165.6, 133.9, 133.4, 131.2, 130.1, 129.1, 128.7, 128.5, 128.4, 86.6, 75.8, 73.6, 63.1, 59.8, 17.8; HR-ESI-MS (*m/z*): [M + Na]<sup>+</sup> calcd. for C<sub>19</sub>H<sub>18</sub>N<sub>6</sub>O<sub>3</sub>NaS, 433.1059; found, 433.1039.

#### Phenyl 2,4-Diazido-3-*O*-benzoyl-2,4,6-trideoxy-1-thio-β-D-glucopyranoside (**7**):

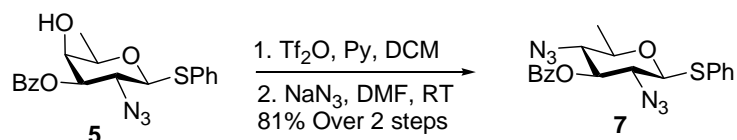

Trifluoromethanesulfonic anhydride (30 μL, 0.18 mmol) was added drop wise at -10 °C to a stirred solution of **5** (58 mg, 0.15 mmol) and pyridine (75 μL, 0.9 mmol) in CH<sub>2</sub>Cl<sub>2</sub> (1 mL) and this solution was gradually brought to 10 °C over 2 h. After complete consumption of starting material, reaction mixture was concentrated *in vacuo* and the crude product was used for the next step without purification.

The crude product which was obtained in above step was dissolved in DMF (1.2 mL) and to this, NaN<sub>3</sub> (0.1 g, 1.5 mmol) was added. The reaction mixture was stirred at rt for 10 h and then it was diluted with EtOAc and washed with water. Separated organic layer was dried over Na<sub>2</sub>SO<sub>4</sub> and concentrated *in vacuo*. The crude product was purified by column chromatography (10% ethyl acetate: pet ether) to

afford **7** as a white solid (51 mg, 81%).  $^1\text{H}$  NMR (400 MHz,  $\text{CDCl}_3$ )  $\delta$  8.08-8.06 (m, 2H, ArH), 7.63-7.59 (m, 3H, ArH), 7.49-7.45 (m, 2H, ArH), 7.38-7.35 (m, 3H, ArH), 5.28 (t,  $J = 10.0$  Hz, 1H, H-3), 4.57 (d,  $J = 10.0$  Hz, 1H, H-1), 3.49-3.44 (m, 2H, H-2 & H-5), 3.29 (t,  $J = 10.0$  Hz, 1H, H-4), 1.45 (d,  $J = 6.2$  Hz, 3H,  $\text{CH}_3$ );  $^{13}\text{C}$  NMR (100 MHz,  $\text{CDCl}_3$ )  $\delta$  165.5, 133.9, 133.8, 130.9, 130.1, 129.3, 128.9, 128.8, 128.7, 86.3, 75.3, 75.1, 65.9, 63.6, 18.8; HR-ESI-MS ( $m/z$ ):  $[\text{M} + \text{Na}]^+$  calcd. for  $\text{C}_{19}\text{H}_{18}\text{N}_6\text{O}_3\text{NaS}$ , 433.1059; found, 433.1055.

### 3-*O*-Acetyl-2,4-diazido-2,4,6-trideoxy- $\alpha$ -D-galactopyranoside

#### Trichloroacetimidate (**9a**):

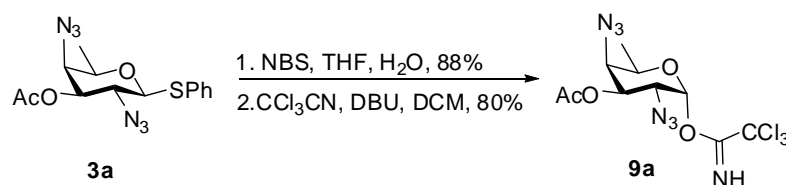

NBS (1.0 g, 6.0 mmol) was added at 0 °C to a cooled solution of **3a** (0.7 g, 2.0 mmol) in THF:  $\text{H}_2\text{O}$  (30 mL, 4:1). After 10 min. reaction mixture was brought to rt and stirred for 30 min. Then solvents were evaporated and the crude product was purified by column chromatography on silica gel (20% ethyl acetate: pet ether) to afford the desired hemiacetal as a viscous liquid (0.45 g, 88%).

DBU (70  $\mu\text{L}$ , 0.47 mmol) was added at -5 °C to the solution of hemiacetal (0.4 g, 1.56 mmol) and  $\text{Cl}_3\text{CCN}$  (1.9 mL, 19.0 mmol) in  $\text{CH}_2\text{Cl}_2$  (10 mL) and the reaction mixture was stirred at the same temperature for 1 h. The mixture was concentrated under reduced pressure and the crude product was purified by column chromatography on silica gel (10% ethyl acetate: pet ether) to afford **9a** as a white foam (0.5 g, 80%).  $^1\text{H}$  NMR (400 MHz,  $\text{CDCl}_3$ )  $\delta$  8.73 (s, 1H, NH), 6.39 (d,  $J = 3.6$  Hz, 1H, H-1), 5.39 (dd,  $J = 10, 3.4$  Hz, 1H, H-3), 4.27 (q,  $J = 6.4$  Hz, 1H, H-5), 4.10-4.03 (m, 2H, H-2 & H-4), 2.22 (s, 3H,  $\text{CH}_3$ ), 1.29 (d,  $J = 6.4$  Hz, 3H);  $^{13}\text{C}$  NMR (100 MHz,  $\text{CDCl}_3$ ):  $\delta$  170.3, 160.8, 94.8, 90.9, 71.6, 67.6, 63.5, 57.1, 20.8, 17.3.

### 3-*O*-Benzoyl-2,4-diazido-2,4,6-trideoxy- $\alpha$ -D-galactopyranoside

#### Trichloroacetimidate (**9b**):

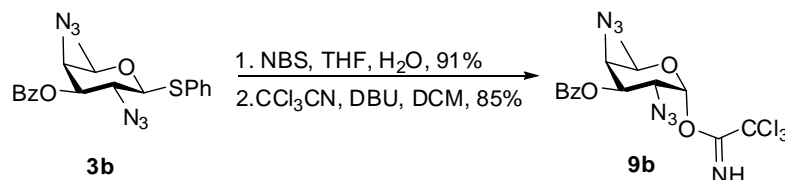



NBS (0.34 g, 1.9 mmol) was added at 0 °C to a cooled solution of **3b** (0.26 g, 0.64 mmol) in THF: H<sub>2</sub>O (9.5 mL, 4:1). After 10 min. reaction mixture was brought to rt and stirred for 30 min. Then solvents were evaporated and the crude product was purified by column chromatography on silica gel (20% ethyl acetate: pet ether) to afford the desired hemiacetal as a viscous liquid (0.18 g, 91%).

DBU (26 μL, 0.17 mmol) was added at -5 °C to the solution of hemiacetal (0.18 g, 0.57 mmol) and Cl<sub>3</sub>CCN (0.7 mL, 7.0 mmol) in CH<sub>2</sub>Cl<sub>2</sub> (3.5 mL) and the reaction mixture was stirred at the same temperature for 1 h. The mixture was concentrated under reduced pressure and the crude product was purified by column chromatography on silica gel (10% ethyl acetate: pet ether) to afford **9b** as a white foam (0.22 g, 85%). <sup>1</sup>H NMR (400 MHz, CDCl<sub>3</sub>) δ 8.76 (s, 1H, NH), 8.12 (d, *J* = 7.8 Hz, 2H, ArH), 7.63 (t, *J* = 7.8 Hz, 1H, ArH), 7.52 (t, *J* = 7.8 Hz, 2H, ArH), 6.47 (d, *J* = 3.6 Hz, 1H, H-1), 5.67 (dd, *J* = 10.8, 3.4 Hz, 1H, H-3), 4.38 (q, *J* = 6.4 Hz, 1H, H-5), 4.23 (dd, *J* = 10.8, 3.6 Hz, 1H, H-2), 4.18-4.17 (m, 1H, H-4), 1.33 (d, *J* = 6.4 Hz, 3H, CH<sub>3</sub>); <sup>13</sup>C NMR (100 MHz, CDCl<sub>3</sub>): δ 165.8, 160.8, 134.1, 130.2, 128.8, 128.5, 94.9, 90.9, 71.7, 67.9, 63.8, 57.6, 17.3.

## Stereoselective glycosylation of L-serine acceptor **10** with various donors:

### A. Thioglycoside **3b** using Ph<sub>2</sub>SO/Tf<sub>2</sub>O as promoter:

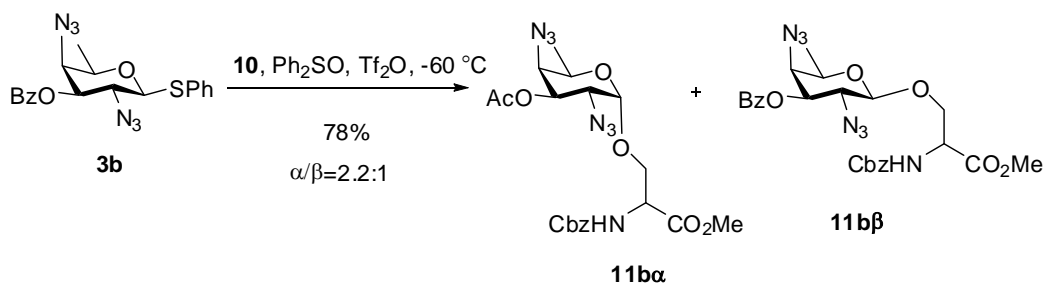

Tf<sub>2</sub>O (6 μL, 0.34 mmol) was added at -60 °C to a cooled solution of **3b** (0.1 g, 0.24 mmol) and Ph<sub>2</sub>SO (0.15 g, 0.68 mmol) in CH<sub>2</sub>Cl<sub>2</sub> (10 mL). After 10 min. amino acid (0.12 g, 0.48 mmol) in DCM (3 mL) added slowly and after stirring the reaction mixture at the same temperature for 1 h, diluted with DCM and washed with aq. NaHCO<sub>3</sub> and brine. Separated organic layer dried over Na<sub>2</sub>SO<sub>4</sub>, concentrated and

chromatographed to yield the desired product **11b** as white solid (0.11 g, 78%,  $\alpha/\beta = 2.2:1$ );  $^1\text{H}$  NMR (400 MHz,  $\text{CDCl}_3$ )  $\delta$  (for  $\alpha$ -isomer **11b $\alpha$** ) 8.10 (d,  $J = 7.2$  Hz, 2H, ArH), 7.63-7.59 (m, 1H, ArH), 7.50-7.46 (m, 2H, ArH), 7.38-7.32 (m, 5H, ArH), 5.82 (d,  $J = 8.2$  Hz, 1H, NH), 5.57 (dd,  $J = 10.0, 3.0$  Hz, 1H, H-3), 5.18 (s, 2H,  $\text{CH}_2$  of Cbz), 4.91 (d,  $J = 3.6$  Hz, 1H, H-1), 4.57-4.55 (m, 1H, -CH), 4.15-3.98 (m, 4H, H-4, H-5,  $\text{CH}_2$ ), 3.79 (s, 3H,  $\text{CH}_3$ ), 3.69 (dd,  $J = 10.0, 3.6$  Hz, 1H, H-2), 1.25 (d,  $J = 6.4$  Hz, 3H,  $\text{CH}_3$ );  $^{13}\text{C}$  NMR (100 MHz,  $\text{CDCl}_3$ )  $\delta$  170.3, 165.7, 156.0, 134.0, 130.2, 128.8, 128.7, 128.4, 128.3, 99.3, 70.8, 69.5, 67.3, 65.6, 64.2, 57.8, 54.5, 53.1, 17.2.

$^1\text{H}$  NMR (400 MHz,  $\text{CDCl}_3$ )  $\delta$  (for  $\beta$ -isomer **11b $\beta$** ) 8.09 (d,  $J = 7.8$  Hz, 2H, ArH), 7.63-7.60 (m, 1H, ArH), 7.50-7.46 (m, 2H, ArH), 7.36-7.30 (m, 5H, ArH), 5.80 (d,  $J = 8.2$  Hz, 1H, NH), 5.13 (s, 2H,  $\text{CH}_2$  of Cbz), 5.07 (dd,  $J = 10.4, 3.6$  Hz, 1H, H-3), 4.56-4.54 (m, 1H, -CH), 4.35-4.32 (m, 1H,  $-\text{CH}_2$ ), 4.30 (d,  $J = 8.0$  Hz, 1H, H-1), 3.92-3.80 (m, 3H, H-2, H-4, 1H of  $-\text{CH}_2$ ), 3.77 (s, 3H,  $\text{CH}_3$ ), 3.66 (q,  $J = 6.4$  Hz, H-5), 1.33 (d,  $J = 6.4$  Hz, 3H,  $\text{CH}_3$ );  $^{13}\text{C}$  NMR (100 MHz,  $\text{CDCl}_3$ )  $\delta$  170.1, 165.6, 136.4, 134.0, 130.1, 128.7, 128.64, 128.60, 128.2, 128.1, 102.6, 73.5, 69.7, 69.5, 67.1, 63.0, 61.0, 54.3, 52.9, 17.3; HR-ESI-MS ( $m/z$ ):  $[\text{M} + \text{Na}]^+$  calcd. for  $\text{C}_{20}\text{H}_{25}\text{N}_7\text{O}_8\text{Na}$ , 576.5137; found, 576.5129.

### B. Glycosyl bromide **8** using AgOTf as promoter:

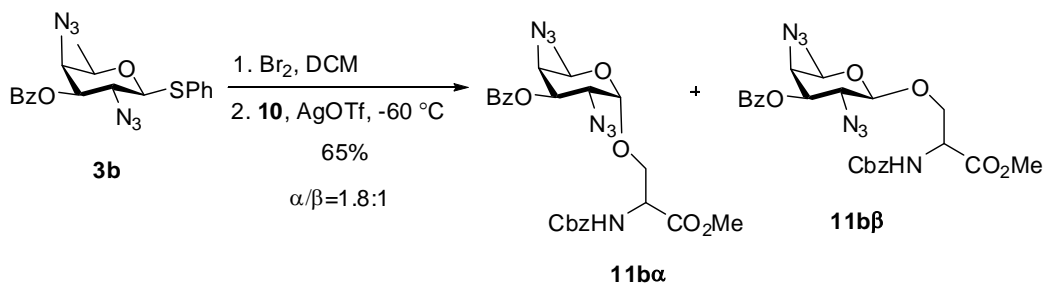

Bromine (0.08 mL, 1.5 mmol) was added to a solution of **3b** (0.28 g, 0.68 mmol) in  $\text{CH}_2\text{Cl}_2$  (10 mL). After 1 h, toluene was added, the mixture was concentrated, and the residue was co-evaporated twice with toluene.

The residue which was obtained after solvents removal was dissolved in  $\text{CH}_2\text{Cl}_2$  (3 mL) and added to a solution of aminoacid **10** (0.10 g, 0.4 mmol) in  $\text{CH}_2\text{Cl}_2$  (5 mL) containing molecular sieves. The mixture was stirred under nitrogen for 30 min at rt, after which the temperature was lowered to  $-50^\circ\text{C}$  and silver triflate (0.19 g, 0.75 mmol) was added. After 2 h triethylamine was added, and the stirring

was continued for 10 min. The mixture was diluted with CH<sub>2</sub>Cl<sub>2</sub>, filtered through celite, and concentrated. The residue was purified by silica gel chromatography to give the desired product 11b as a white solid (0.1 g, 65%,  $\alpha/\beta = 1.8:1$ )

### C. Glycosyl bromide **8** using AgClO<sub>4</sub> as promoter:

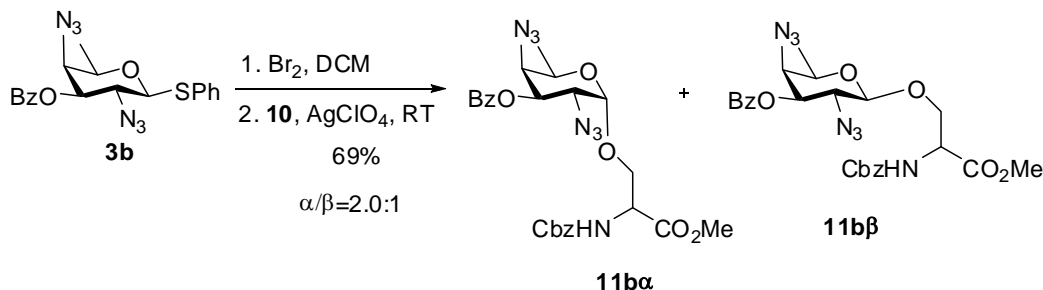

Bromine (0.07 mL, 1.4 mmol) was added to a solution of **3b** (0.24 g, 0.64 mmol) in CH<sub>2</sub>Cl<sub>2</sub> (8 mL). After 1 h, toluene was added, the mixture was concentrated, and the residue was co-evaporated twice with toluene.

A premixed solution of aminoacid acceptor **10** (0.10 g, 0.38 mmol) and glycosyl bromide **8** in CH<sub>2</sub>Cl<sub>2</sub> (5 mL) was added to a solution of AgClO<sub>4</sub> (0.16 g, 0.76 mmol) and MS in CH<sub>2</sub>Cl<sub>2</sub> (6 mL) over a period of 20 min. After 8 h, triethylamine was added, and the stirring was continued for 10 min. The mixture was diluted with CH<sub>2</sub>Cl<sub>2</sub>, filtered through celite, and concentrated. The residue was purified by silica gel chromatography to give the desired product 11b as a white solid (0.1 g, 69%,  $\alpha/\beta = 2.0:1$ )

### D. Glycosyl bromide **8** using TBAI as promoter:

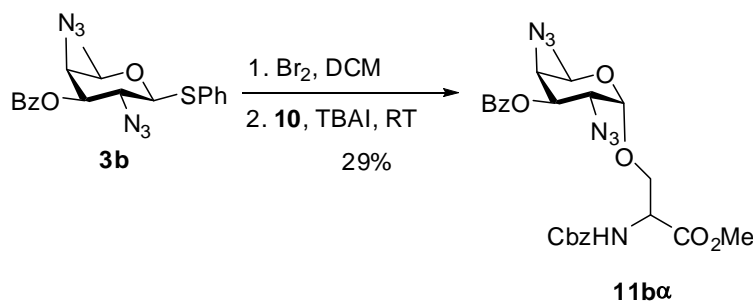

Bromine (35  $\mu$ L, 0.66 mmol) was added to a solution of **3b** (0.12 g, 0.29 mmol) in CH<sub>2</sub>Cl<sub>2</sub> (4 mL). After 1 h, toluene was added, the mixture was concentrated, and the residue was co-evaporated twice with toluene.

The residue in CH<sub>2</sub>Cl<sub>2</sub> (1.5 mL) was added to a solution of aminoacid acceptor **10** (0.11 g, 0.4 mmol), MS, TBAI (0.33 g, 0.87 mmol), and DIPEA (40  $\mu$ L, 0.33

mmol) in CH<sub>2</sub>Cl<sub>2</sub> (2 mL). After 6 h the mixture was diluted with CH<sub>2</sub>Cl<sub>2</sub>, filtered through celite, and concentrated. The residue was purified by silica gel chromatography to give the desired product **11b** as a white solid (0.05 g, 29%, only  $\alpha$ -isomer).

#### E. Imidate **9a/9b** using TMSOTf as promoter:

*N*-(Benzyloxycarbonyl)-*O*-(3-*O*-acetyl-2,4-diazido-2,4,6-trideoxy- $\alpha$ -D-galactopyranosyl)-L-serine methylester (**11a**):

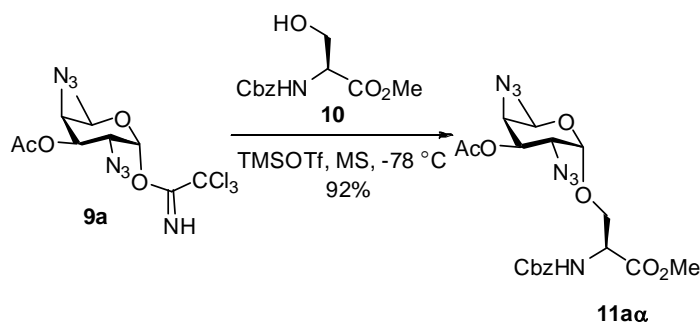

TMSOTf (75  $\mu$ L, 0.38 mmol, diluted with 1.2 mL of THF) was added drop wise to a suspension of imidate **9a** (0.3 g, 0.76 mmol), the aminoacid derivative **10** (0.29 g, 1.1 mmol) and 3 Å MS (1.0 g) in THF (6.5 mL) at -78 °C and the reaction mixture was allowed to stir at the same temperature for 4 h. The mixture was diluted with CH<sub>2</sub>Cl<sub>2</sub>, filtered through celite, and concentrated. The residue was purified by silica gel chromatography (20% ethyl acetate: pet ether) to give the desired product **11a $\alpha$**  as a viscous liquid (0.35 g, 92%, only  $\alpha$ -isomer). <sup>1</sup>H NMR (400 MHz, CDCl<sub>3</sub>)  $\delta$  7.36-7.30 (m, 5H, ArH), 5.85 (d,  $J$  = 8.0 Hz, 1H, NH), 5.28 (dd,  $J$  = 10.0, 3.4 Hz, 1H, H-3), 5.12 (s, 2H, CH<sub>2</sub> of Cbz), 4.83 (d,  $J$  = 3.6 Hz, 1H, H-1), 4.55-4.52 (m, 1H, -CH), 4.05-4.00 (m, 3H, H-5 & -CH<sub>2</sub>), 3.87 (d,  $J$  = 3.4 Hz, 1H, H-4), 3.77 (s, 3H, CH<sub>3</sub>), 3.60 (dd,  $J$  = 10.0, 3.6 Hz, 1H, H-2), 2.16 (s, 3H, CH<sub>3</sub>), 1.20 (d,  $J$  = 6.4 Hz, 3H, CH<sub>3</sub>); <sup>13</sup>C NMR (100 MHz, CDCl<sub>3</sub>)  $\delta$  170.3, 170.2, 156.0, 136.2, 128.7, 128.4, 128.2, 99.0, 77.4, 70.6, 69.3, 67.3, 65.3, 63.9, 57.3, 54.4, 53.0, 20.7, 17.1; HR-ESI-MS ( $m/z$ ): [M + Na]<sup>+</sup> calcd. for C<sub>20</sub>H<sub>25</sub>N<sub>7</sub>O<sub>8</sub>Na, 514.1662; found, 514.1635.

***N*-(Benzyloxycarbonyl)-*O*-(3-*O*-benzoyl-2,4-diazido-2,4,6-trideoxy- $\alpha$ -D-galactopyranosyl)-*L*-serine methylester (**11 $\alpha$** ):**

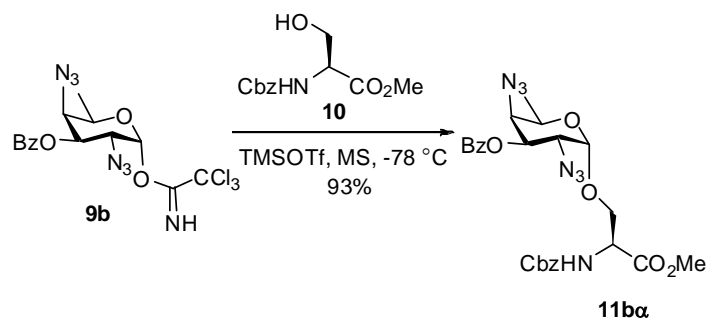

TMSOTf (29  $\mu$ L, 0.14 mmol, diluted with 0.5 mL of THF) was added drop wise to a suspension of imidate **9b** (0.13 g, 0.29 mmol), the aminoacid derivative **10** (0.11 g, 0.43 mmol) and 3 Å MS (0.4 g) in THF (2.5 mL) at -78 °C and the reaction mixture was allowed to stir at the same temperature for 4 h. The mixture was diluted with CH<sub>2</sub>Cl<sub>2</sub>, filtered through celite, and concentrated. The residue was purified by silica gel chromatography (20% ethyl acetate: pet ether) to give the desired product **11 $\alpha$**  as a viscous liquid (0.15 g, 93%, only  $\alpha$ -isomer).

***N*-(Benzyloxycarbonyl)-*O*-(2,4-diazido-2,4,6-trideoxy- $\alpha$ -D-galactopyranosyl)-*L*-serine methylester (**12**):**

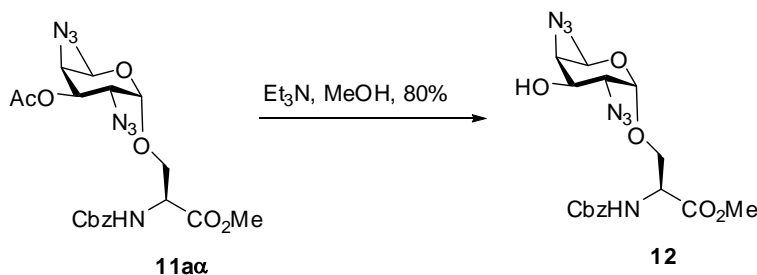

Et<sub>3</sub>N (1 mL) was added to a clear solution of **11 $\alpha$**  (0.2 g, 0.4 mmol) in MeOH (4 mL) and the reaction mixture kept for stirring at rt overnight in dark. After complete consumption of starting material solvents were removed *in vacuo* and the crude product was chromatographed by silica gel column chromatography (30% ethyl acetate: pet ether) to afford **12** as a viscous liquid (0.152 g, 80%). <sup>1</sup>H NMR (400 MHz, CDCl<sub>3</sub>)  $\delta$  7.40-7.30 (m, 5H, ArH), 5.80 (d,  $J$  = 8.0 Hz, 1H, NH), 5.12 (d,  $J$  = 2.0 Hz, 2H, CH<sub>2</sub> of Cbz), 4.83 (d,  $J$  = 3.6 Hz, 1H, H-1), 4.56-4.52 (m, 1H, -CH), 4.14

(dd,  $J = 10.0, 3.6$  Hz, 1H, H-3), 4.10-3.93 (m, 3H, H-5 & -CH<sub>2</sub>), 3.77 (s, 3H, CH<sub>3</sub>), 3.70 (d,  $J = 3.6$  Hz, 1H, H-4), 3.39 (dd,  $J = 10.0, 3.6$  Hz, 1H, H-2), 1.24 (d,  $J = 6.4$  Hz, 3H, CH<sub>3</sub>); <sup>13</sup>C NMR (100 MHz, CDCl<sub>3</sub>)  $\delta$  170.4, 156.1, 136.1, 128.6, 128.4, 128.2, 98.8, 68.9, 68.2, 67.3, 66.5, 65.8, 60.0, 54.4, 52.3, 17.2; HR-ESI-MS ( $m/z$ ): [M + Na]<sup>+</sup> calcd. for C<sub>18</sub>H<sub>23</sub>N<sub>7</sub>O<sub>7</sub>Na, 472.1557; found, 472.1578.

***p*-Methoxyphenyl 2,3,4,6-Tetra-*O*-acetyl- $\beta$ -D-galactopyranosyl-(1 $\rightarrow$ 4)-6-*O*-Benzoyl-2,3-dibenzyl- $\alpha$ -D-galactopyranoside (16):**

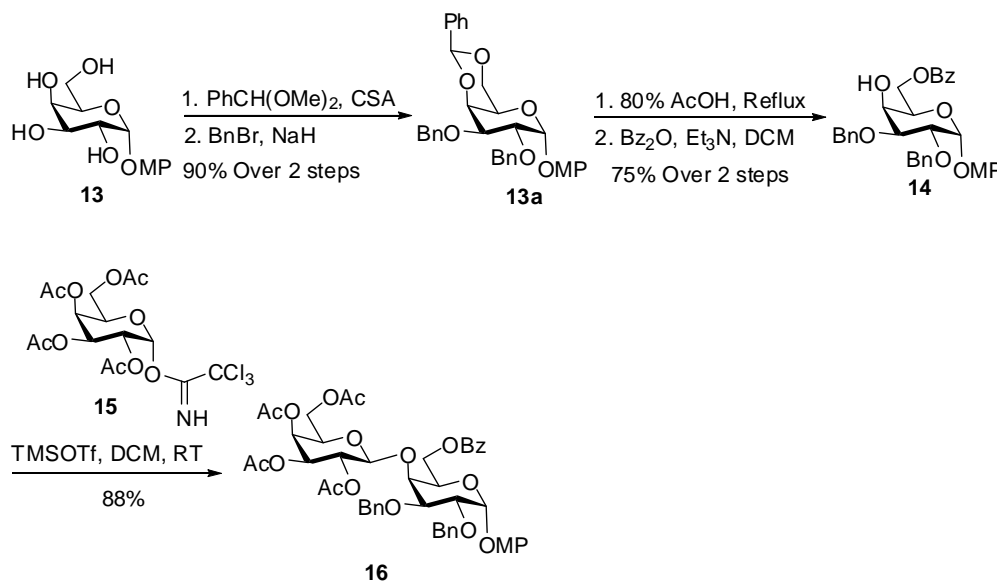

***p*-Methoxyphenyl 4,6-Benzylidene-2,3-dibenzyl- $\alpha$ -D-galactopyranoside (13a):**

Camphorsulfonic acid (0.38 g, 1.6 mmol) was added to a solution of *p*-methoxyphenyl  $\alpha$ -D-galactopyranoside **13** (1.9 g, 6.6 mmol) in acetonitrile (25 mL). After 10 min, benzaldehyde dimethyl acetal (1.2 mL, 8.0 mmol) was added drop wise to it and the mixture was kept for stirring at rt for 30 min. Then the reaction was quenched with triethylamine until the pH was adjusted to 7, and then the solvents were removed *in vacuo*.

The crude product which was obtained after removal of solvents was dissolved in DMF (25 mL) and to this, NaH (0.8 g, 33.3 mmol) was added at 0 °C. After 10 min, BnBr (3.4 mL, 20.0 mmol) was added and kept for stirring at rt overnight. Then reaction mixture was quenched with water and extracted with EtOAc twice. Combined organic layers were concentrated and chromatographed on silica gel (10% ethyl acetate: pet ether) to afford **13a** as a white solid (3.3 g, 90%). <sup>1</sup>H NMR (400 MHz, CDCl<sub>3</sub>)  $\delta$  7.56-7.29 (m, 15H, ArH), 7.03 (d,  $J = 9.0$  Hz, 2H, ArH), 6.78 (d,  $J =$

9.0 Hz, 2H, ArH), 5.53 (d,  $J = 2.0$  Hz, 1 H, H-1), 5.51 (s, 1H, benzylidene), 4.91-4.69 (m, 4H, ArCH<sub>2</sub>), 4.27-4.17 (m, 4H), 3.99 (dd,  $J = 12.0, 1.6$  Hz, 1H), 3.78 (s, 3H, CH<sub>3</sub>), 3.75 (s, 1H); <sup>13</sup>C NMR (100 MHz, CDCl<sub>3</sub>) δ 154.9, 151.0, 138.8, 138.5, 137.7, 128.9, 128.6, 128.4, 128.2, 127.9, 127.7, 127.69, 127.64, 126.3, 117.7, 114.5, 101.0, 97.3, 76.0, 75.3, 74.6, 73.6, 72.2, 69.4, 63.2, 55.6; HR-ESI-MS ( $m/z$ ): [M + Na]<sup>+</sup> calcd. for C<sub>34</sub>H<sub>34</sub>O<sub>7</sub>Na, 577.2202; found, 577.2192.

***p*-Methoxyphenyl 6-Benzoyl-2,3-dibenzyl- $\alpha$ -D-galactopyranoside (14):**

A solution of **13a** (0.65 g, 1.1 mmol) in 80% aq. acetic acid solution (26 mL) was stirred at 80 °C for 1.5 h. After complete consumption of starting material solvents were removed *in vacuo* and the residue was azeotroped with toluene twice. The crude product which was obtained after solvent removal was dissolved in CH<sub>2</sub>Cl<sub>2</sub> (20 mL) and to this, Et<sub>3</sub>N (1.5 mL, 10.6 mmol), and Bz<sub>2</sub>O (0.37 g, 1.6 mmol) were added. After 6 h, solvents were evaporated *in vacuo* and the residue was chromatographed on silica gel (10% ethyl acetate: pet ether) to obtain the desired compound **14** as a white solid (0.5 g, 75%); <sup>1</sup>H NMR (400 MHz, CDCl<sub>3</sub>) δ 7.89-7.87 (m, 2H, ArH), 7.56-7.52 (m, 1H, ArH), 7.42-7.27 (m, 12H, ArH), 7.02 (d,  $J = 9.0$  Hz, 2H, ArH), 6.67 (d,  $J = 9.0$  Hz, 2H, ArH), 5.38 (d,  $J = 3.6$  Hz, 1H, H-1), 4.91-4.72 (m, 4H, ArCH<sub>2</sub>), 4.54-4.46 (m, 2H), 4.29-4.26 (m, 1H), 4.12-4.09 (m, 2H), 4.02-3.99 (m, 1H), 3.70 (s, 3H, CH<sub>3</sub>), 2.61 (s, 1H, OH); <sup>13</sup>C NMR (100 MHz, CDCl<sub>3</sub>) δ 166.4, 155.2, 150.7, 138.2, 138.0, 133.2, 129.9, 128.5, 128.7, 128.6, 128.4, 128.2, 128.1, 128.0, 118.7, 114.5, 97.0, 75.6, 73.5, 73.2, 68.5, 68.0, 64.3, 55.6; HR-ESI-MS ( $m/z$ ): [M + Na]<sup>+</sup> calcd. for C<sub>34</sub>H<sub>34</sub>O<sub>8</sub>Na, 593.2151; found, 593.2129.

***p*-Methoxyphenyl 2,3,4,6-Tetra-*O*-acetyl- $\beta$ -D-galctopyranosyl-(1→4)-6-*O*-Benzoyl-2,3-dibenzyl- $\alpha$ -D-galactopyranoside (16):**

TMSOTf (3  $\mu$ L, 0.015 mmol) was added drop wise to a suspension of imidate **15** (0.25 g, 0.5 mmol), acceptor **14** (0.23 g, 0.4 mmol) and 3 Å MS (0.3 g) at rt and the reaction mixture was stirred at the same temperature for 4 h. The mixture was diluted with CH<sub>2</sub>Cl<sub>2</sub> filtered through celite and concentrated. The residue was purified by silica gel chromatography (30% ethyl acetate: pet ether) to give the desired product **16** as a foam (0.32 g, 88%). <sup>1</sup>H NMR (400 MHz, CDCl<sub>3</sub>) δ 7.85-7.83 (m, 2H, ArH), 7.55-7.53 (m, 1H, ArH), 7.51-7.27 (m, 12H, ArH), 6.96 (d,  $J = 9.0$  Hz, 2H, ArH),

6.61 (d,  $J = 9.0$  Hz, 2H, ArH), 5.37 (d,  $J = 3.3$  Hz, 1H, H-4'), 5.33 (d,  $J = 3.6$  Hz, 1H, H-1), 5.22 (ap.t,  $J = 10.0, 7.8$  Hz, 1H, H-2'), 5.02 (dd,  $J = 10.0, 3.3$  Hz, 1H, H-3'), 4.91-4.61 (m, 5H, H-1' & ArCH<sub>2</sub>), 4.52 (dd,  $J = 12.0, 3.4$  Hz, 1H, H-6b), 4.27 (ap.t,  $J = 12.0, 8.4$  Hz, 1H, H-6a), 4.25 (dd,  $J = 8.4, 3.4$  Hz, 1H, H-5), 4.10-4.08 (m, 4H, H-3, H-4, H-6'a & H-6'b), 3.94 (dd,  $J = 10.0, 3.6$  Hz, 1H, H-2), 3.83 (t,  $J = 6.4$  Hz, 1H, H-5'), 3.68 (s, 3H, CH<sub>3</sub>), 2.14 (s, 3H, CH<sub>3</sub>), 2.00 (s, 3H, CH<sub>3</sub>), 1.99 (s, 3H, CH<sub>3</sub>), 1.83 (s, 3H, CH<sub>3</sub>); <sup>13</sup>C NMR (100 MHz, CDCl<sub>3</sub>):  $\delta$  170.4, 170.3, 170.2, 169.7, 166.2, 155.0, 150.6, 138.3, 138.2, 132.9, 129.9, 129.6, 128.54, 128.50, 128.23, 127.97, 127.92, 127.8, 118.6, 114.3, 102.3, 97.0, 77.81, 76.8, 76.7, 76.4, 73.9, 73.6, 70.8, 70.4, 68.9, 68.6, 66.8, 64.8, 61.4, 55.4, 20.8, 20.7, 20.6; HR-ESI-MS ( $m/z$ ): [M + Na]<sup>+</sup> calcd. for C<sub>48</sub>H<sub>52</sub>O<sub>17</sub>Na, 923.3102; found, 923.3087.

**2,3,4,6-Tetra-*O*-acetyl- $\beta$ -D-galactopyranosyl-(1 $\rightarrow$ 4)-6-*O*-Benzoyl-2,3-dibenzyl- $\alpha$ -D-galactopyranoside Chloride (**17**):**

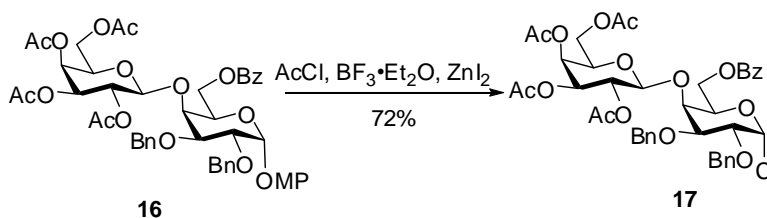

BF<sub>3</sub>·Et<sub>2</sub>O (90  $\mu$ L, 0.7 mmol) was added to a solution of disaccharide **16** (0.18 g, 0.2 mmol), and AcCl (0.14 mL, 1.9 mmol) in CHCl<sub>3</sub> (4 mL) at 0 °C. After 5 min, ZnI<sub>2</sub> (3 mg) was added and the reaction mixture was brought to rt. After stirring at rt for 45 min., the reaction mixture was diluted with CH<sub>2</sub>Cl<sub>2</sub> and washed with aq. NaHCO<sub>3</sub> and brine. Separated organic layer was dried over Na<sub>2</sub>SO<sub>4</sub>, concentrated and chromatographed on silica gel (30% ethyl acetate: pet ether) to afford the glycosyl chloride **17** as a foam (0.12 g, 72%). <sup>1</sup>H NMR (400 MHz, CDCl<sub>3</sub>)  $\delta$  7.94 (d,  $J = 7.2$  Hz, 2H, ArH), 7.49-7.47 (m, 1H, ArH), 7.38-7.11 (m, 12H, ArH), 5.99 (d,  $J = 3.6$  Hz, 1H, H-1), 5.28 (d,  $J = 3.4$  Hz, 1H, H-4'), 5.22 (ap.t,  $J = 10.0, 7.8$  Hz, 1H, H-2'), 4.93 (dd,  $J = 10.0, 3.4$  Hz, 1H, H-3'), 4.79-4.53 (m, 6H, H-1', H-5 & ArCH<sub>2</sub>), 4.32-4.27 (m, 2H, H-6a & H-6b), 4.02-3.84 (m, 5H, H-2, H-3, H-4, H-6'a & H-6'b), 3.74 (t,  $J = 6.4$  Hz, 1H, H-5'), 2.06 (s, 3H, CH<sub>3</sub>), 1.92 (s, 3H, CH<sub>3</sub>), 1.90 (s, 3H, CH<sub>3</sub>), 1.74 (s, 3H, CH<sub>3</sub>); <sup>13</sup>C NMR (100 MHz, CDCl<sub>3</sub>):  $\delta$  170.6, 170.5, 170.3, 169.9, 166.3, 138.1, 137.7, 133.3, 129.9, 129.8, 129.1, 128.7, 128.5, 128.3, 128.2, 128.07, 128.03, 125.4, 102.5, 94.4, 77.27, 76.57, 76.4, 74.2, 73.5, 71.5, 70.8, 70.5, 69.1, 66.8, 64.1,



61.4, 20.9, 20.8, 20.78, 20.7; HR-ESI-MS ( $m/z$ ):  $[M + Na]^+$  calcd. for  $C_{41}H_{45}O_{15}NaCl$ , 835.2345; found, 835.2369.

***N*-(Benzyloxycarbonyl)-*O*-(2,3,4,6-tetra-*O*-acetyl- $\beta$ -D-galactopyranosyl-(1 $\rightarrow$ 4))-*O*-Benzoyl-2,3-dibenzyl- $\alpha$ -D-galactopyranosyl-(1 $\rightarrow$ 3)-2,4-diazido-2,4,6-trideoxy- $\alpha$ -D-galactopyranosyl)-L-serine methylester (**18**):**

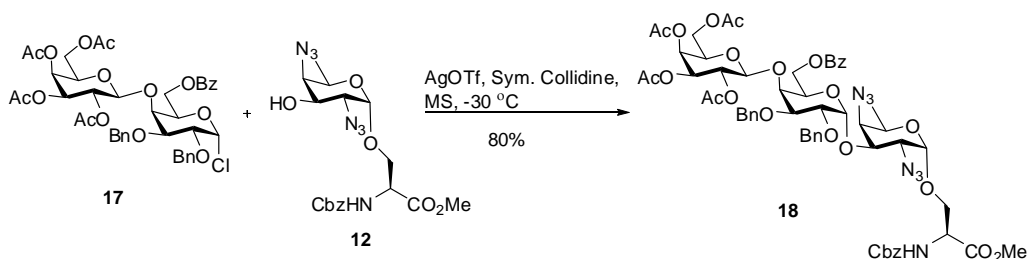

AgOTf (0.18 g, 0.7 mmol) was added to a premixed solution of glycosyl chloride **17** (0.28 g, 0.35 mmol), acceptor **12** (0.13 g, 0.29 mmol), sym. collidene (45  $\mu$ L, 0.32 mmol) and 3 Å MS in  $CH_2Cl_2$  (8 mL) at -30 °C and the reaction mixture was stirred at the same temperature for 3 h. The reaction mixture was quenched with  $Et_3N$  and the mixture was filtered through celite. Filtrate was concentrated *in vacuo* and chromatographed on silica gel (35% ethyl acetate: pet ether) to obtain **18** as a viscous liquid (0.28 g, 80%). <sup>1</sup>H NMR (400 MHz,  $CDCl_3$ )  $\delta$  8.03-8.01 (m, 2H, ArH), 7.56-7.54 (m, 1H, ArH), 7.44-7.30 (m, 17H, ArH), 5.78 (d,  $J = 8.0$  Hz, 1H, NH), 5.33 (d,  $J = 3.0$  Hz, 1H, H-4''), 5.22 (ap.t,  $J = 10.0, 7.8$  Hz, 1H, H-2''), 5.11 (s, 2H,  $CH_2$  of Cbz), 5.01-4.98 (m, 2H, H-3'' & H-1), 4.86-4.79 (m, 2H, Ar $CH_2$ ), 4.74 (d,  $J = 3.6$  Hz, 1H, H-1'), 4.68-4.54 (m, 4H, H-1'', H-6'a & Ar $CH_2$ ), 4.48-4.46 (m, 1H, CH), 4.41-4.30 (m, 2H), 4.06-3.82 (m, 5H), 3.78-3.70 (m, 5H), 3.68 (s, 3H,  $CH_3$ ), 3.60 (s, 1H), 3.34 (dd,  $J = 10.0, J = 3.6$  Hz, 1H, H-2'), 2.12 (s, 3H,  $CH_3$ ), 1.98 (s, 3H,  $CH_3$ ), 1.93 (s, 3H,  $CH_3$ ), 1.88 (s, 3H,  $CH_3$ ), 1.04 (d,  $J = 6.4$  Hz, 3H,  $CH_3$ ); <sup>13</sup>C NMR (100 MHz,  $CDCl_3$ ):  $\delta$  170.5, 170.4, 170.3, 170.2, 169.8, 166.4, 156.0, 138.5, 138.4, 136.2, 133.0, 130.3, 129.7, 128.7, 128.68, 128.65, 128.46, 128.43, 128.2, 128.16, 128.13, 128.10, 127.7, 102.3, 101.0, 99.6, 77.9, 77.87, 76.7, 74.6, 73.8, 70.9, 70.4, 69.6, 69.2, 67.3, 66.9, 65.7, 64.3, 63.9, 61.3, 58.8, 54.5, 52.9, 21.0, 20.8, 20.7, 20.6, 17.1; HR-ESI-MS ( $m/z$ ):  $[M + Na]^+$  calcd. for  $C_{59}H_{67}O_{22}N_7Na$ , 1248.4237; found, 1248.4272.

***N*-(Benzyloxycarbonyl)-*O*-( $\beta$ -D-galactopyranosyl-(1 $\rightarrow$ 4)- $\alpha$ -D-galactopyranosyl-(1 $\rightarrow$ 3)-2,4-diacetimidido-2,4,6-trideoxy- $\alpha$ -D-galactopyranosyl)-L-serine (**19**):**

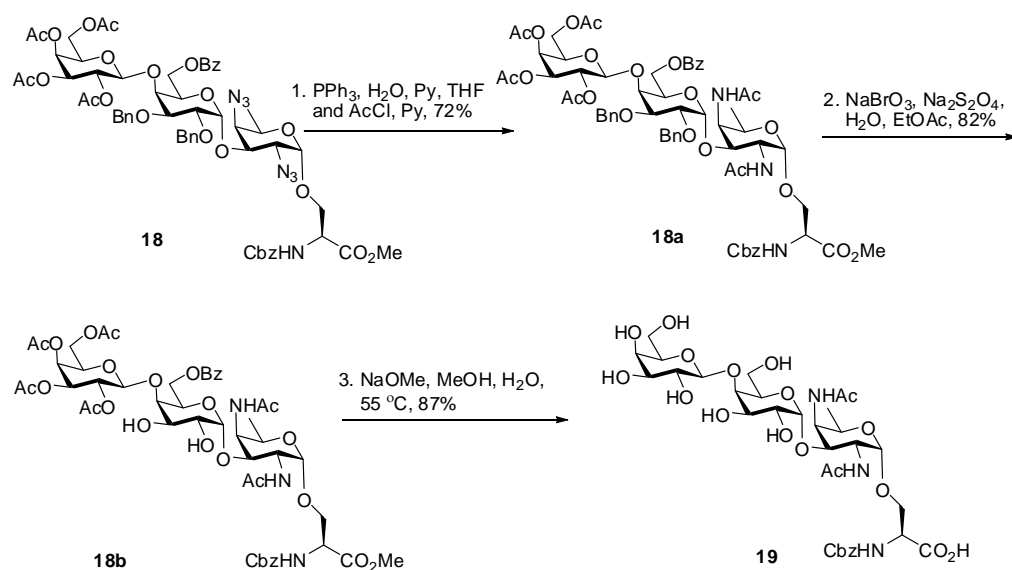

***N*-(Benzyloxycarbonyl)-*O*-(2,3,4,6-tetra-*O*-acetyl- $\beta$ -D-galactopyranosyl-(1 $\rightarrow$ 4)-6-*O*-Benzoyl-2,3-dibenzyl- $\alpha$ -D-galactopyranosyl-(1 $\rightarrow$ 3)-2,4-diacetimidido-2,4,6-trideoxy- $\alpha$ -D-galactopyranosyl)-L-serine methylester (**18a**):**

Pyridine (0.15 mL, 1.9 mmol) and water (35  $\mu\text{L}$ , 1.9 mmol) were added to a clear solution of trisaccharide **18** (0.23 g, 0.19 mmol) and  $\text{PPh}_3$  (0.2 g, 0.77 mmol) in THF (4 mL) and then the reaction mixture was kept for reflux for 4 h at 70 °C. Then solvents were removed *in vacuo* and the crude product was dissolved in pyridine (3 mL) and  $\text{Ac}_2\text{O}$  (0.36 mL, 3.8 mmol) was added. After stirring the reaction mixture at rt for 10 h solvents were removed under reduced pressure and the crude product was chromatographed on silica gel (60% ethyl acetate: pet ether) to obtain **18a** as a foam (0.175 g, 72%).  $^1\text{H}$  NMR (400 MHz,  $\text{CDCl}_3$ )  $\delta$  8.16 (d,  $J = 7.4$  Hz, 2H, ArH), 7.60 (t,  $J = 7.4$  Hz, 1H, ArH), 7.46 (t,  $J = 7.4$  Hz, 1H, ArH), 7.33-7.14 (m, 16H, ArH), 6.82 (d,  $J = 9.4$  Hz, 1H, NH), 6.33 (d,  $J = 9.6$  Hz, 1H, NH), 6.18 (d,  $J = 9.6$  Hz, 1H, NH), 5.43 (d,  $J = 3.2$  Hz, 1H, H-4''), 5.32 (d,  $J = 2.7$  Hz, 1H, H-1), 5.22 (ap.t,  $J = 10.0$ , 8.0 Hz, 1H, H-2''), 5.03 (dd,  $J = 10.0$ , 3.2 Hz, 1H, H-3''), 4.96 (d,  $J = 12.0$  Hz, 1H, ArCH<sub>2</sub>), 4.81-4.76 (m, 2H), 4.71-4.66 (m, 3H), 4.57-4.46 (m, 6H), 4.30-4.26 (m, 2H), 4.14-3.75 (m, 9H), 3.72 (s, 3H, CH<sub>3</sub>), 3.68-3.66 (m, 1H), 2.17 (s, 3H, CH<sub>3</sub>), 2.00 (s, 3H, CH<sub>3</sub>), 1.99 (s, 3H, CH<sub>3</sub>), 1.76 (s, 3H, CH<sub>3</sub>), 1.71 (s, 3H, CH<sub>3</sub>), 1.63 (s, 3H, CH<sub>3</sub>),

1.10 (d,  $J = 6.4$  Hz, 3H, CH<sub>3</sub>); <sup>13</sup>C NMR (100 MHz, CDCl<sub>3</sub>)  $\delta$  171.2, 171.0, 170.4, 170.3, 170.2, 169.7, 169.0, 156.3, 138.4, 136.2, 134.0, 130.2, 129.1, 128.8, 128.5, 128.3, 128.0, 127.9, 127.7, 127.5, 127.4, 102.2, 99.0, 91.6, 77.4, 76.8, 75.4, 74.1, 73.0, 70.9, 70.3, 68.9, 68.5, 68.3, 66.7, 66.07, 66.0, 62.8, 60.8, 54.6, 52.6, 48.1, 47.5, 22.97, 22.94, 20.8, 20.7, 16.7; HR-ESI-MS ( $m/z$ ): [M + Na]<sup>+</sup> calcd. for C<sub>63</sub>H<sub>75</sub>O<sub>24</sub>N<sub>3</sub>Na, 1280.4638; found, 1280.4702.

***N*-(Benzyloxycarbonyl)-*O*-(2,3,4,6-tetra-*O*-acetyl- $\beta$ -D-galctopyranosyl-(1 $\rightarrow$ 4)-6-*O*-Benzoyl- $\alpha$ -D-galactopyranosyl-(1 $\rightarrow$ 3)-2,4-diacetimido-2,4,6-trideoxy- $\alpha$ -D-galactopyranosyl)-L-serine methylester (18b):**

A solution of NaBrO<sub>3</sub> (0.07 g, 0.47 mmol) in water (1.5 mL) was added to a clear solution of **18a** (0.1 g, 0.08 mmol) in EtOAc (1.1 mL). To this biphasic layer a solution of Na<sub>2</sub>S<sub>2</sub>O<sub>4</sub> (0.07 g, 0.04 mmol) in water (2 mL) was added dropwise over 5 min. After 45 min. reaction mixture was quenched with aq. Na<sub>2</sub>S<sub>2</sub>O<sub>3</sub> solution and extracted with EtOAc (30 mL x 3). Combined organic layers dried over Na<sub>2</sub>SO<sub>4</sub>, concentrated and chromatographed on silica gel (5% methanol: ethyl acetate) to afford the desired product **18b** as a white solid (70 mg, 82%). <sup>1</sup>H NMR (400 MHz, CD<sub>3</sub>OD)  $\delta$  8.07 (d,  $J = 7.4$  Hz, 2H, ArH), 7.51 (t,  $J = 7.4$  Hz, 1H, ArH), 7.47 (t,  $J = 7.4$  Hz, 2H, ArH), 7.30-7.28 (m, 5H, ArH), 5.43 (d,  $J = 1.8$  Hz, 1H), 5.14-5.01 (m, 5H), 4.90 (m, 1H), 4.74 (d,  $J = 1.8$  Hz, 1H), 4.57 (t,  $J = 9.2$  Hz, 1H), 4.46 (t,  $J = 4.0$  Hz, 1H), 4.40-4.39 (m, 1H), 4.28-4.22 (m, 2H), 4.10-3.85 (m, 8H), 3.79-3.75 (m, 1H), 3.72 (s, 3H, CH<sub>3</sub>), 3.71-3.68 (m, 1H), 3.57 (dd,  $J = 10.0, 3.6$  Hz, 1H), 2.11 (s, 3H, CH<sub>3</sub>), 2.09 (s, 3H, CH<sub>3</sub>), 2.05 (s, 3H, CH<sub>3</sub>), 1.94 (s, 3H, CH<sub>3</sub>), 1.88 (s, 3H, CH<sub>3</sub>), 1.85 (s, 3H, CH<sub>3</sub>), 1.09 (d,  $J = 6.4$  Hz, 3H, CH<sub>3</sub>); <sup>13</sup>C NMR (100 MHz, CD<sub>3</sub>OD)  $\delta$  173.3, 171.7, 170.7, 170.4, 170.3, 170.2, 169.9, 166.5, 156.7, 136.2, 133.0, 129.4, 129.2, 128.2, 127.9, 127.5, 127.3, 101.7, 98.4, 96.8, 76.3, 73.3, 70.6, 69.8, 69.4, 69.0, 68.7, 67.4, 66.9, 66.2, 64.9, 62.4, 60.6, 54.2, 51.4, 49.5, 21.5, 21.0, 19.5, 18.9, 18.8, 15.3; HR-ESI-MS ( $m/z$ ): [M + Na]<sup>+</sup> calcd. for C<sub>49</sub>H<sub>64</sub>O<sub>24</sub>N<sub>3</sub>Na, 1078.3880; found, 1078.3940.

***N*-(Benzyloxycarbonyl)-*O*-( $\beta$ -D-galctopyranosyl-(1 $\rightarrow$ 4)- $\alpha$ -D-galactopyranosyl-(1 $\rightarrow$ 3)-2,4-diacetimido-2,4,6-trideoxy- $\alpha$ -D-galactopyranosyl)-L-serine (19):**

A solution of NaOMe (35 mg) in MeOH (2 mL) was added to a clear solution of **18b** (33 mg, 0.03 mmol) in MeOH (2 mL) and water (2 mL) at 50 °C (pH 10). After stirring the reaction mixture at the same temperature for 20 h, the reaction mixture was neutralized with AcOH until the pH adjusted to 6. Then solvents were removed under reduced pressure and the crude product was chromatographed on silica gel (7:2:1 ethyl acetate: MeOH: H<sub>2</sub>O) to afford the desired product **19** as a white solid (20 mg, 87%). <sup>1</sup>H NMR (400 MHz, CD<sub>3</sub>OD) δ 7.38-7.29 (m, 5H, ArH), 5.12-5.08 (m, 2H), 4.99-4.90 (m, 2H), 4.74-4.69 (m, 1H), 4.43 (d, *J* = 8.0 Hz, 1H), 4.35-4.32 (m, 1H), 4.24-4.15 (m, 2H), 4.06-3.94 (m, 3H), 3.87-3.79 (m, 2H), 3.77-3.61 (m, 8H), 3.58-3.45 (m, 2H), 2.03, 2.02 (2s, 3H, CH<sub>3</sub>), 2.02, 1.89 (2s, 3H, CH<sub>3</sub>), 1.05, 1.03 (2d, *J* = 6.4 Hz, 3H, CH<sub>3</sub>); <sup>13</sup>C NMR (100 MHz, CD<sub>3</sub>OD) δ 176.8, 174.9, 174.0, 173.8, 170.5, 158.3, 158.1, 138.3, 129.15, 129.09, 129.02, 107.0, 99.7, 99.1, 98.2, 97.9, 80.5, 77.1, 75.3, 74.5, 74.2, 73.3, 72.0, 71.9, 71.1, 71.0, 70.5, 67.7, 67.1, 66.3, 66.1, 62.9, 62.7, 61.5, 57.7, 51.3, 51.1, 50.1, 24.1, 23.2, 23.1, 22.7, 17.0; HR-ESI-MS (*m/z*): [M + Na]<sup>+</sup> calcd. for C<sub>33</sub>H<sub>49</sub>O<sub>19</sub>N<sub>3</sub>Na, 814.2858; found, 814.2849.

## II. Spectra:

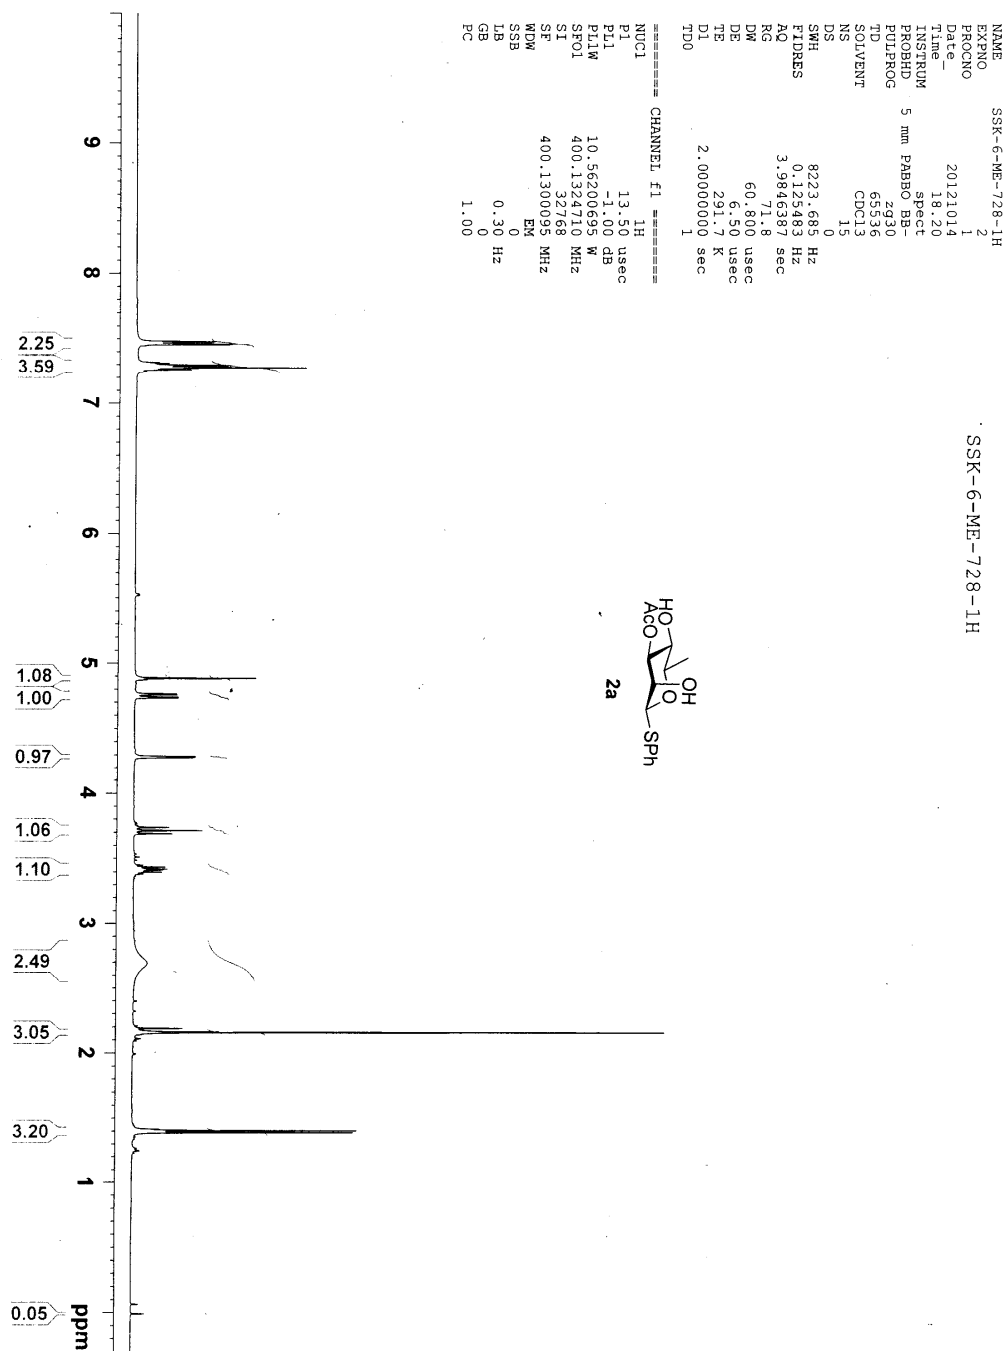

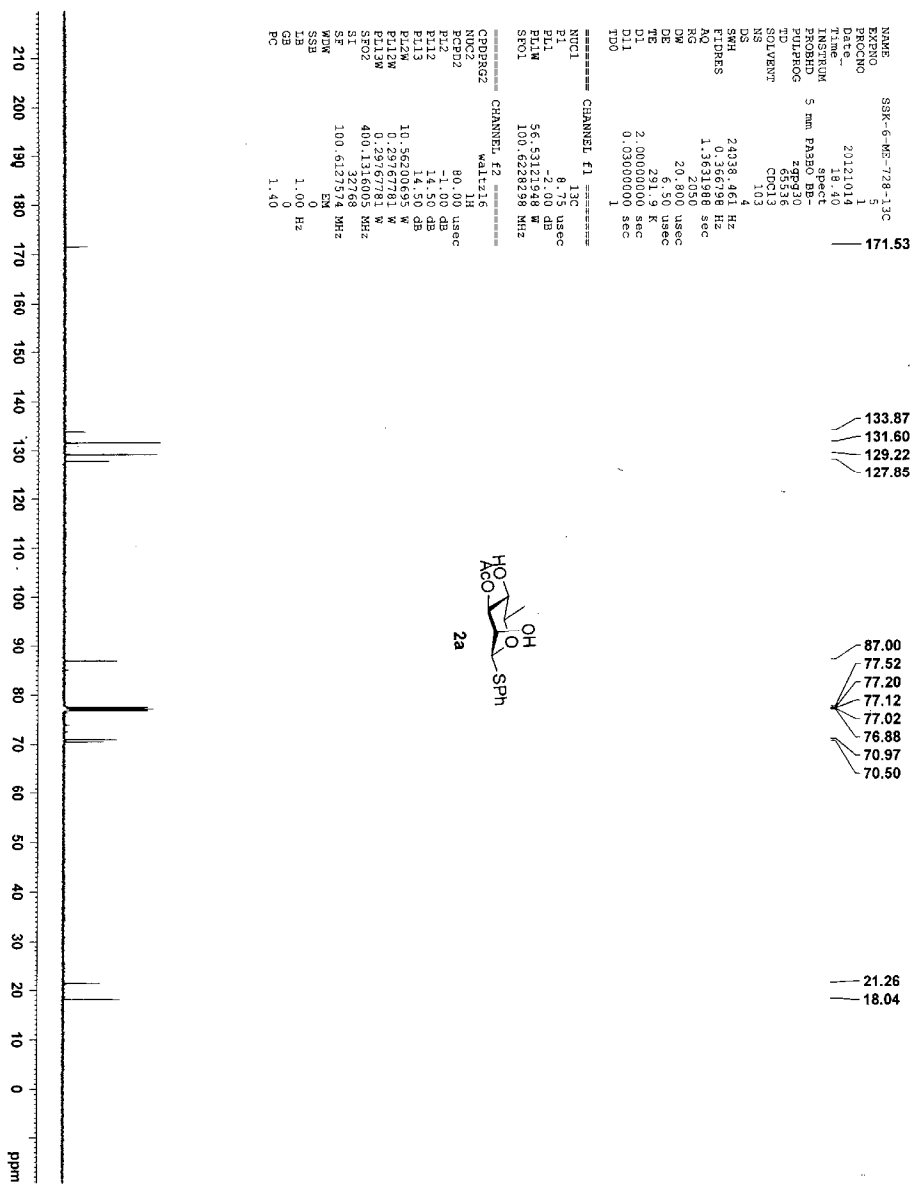

SSK-6-ME-728-COSY

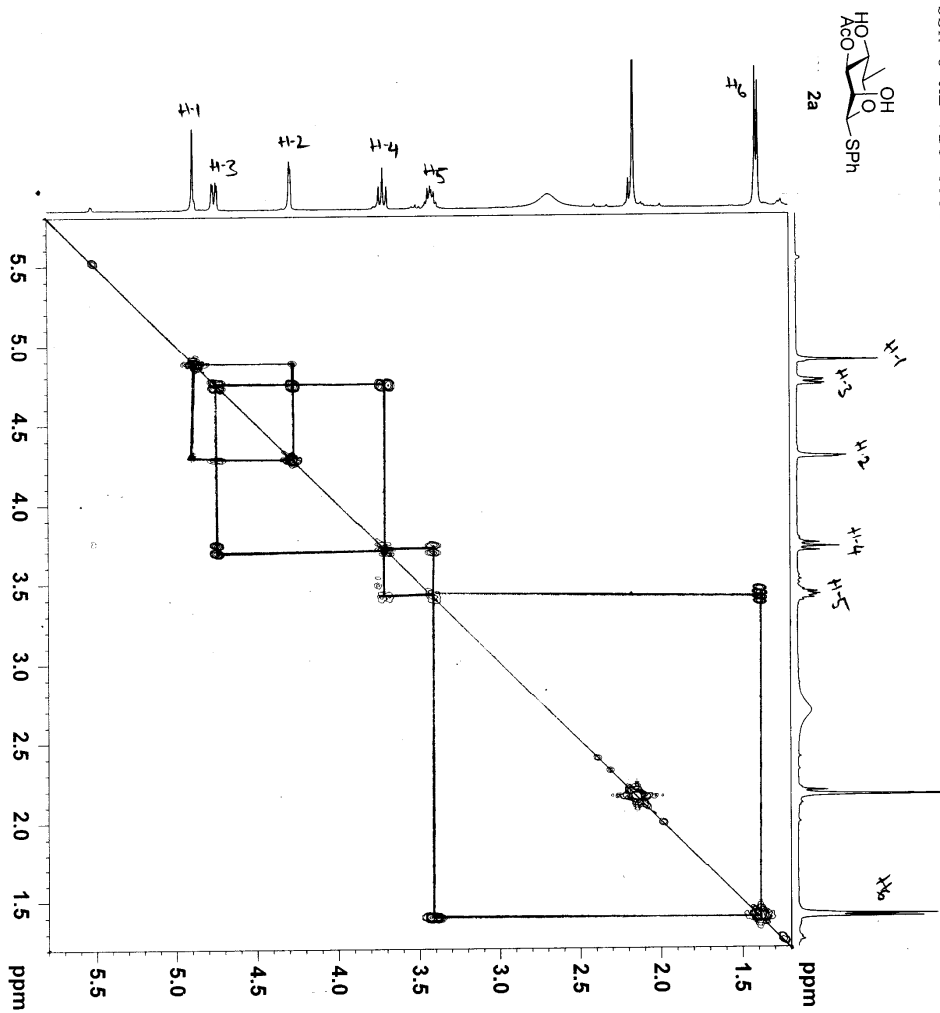

NAME SSK-6-ME-728-COSY  
 EXNO 100  
 PROCNO 1  
 Date 20121014  
 Time 20:46  
 INSTRUM spect  
 PULPROG zgpg30  
 TD 1024  
 SOLVENT CDCl3  
 NS 16  
 DS 16  
 SWH 3019.324 Hz  
 FIDRES 2.948558 Hz  
 AQ 0.1696244 sec  
 RG 161  
 LW 165.600 usec  
 DE 6.50 usec  
 TE 29.50  
 TD 1024  
 DE 0.00000300 sec  
 D1 1.00000000 sec  
 D13 0.00000400 sec  
 D16 0.00020000 sec  
 INO 0.00033120 sec

==== CHANNEL f1 =====  
 NUC1 1H  
 P0 13.50 usec  
 P1 13.50 usec  
 P11 1.00 usec  
 PL1W 10.56204098 W  
 SF01 400.1317503 MHz

==== GRADIENT CHANNEL =====  
 GRVAMA 10.00 %  
 GPZ1 10.00 usec  
 P16 1  
 NDO 1  
 TD 161  
 SF01 400.1318 MHz  
 FIDRES 18.753504 Hz  
 SW 7.546 ppm  
 ENMODE 2048  
 SI 2048  
 SF 400.1300095 MHz  
 WDW SINE  
 SSB 0  
 LB 0.00 Hz  
 GB 0  
 PC 1.40  
 SI 512  
 MC2 QF  
 SF 400.1300095 MHz  
 NDM SINE  
 LNB SINE  
 GB 0 C.00 Hz

SK-6-ME-561-1H

```
NAME SK-6-ME-561-1H
EXPNO 98
PROCNO 1
Date_ 20120607
Time 4.16
INSTRUM 5 mm PABBO BB-
PROBHD spect
PULPROG zg30
TD 65536
SOLVENT CDCl3
NS 30
DS 0
SWH 8223.685 Hz
FIDRES 0.125483 Hz
AQ 3.9846387 sec
RG 71.8
DE 60.800 usec
TE 292.8 K
D1 2.00000000 sec
TD0 1
```

```
===== CHANNEL f1 =====
NUC1 1H
P1 13.50 usec
PL1 -1.00 dB
PL1W 10.56200695 W
SFO1 400.1324710 MHz
SI 32768
SF 400.1300095 MHz
MDW EM
SSB 0
LB 0.30 Hz
GB 0
PC 1.00
```

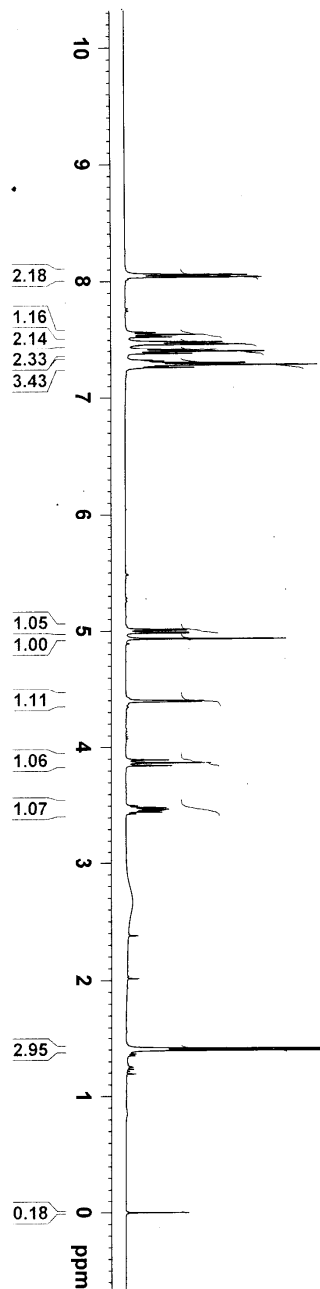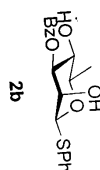



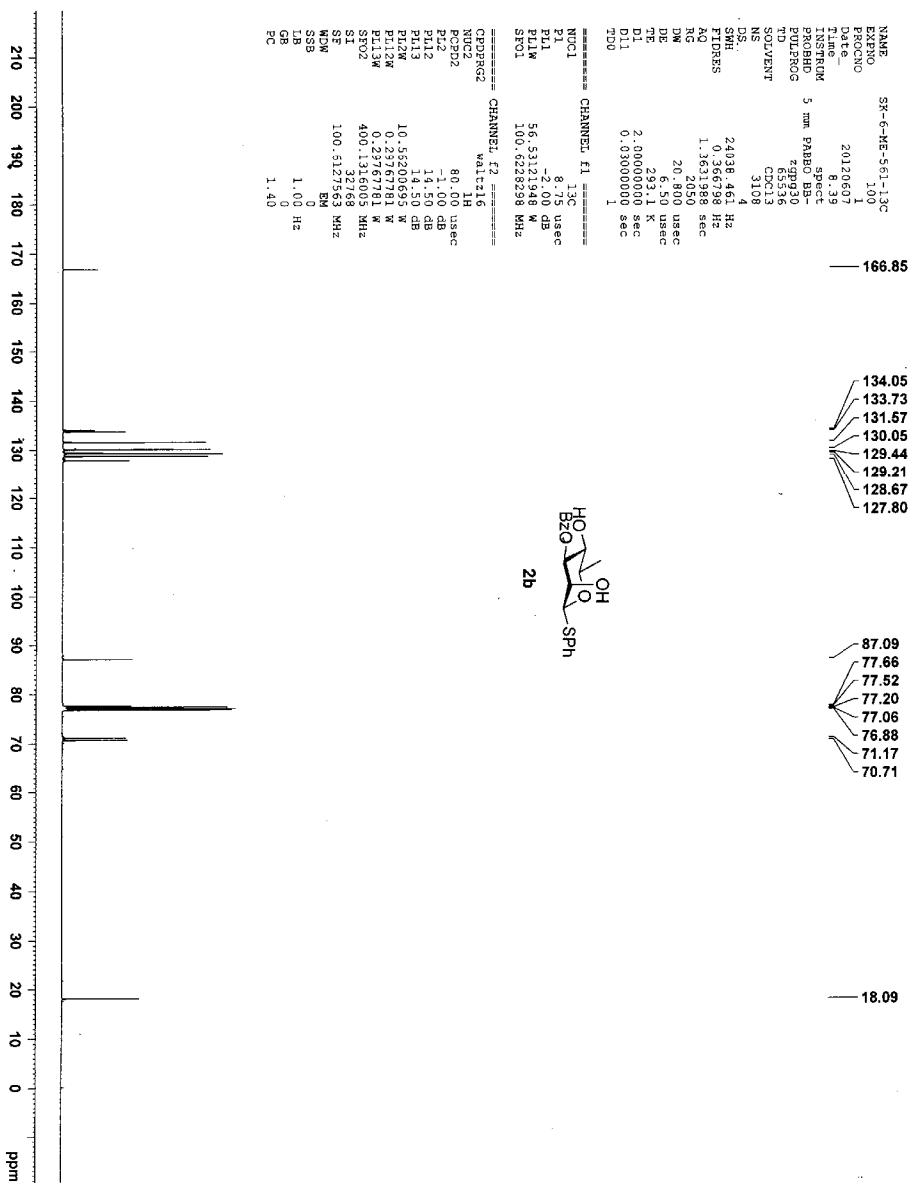

SK-6-ME-561-COSY

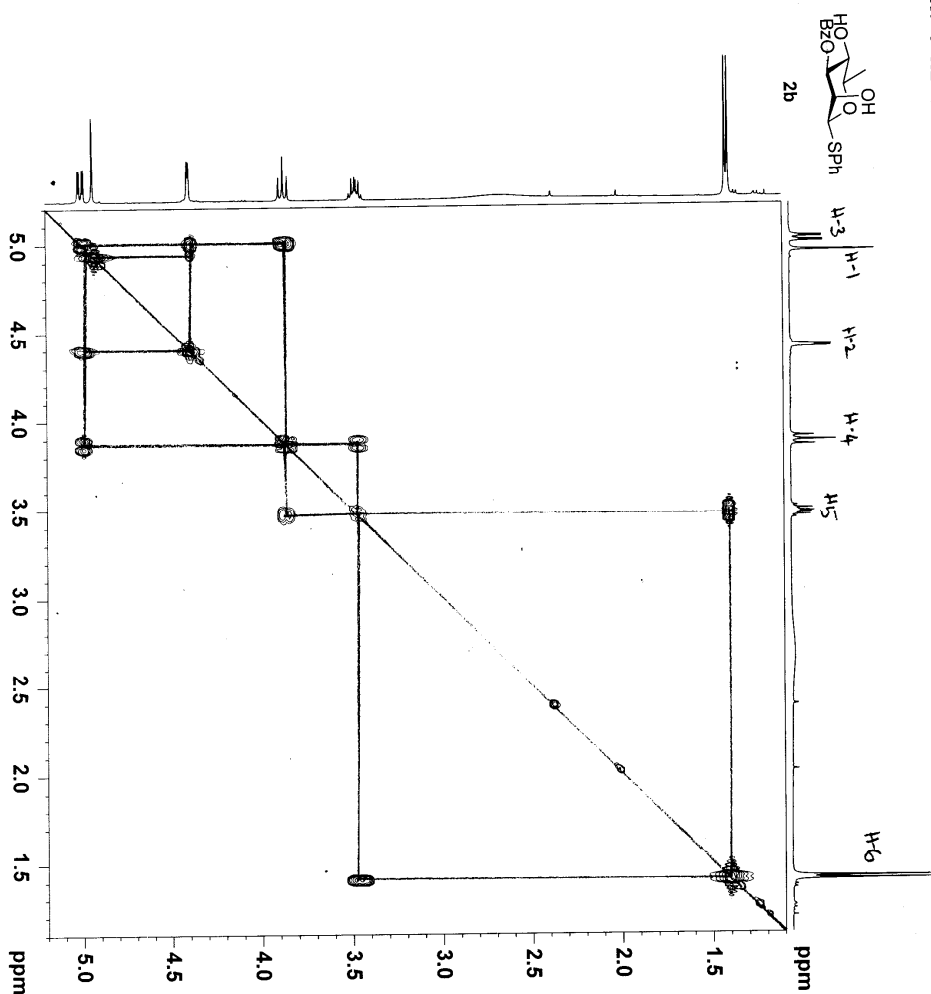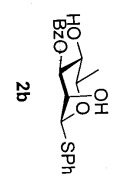

```

NAME SK-6-ME-561-COSY
EXPNO 99
PROCNO 1
Date_ 20120607
Time 4.20
INSTRUM spect
PROBHD 5 mm PABBO BB-
PULPROG cosypppr4
TD 65536
SOLVENT CDCl3
NS 16
DS 16
SMH 3467.406 Hz
FIDRES 3.386139 Hz
AQ 0.1477108 sec
RG 161
EM 144.200 usec
TE 298.15 K
TO 0.0000300 sec
D1 1.0000000 sec
D12 0.0000000 sec
D16 0.0002000 sec
TMO 0.00028840 sec

===== CHANNEL f1 =====
NUC1 1H
P0 13.50 usec
P1 13.50 usec
PL1 -1.00 dB
PL1W 10.56200695 W
SFO1 400.131636 MHz

===== GRADIENT CHANNEL =====
GPNAM1
GPZ1 SINE.100
PI6 10.00 %
P16 1000.00 usec
ND0 1
TD 256
SFO1 400.1317 MHz
FIDRES 13.544613 Hz
SN 8.666 ppm
FAMODE QF
SI 20.08
NDW 400.130094 MHz
SSB SINE
JB 0.00 Hz
PC 1.40
SI 512
MC2 QF
SE 400.130095 MHz
MDW SINE
SSB 0
CB 0.00 Hz
    
```

SSK-6-ME.-531-1H

```

NAME          SSK-6-ME.-531-1H
EXPNO         1
PROCNO        1
Date_         20120403
Time_         0.41
INSTRUM       spect
PROBHD        5 mm PABBC BB-
PULPROG       zg30
TD            65536
SOLVENT       CDCl3
NS           24
DS           0
SWH           8223.695 Hz
FIDRES       0.125483 Hz
AQ           3.984637 sec
RG           32
DM           60.930 usec
DE           4.20 usec
TE           29.7
TD0          2.0000000 sec
===== CHANNEL f1 =====
NUC1          1H
P1           13.50 usec
PL1          -1.00 dB
PUL1W       10.56200695 usec
SFO1        400.1324710 MHz
SI          32768
SF          400.1300095 MHz
WDW          EM
SSB          0
LB           0.30 Hz
GB          0
PC          1.00
    
```

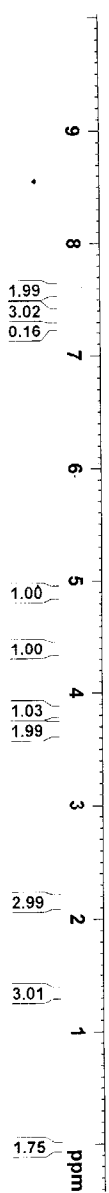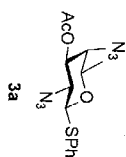

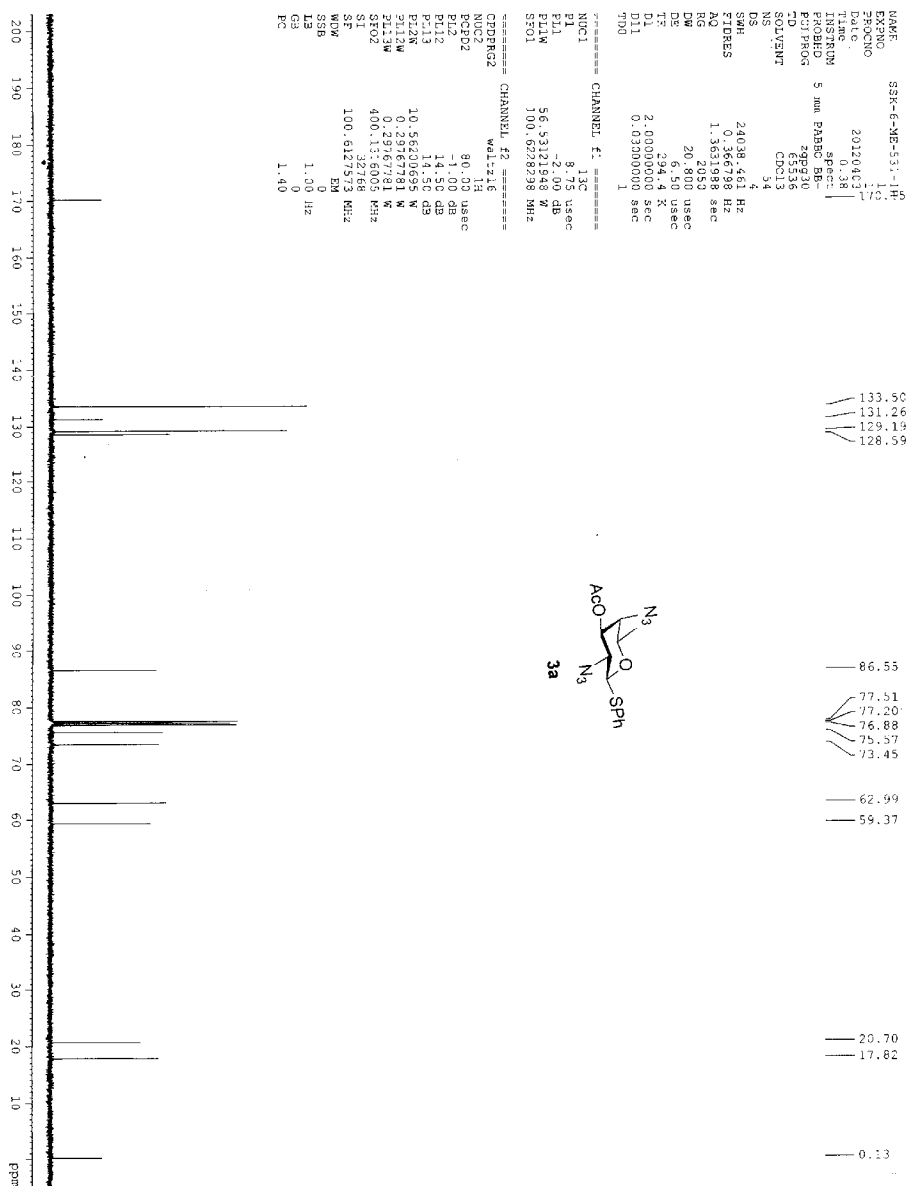

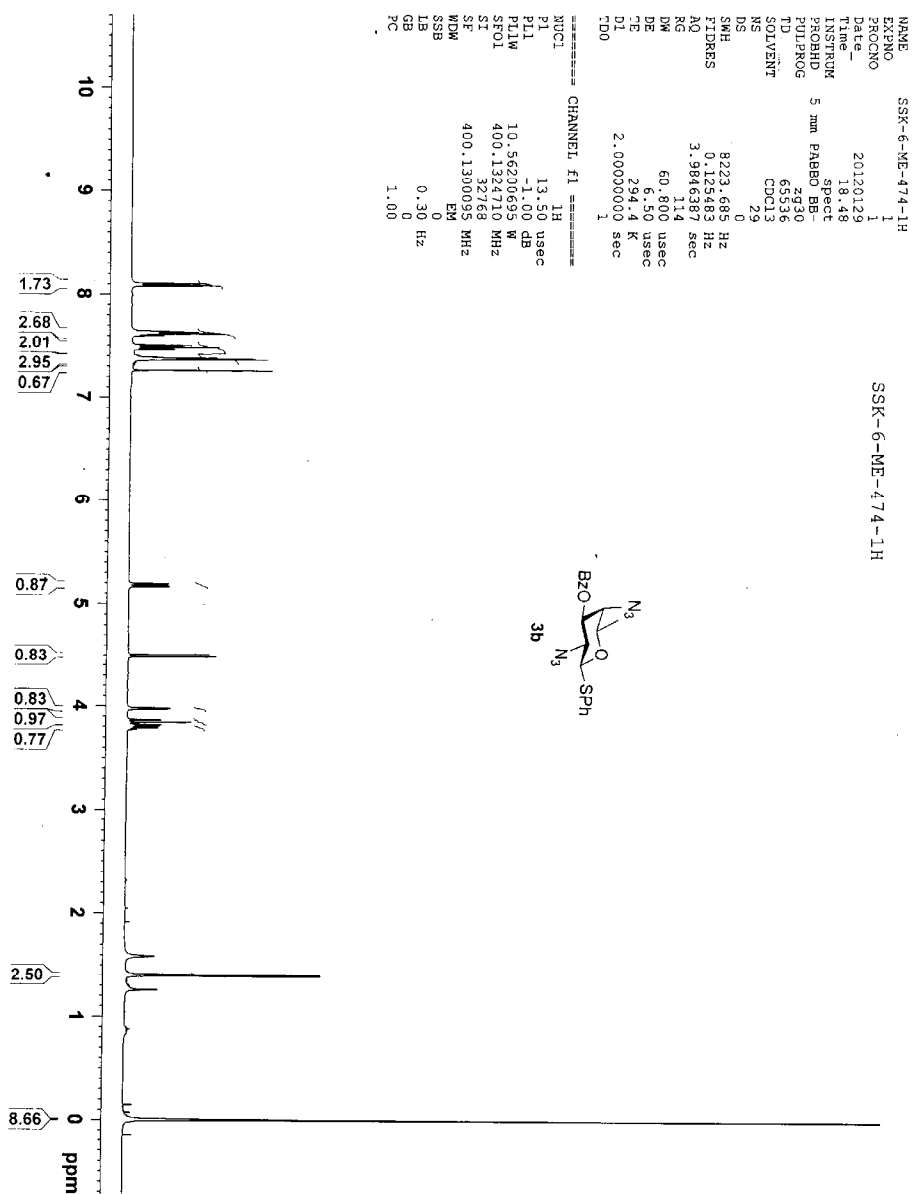

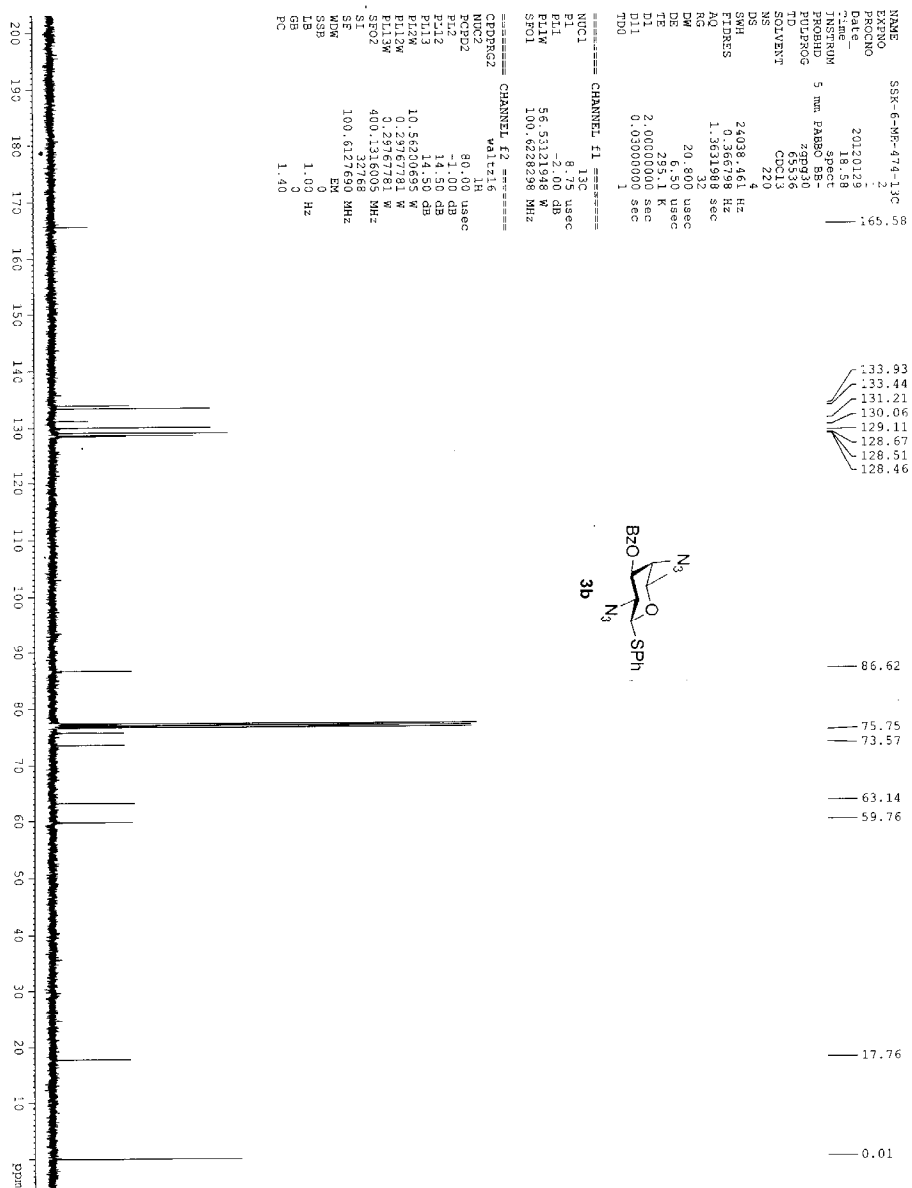

SSK-6-ME-474-COSY

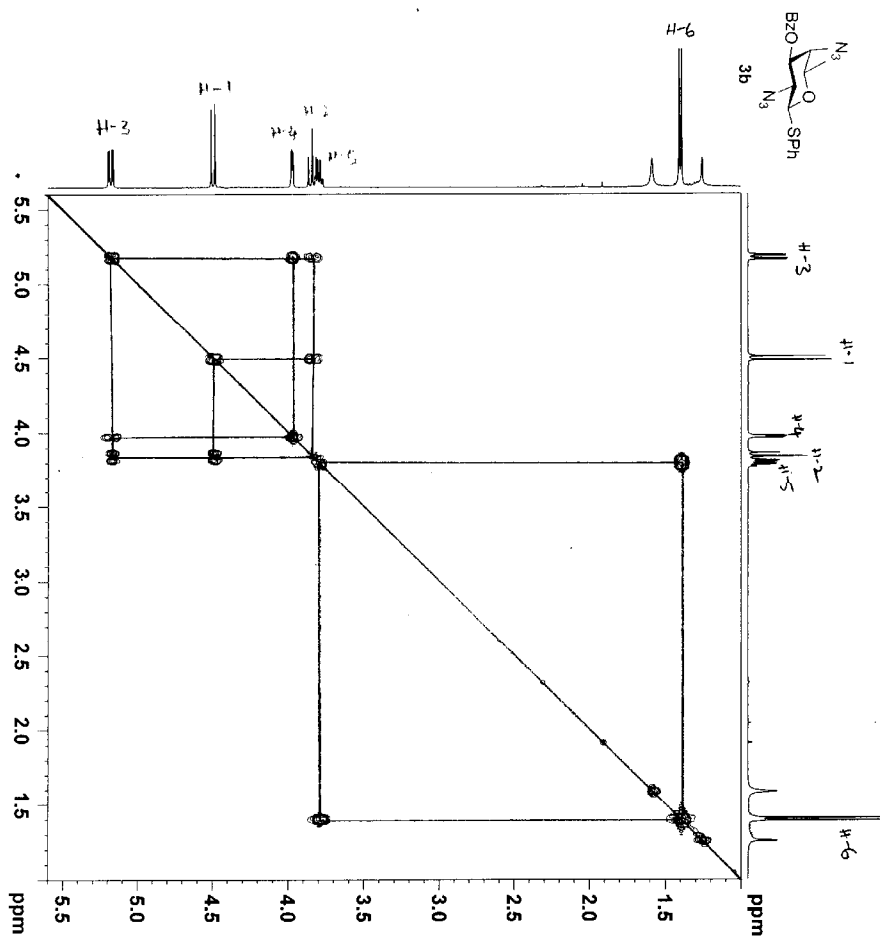

```

NAME          SSK-6-ME-474-COSY
PROCNO        1
Date          20120129
Time         20.28
INSTRUM      spect
PROBHD       5 mm PABBO BB-
PULPROG      cosyzgpg1
PC          16
SOLVENT      CDCl3
NS           16
DS           16
SWH          3472.222 Hz
FIDRES       3.350842 Hz
AQ           0.1479569 sec
RG           144.000 usec
DE           6.50 usec
TE           294.1 K
D0           0.00000300 sec
D1           1.00000000 sec
D12          0.00000400 sec
D13          0.00000000 sec
IN0          0.00028900 sec

===== CHANNEL F1 =====
NUC1          1H
P0           13.50 usec
F1           13.50 usec
M0           1.00 dB
FILLW        10.56200595 W
SFO1          400.1315810 MHz

===== GRADIENT CHANNEL =====
GRANA1       SINE.100
GEZ1         10.00 %
M10         1000.00 usec
TD           203
SF01         400.1315 MHz
FIDRES       17.104542 Hz
SW           8.678 ppm
FNAME        QZ
SI           238
S1           400.1300095 MHz
WDW          SINE
SSB          0
LB           0.00 Hz
GB           0
CB           1.40
CT           5.00
CF           5.00
NC2          0
SE           400.1300095 MHz
MDW          SINE
SSB          0
LB           0.00 Hz
GB           0
    
```

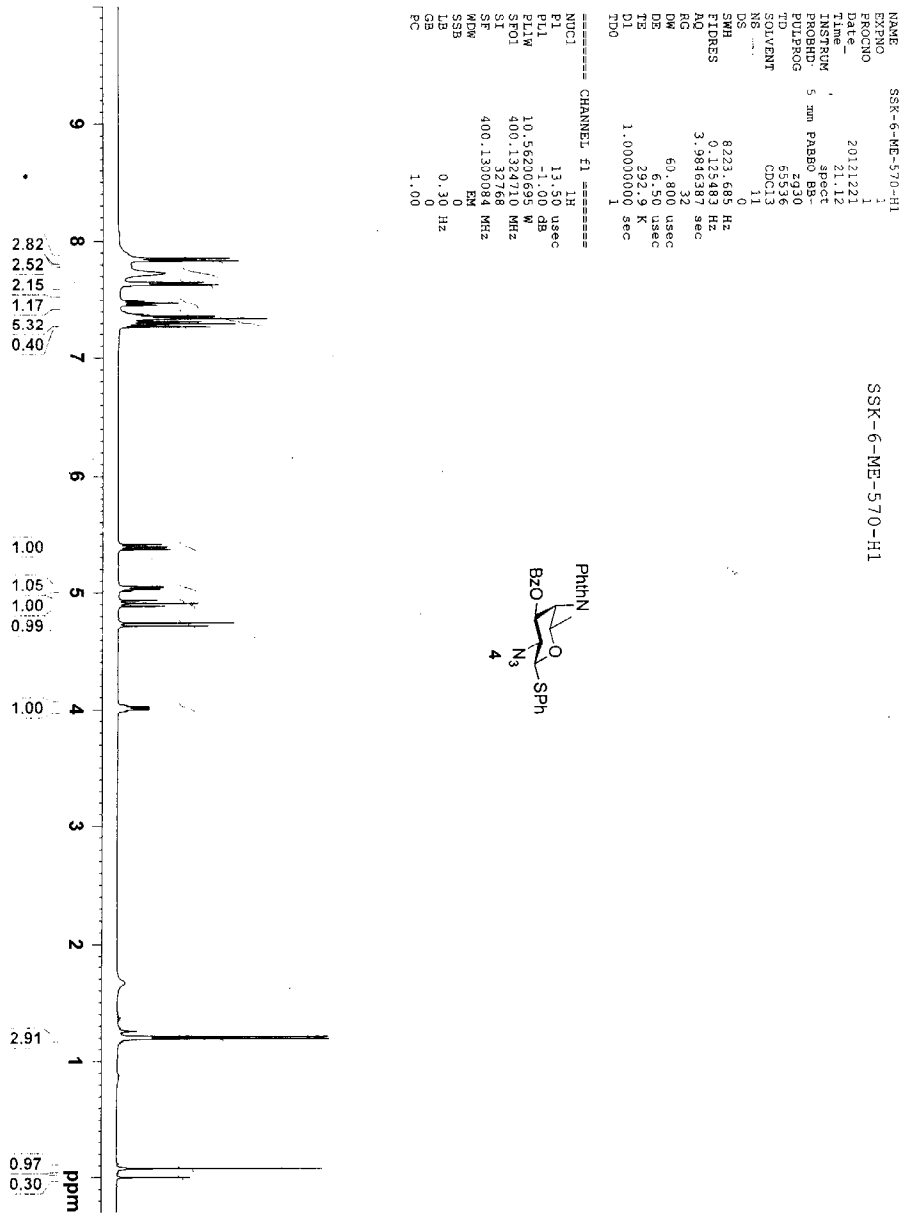



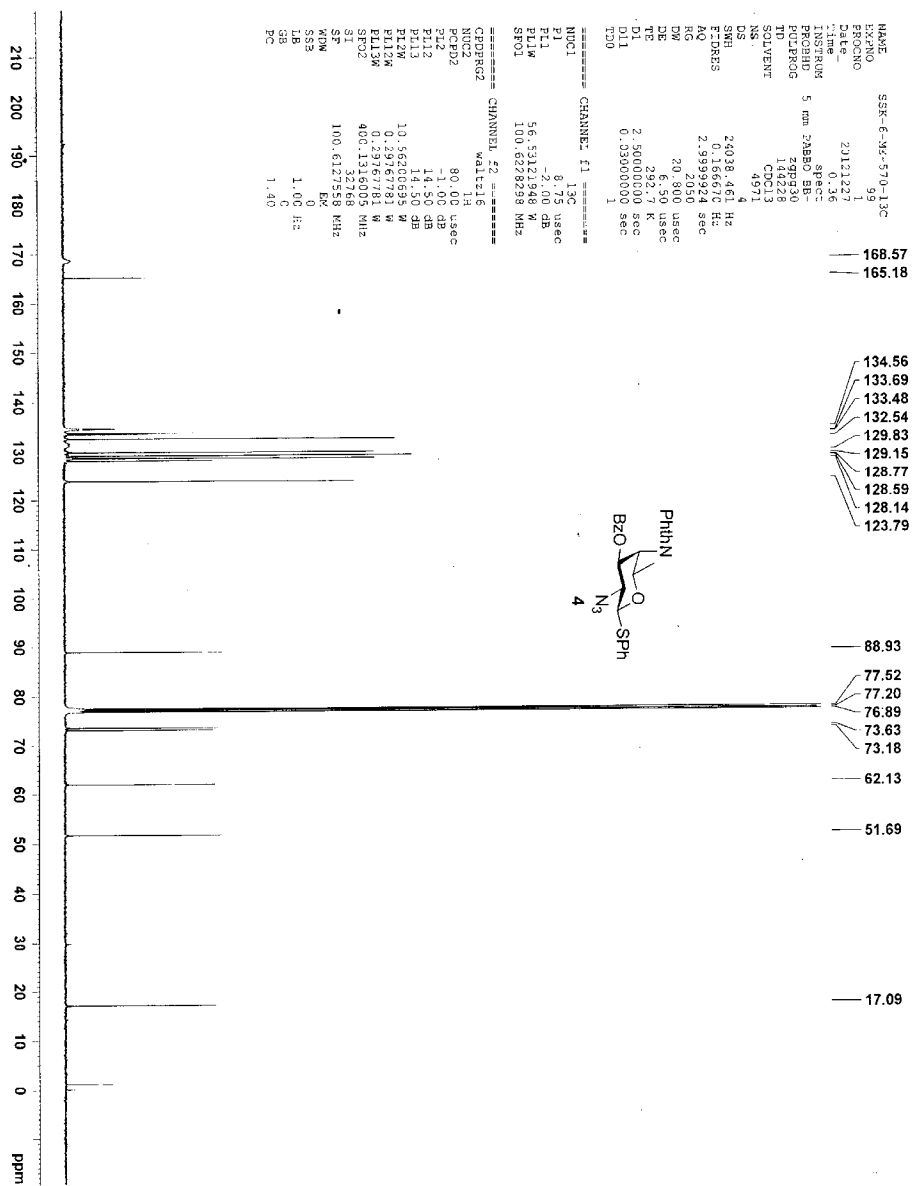

SSK-6-ME-570-COSY

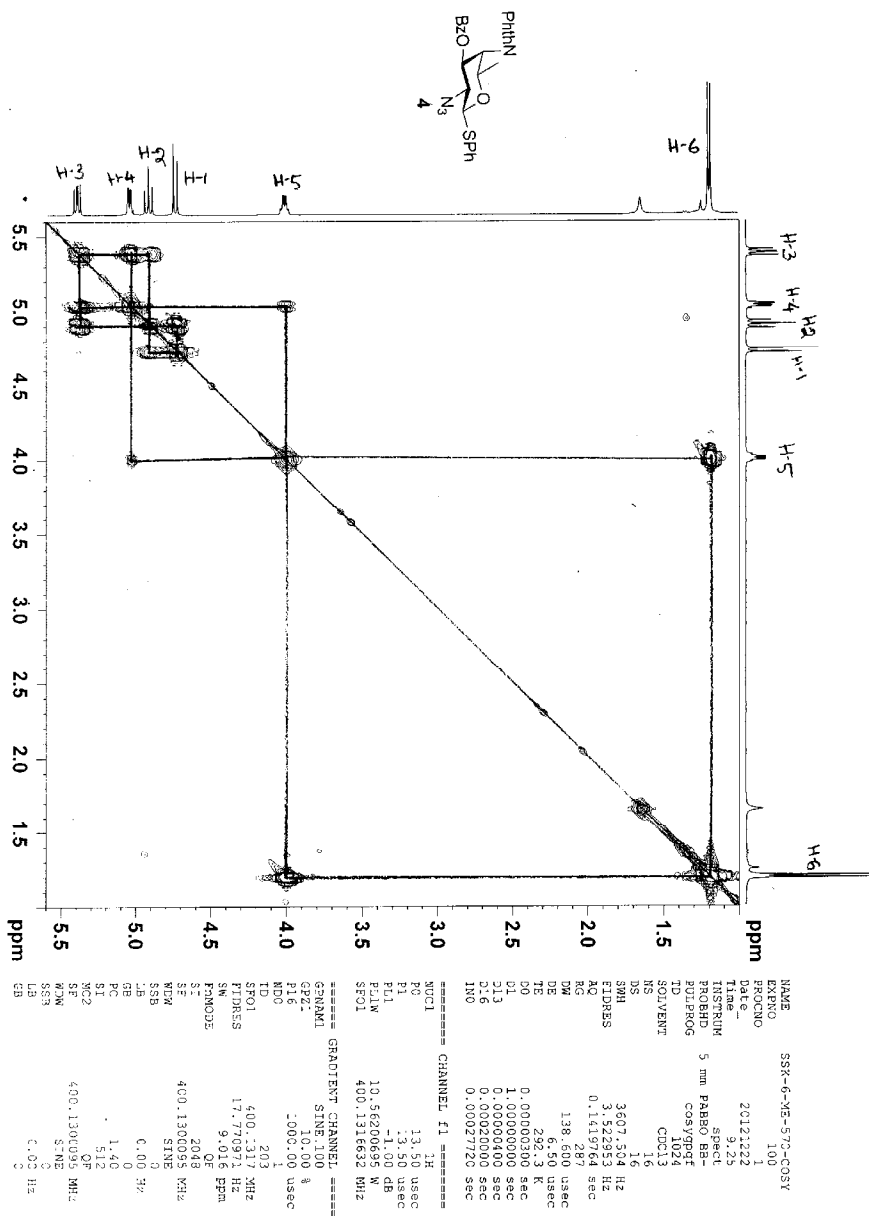

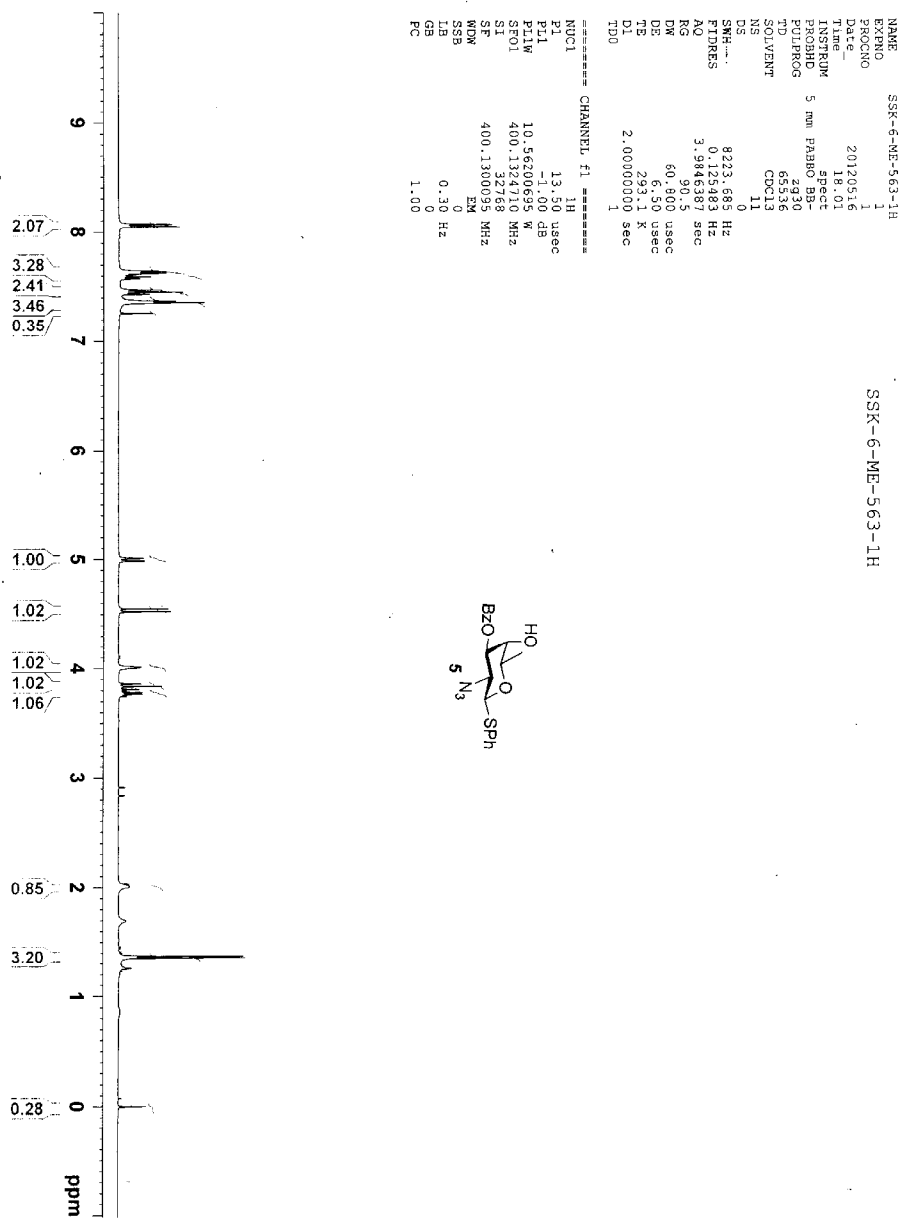

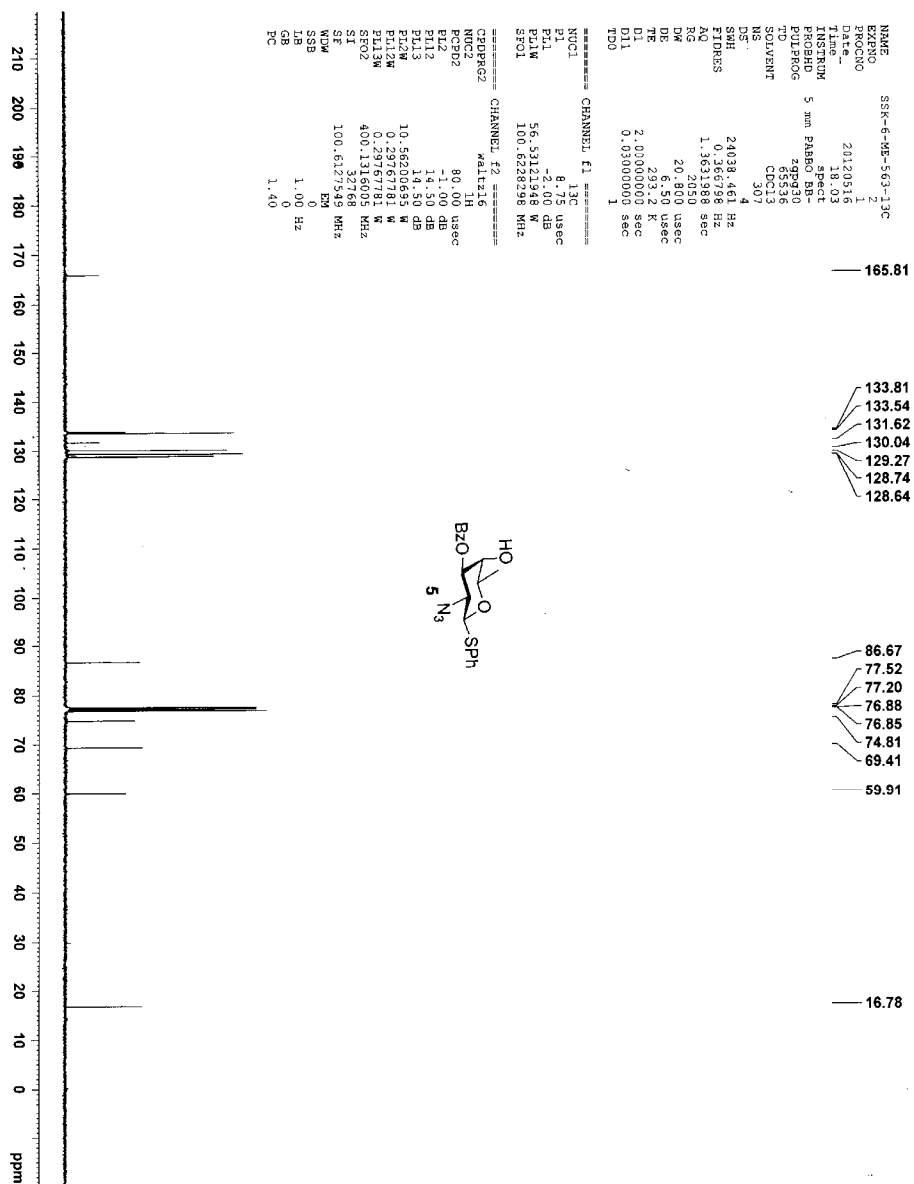

SSK-6-VE-363-COSY

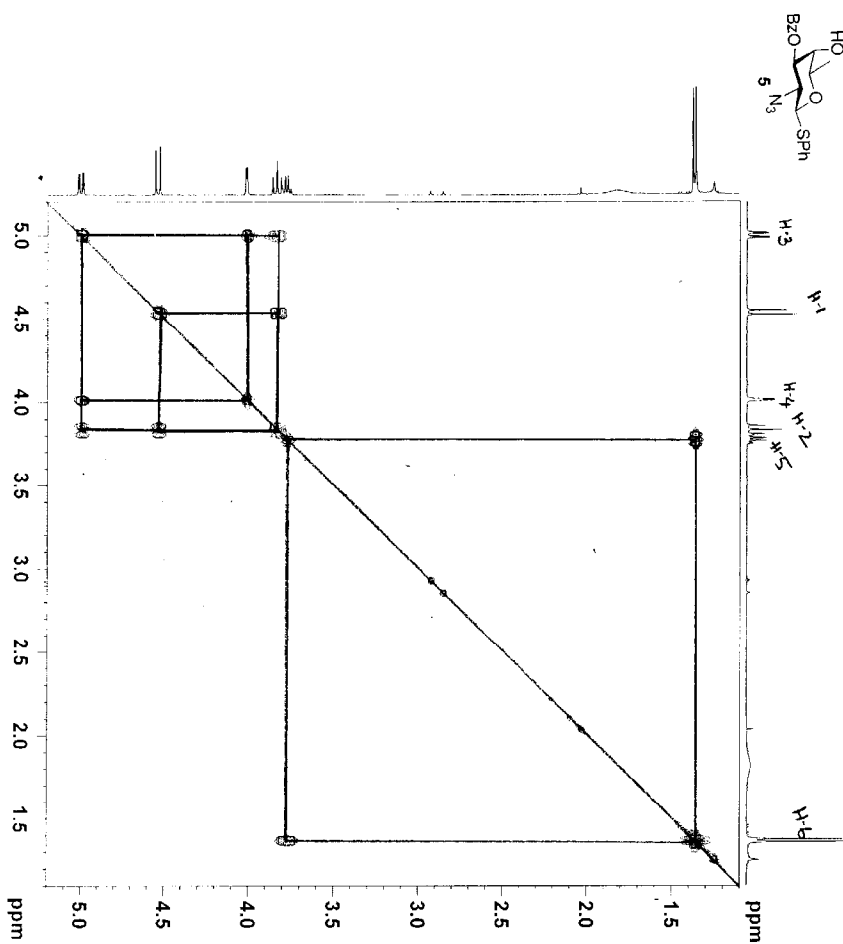

```
NAME: SSK-6-VE-363-COSY
EXPNO: 1
PROCNO: 1
Date_ : 20120519
Time: 14.54
INSTRUM: spect
PROBHD: 5 mm BBO BBP
PULPROG: zgpg30
TD: 65536
SOLVENT: CDCl3
NS: 32
DS: 4
AQ: 2.785671 sec
RG: 0.1794578 sec
SI: 175.200 usec
SF: 61.90 usec
DE: 253.1 K
TE: 1.0072000 sec
PC: 0.00020400 sec
DQ: 0.00020000 sec
C16: 0.00020000 sec
LMO: 0.00030000 sec
===== CHANNEL f1 =====
NUC1: 13C
P1: 13.50 usec
PL1: 0.00 dB
SFO1: 101.625000 MHz
===== CHANNEL G2 =====
NAME: G2
P16: 1.00 usec
PL16: 0.00 dB
SFO16: 400.1360995 MHz
===== CHANNEL G3 =====
NAME: G3
P16: 1.00 usec
PL16: 0.00 dB
SFO16: 400.1360995 MHz
===== CHANNEL G4 =====
NAME: G4
P16: 1.00 usec
PL16: 0.00 dB
SFO16: 400.1360995 MHz
===== CHANNEL G5 =====
NAME: G5
P16: 1.00 usec
PL16: 0.00 dB
SFO16: 400.1360995 MHz
===== CHANNEL G6 =====
NAME: G6
P16: 1.00 usec
PL16: 0.00 dB
SFO16: 400.1360995 MHz
```

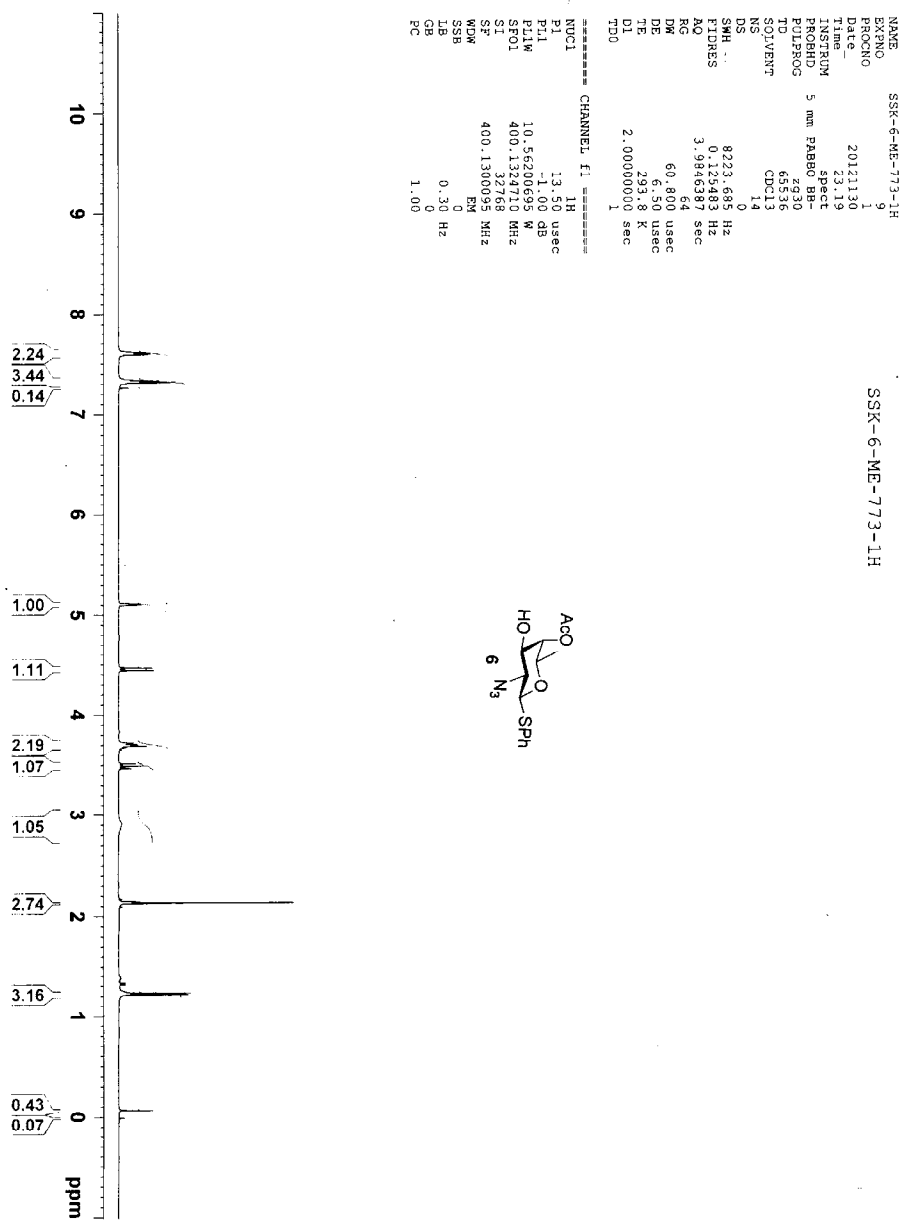

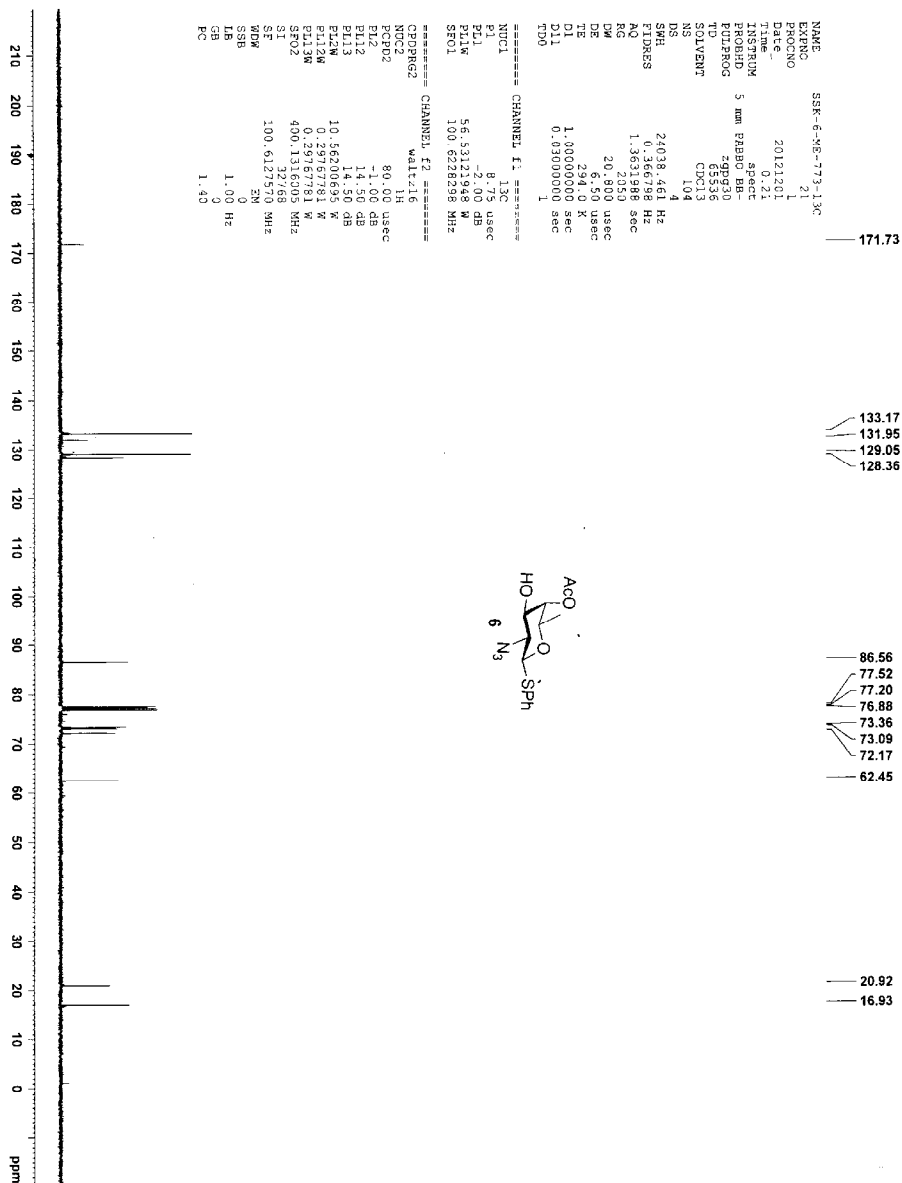

SSK-6-ME-773-COSY

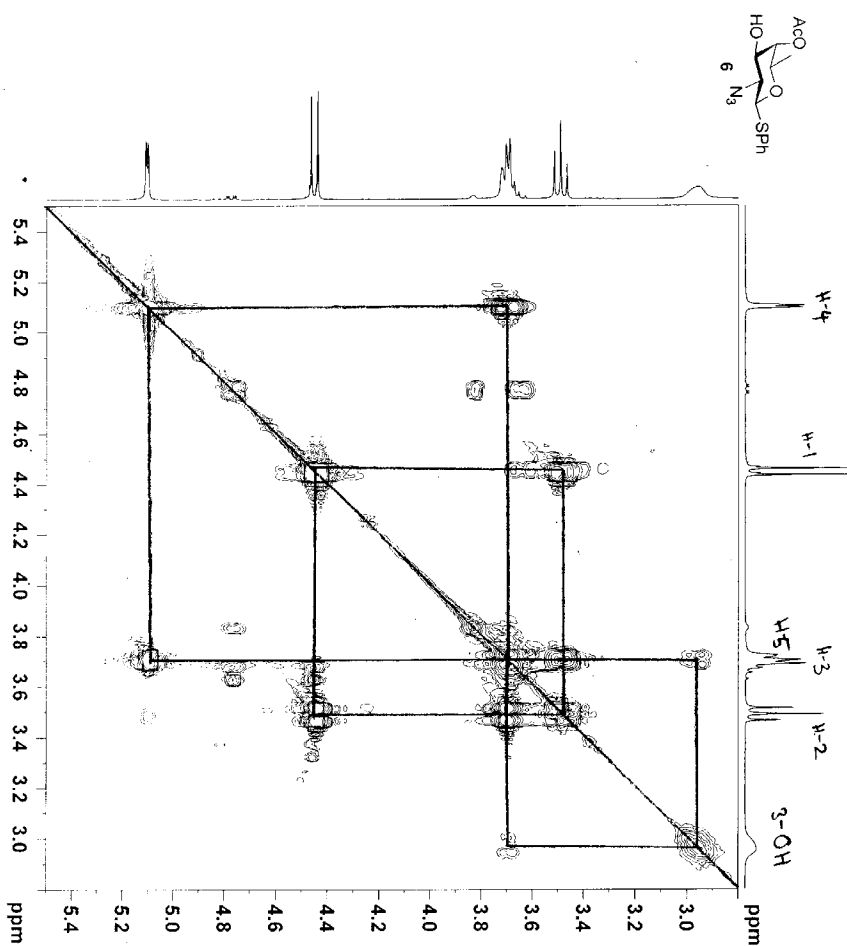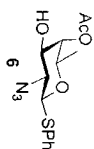

```

NAME          SSK-6-ME-773-COSY
EXPNO         200
PROCNO        1
Date_         20121202
Time          22.06
INSTRUM       spect
PROBHD        5 mm PABBO-140
PULPROG       zgpg30
TD            1074
SOLVENT       CDCl3
NS            16
DS            1
SWH           3311.258 Hz
F2           31213.414 Hz
P1           0.1546730 sec
RG           144
AQ           15.000 usec
DE           6.50 usec
TE           283.2 K
D1           0.0020000 sec
D13          0.00020000 sec
D16          0.00020000 sec
TMO          0.00036200 sec

===== CHANNEL f1 =====
NUC1          13
P1            13.50 usec
PL1           -1.00 dB
PL12          10.56200695 dB
SFO1          100.1315442 MHz

===== GRADIENT CHANNEL =====
SFO1          400.1300985 MHz
SP21         10.00 %
P16          1000.00 usec
NUC2          1
SFO2          400.1315 MHz
SFO3          14.16950 MHz
SFO4          9.44 %
F2MODE       OF
SI           2048
SF           400.1300985 MHz
WDW          SINE
SSB          0
GB           2.00 Hz
PC           1.40
SI           512
SF           400.1300985 MHz
SFO5          9.44 MHz
GB           2
    
```



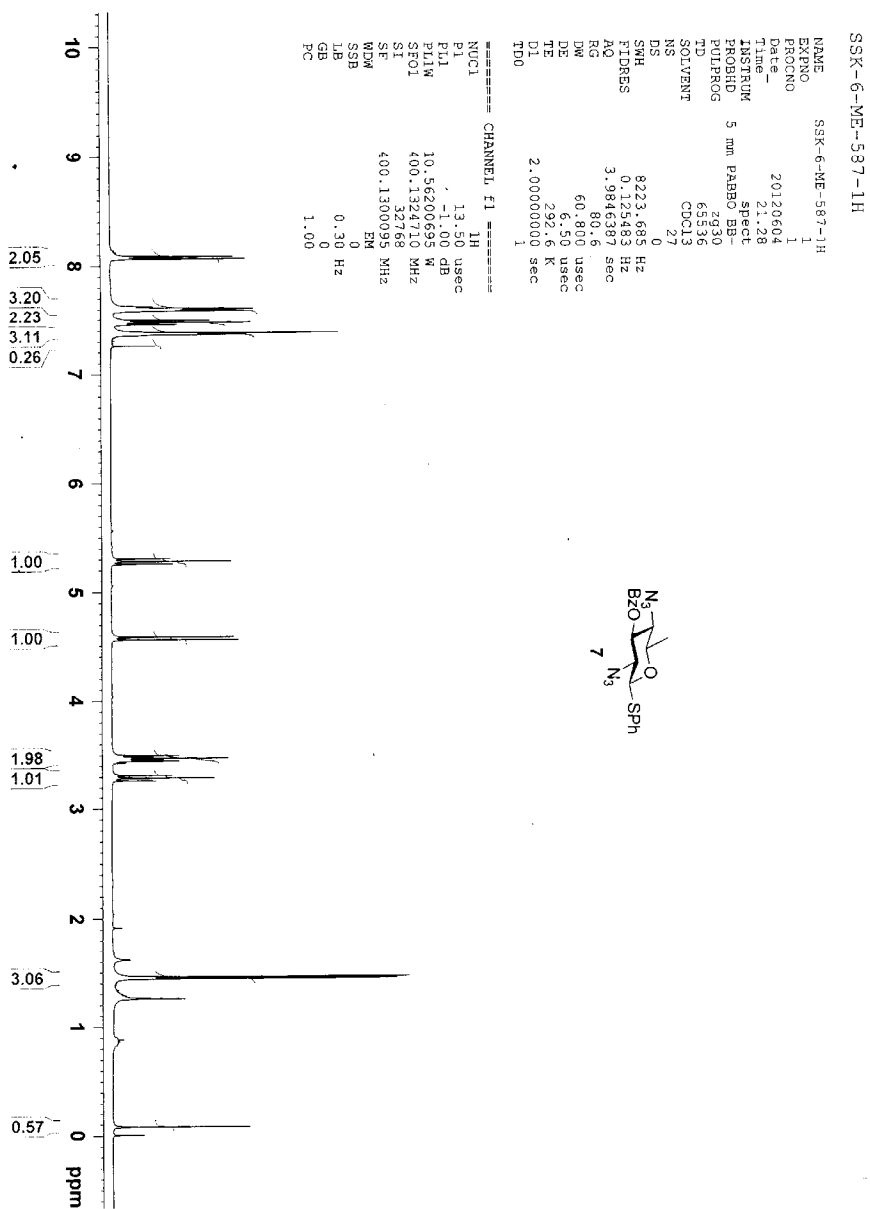

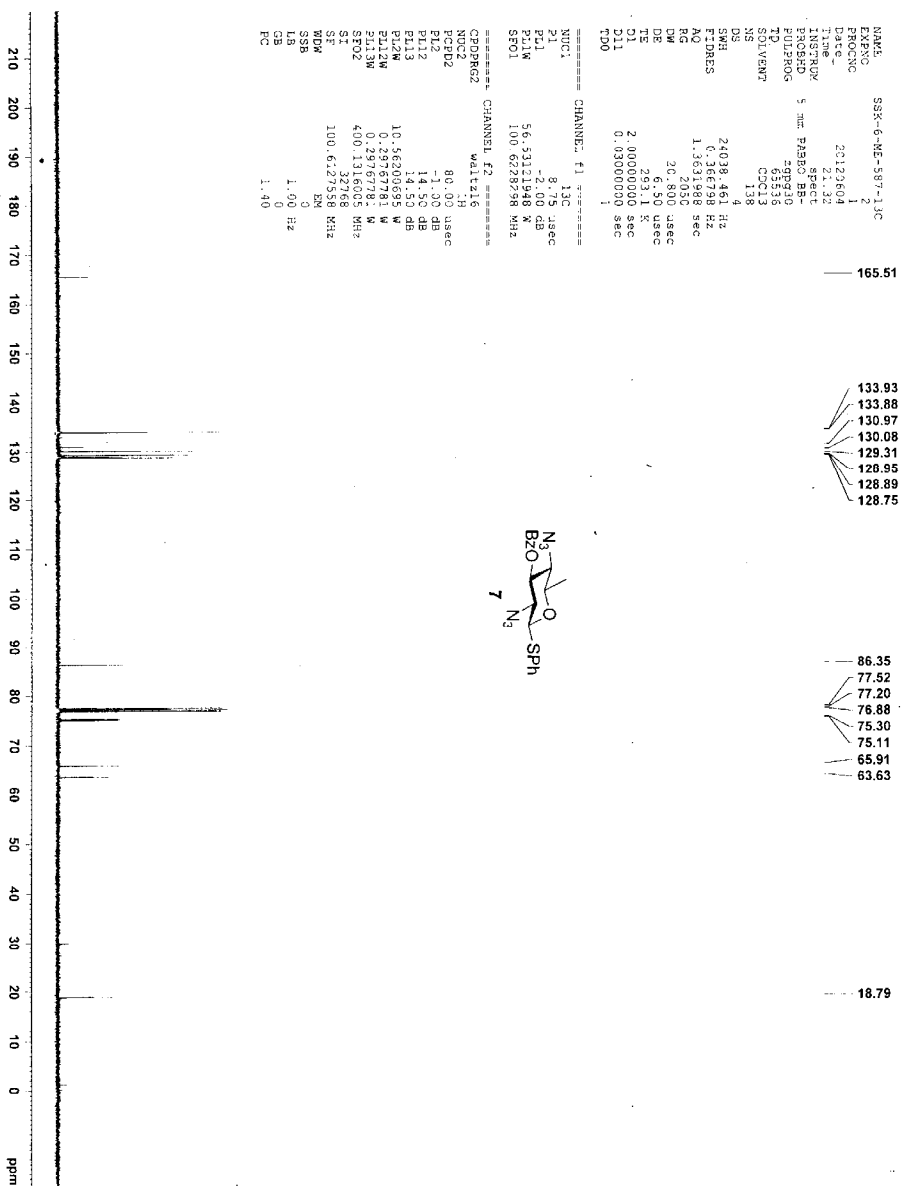

SR-6-ME-587-COSY

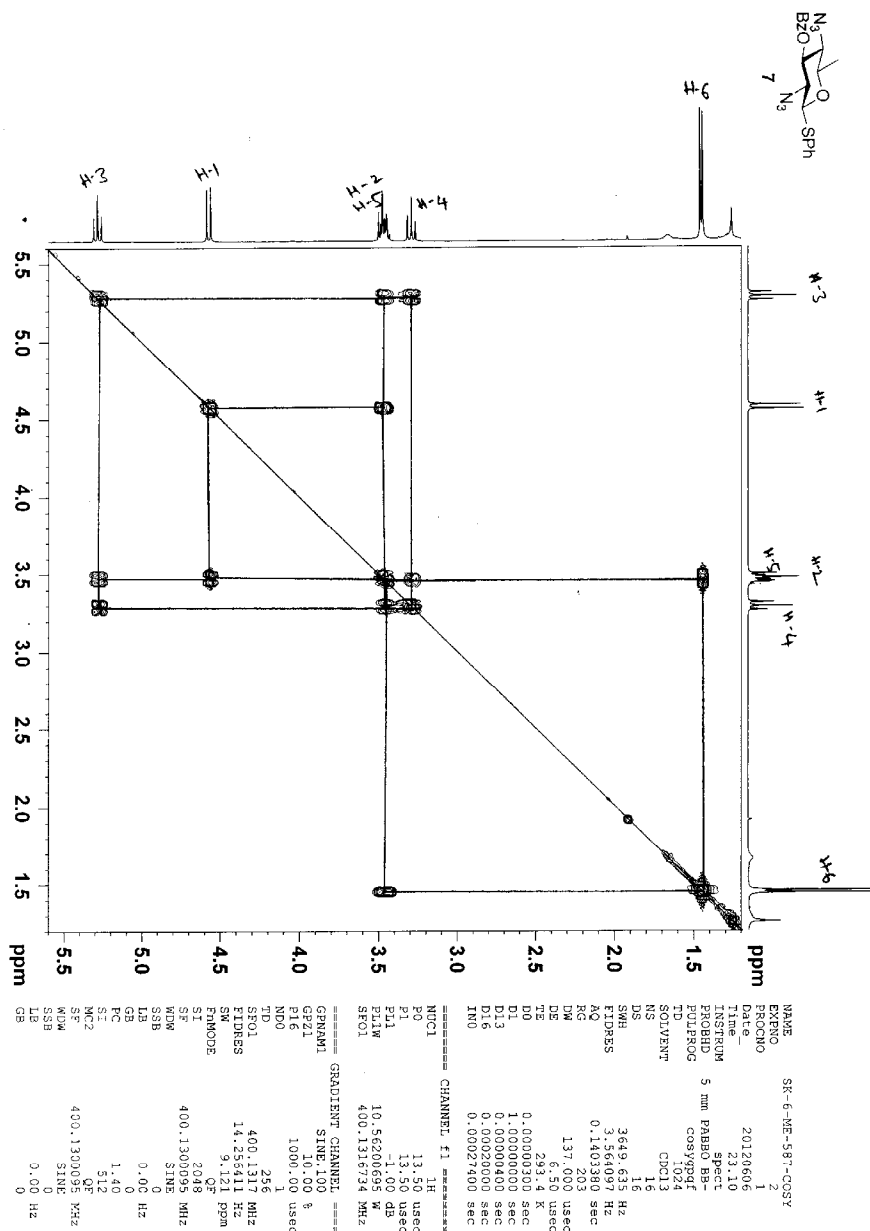

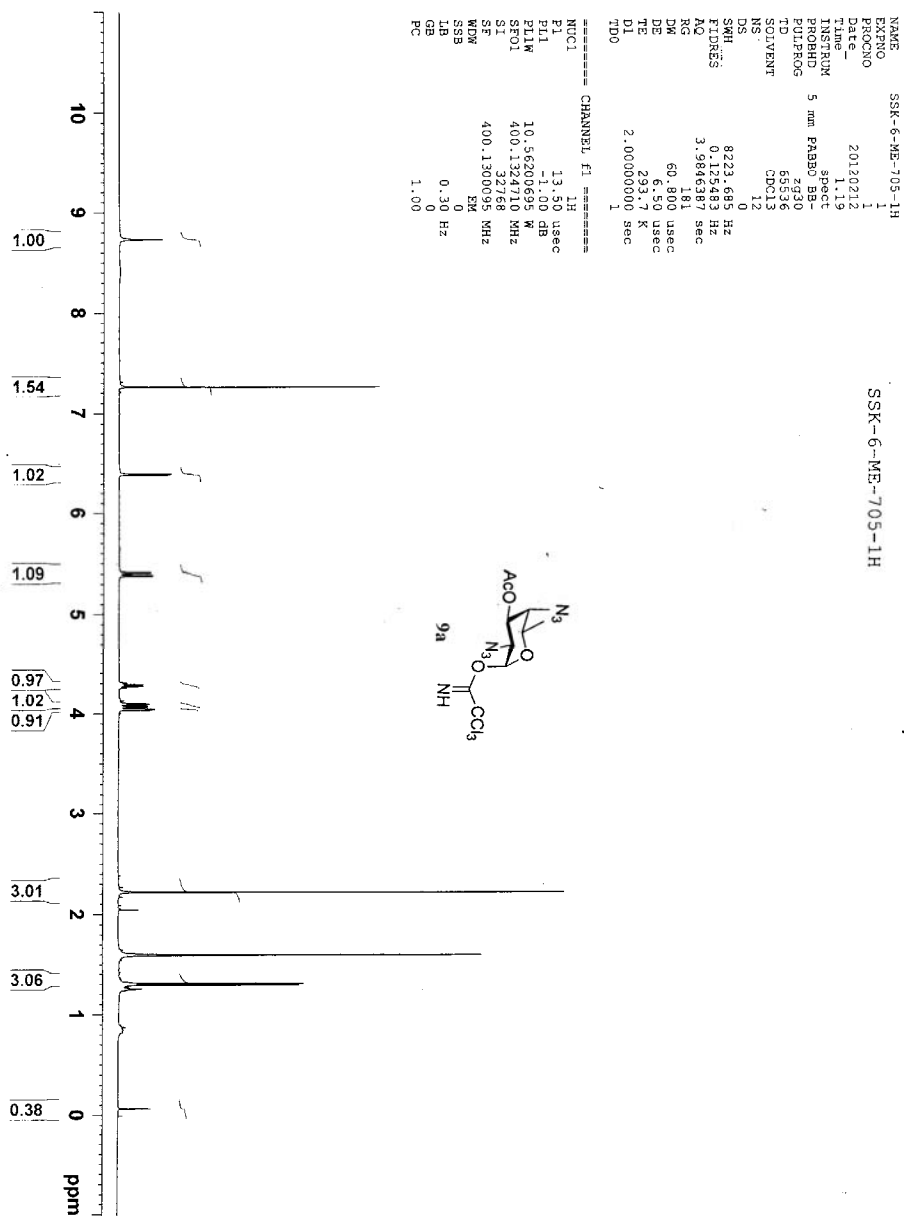

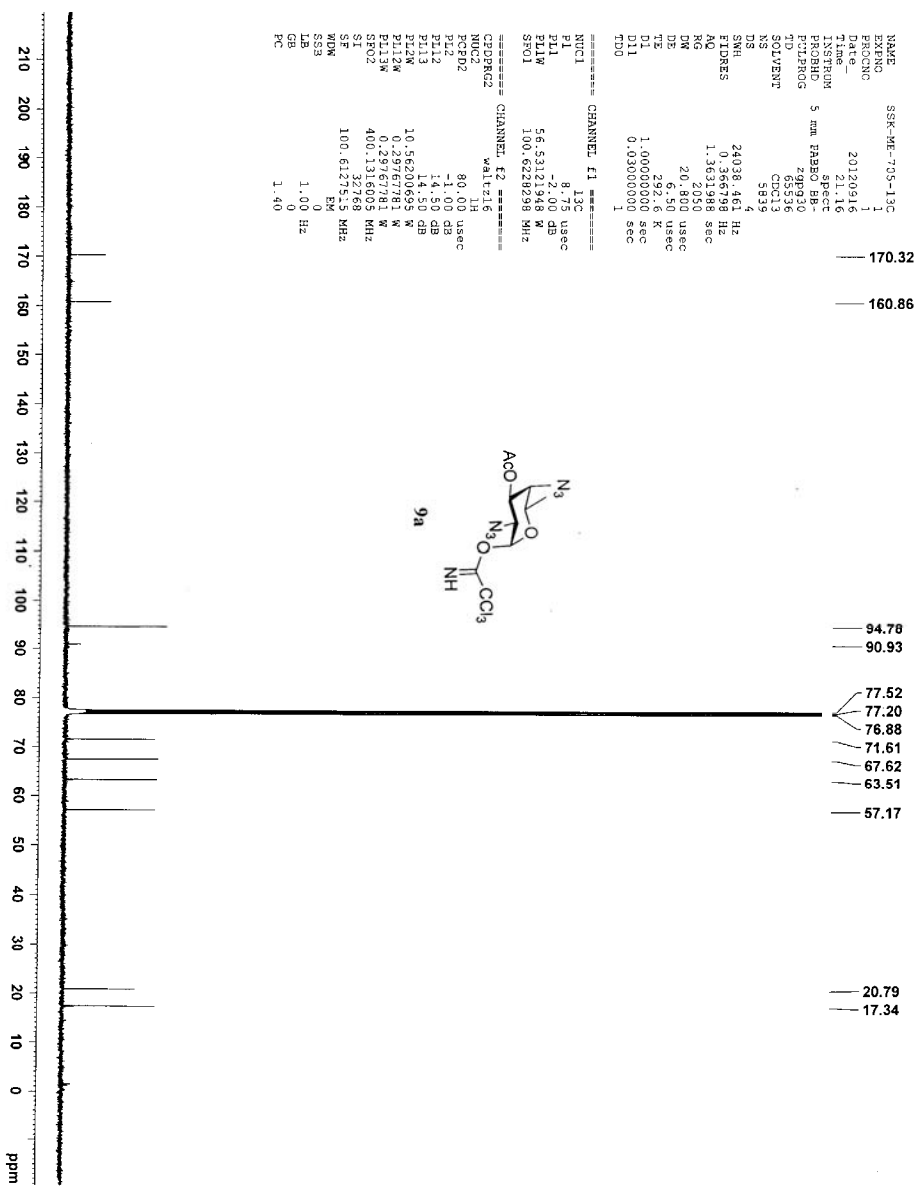

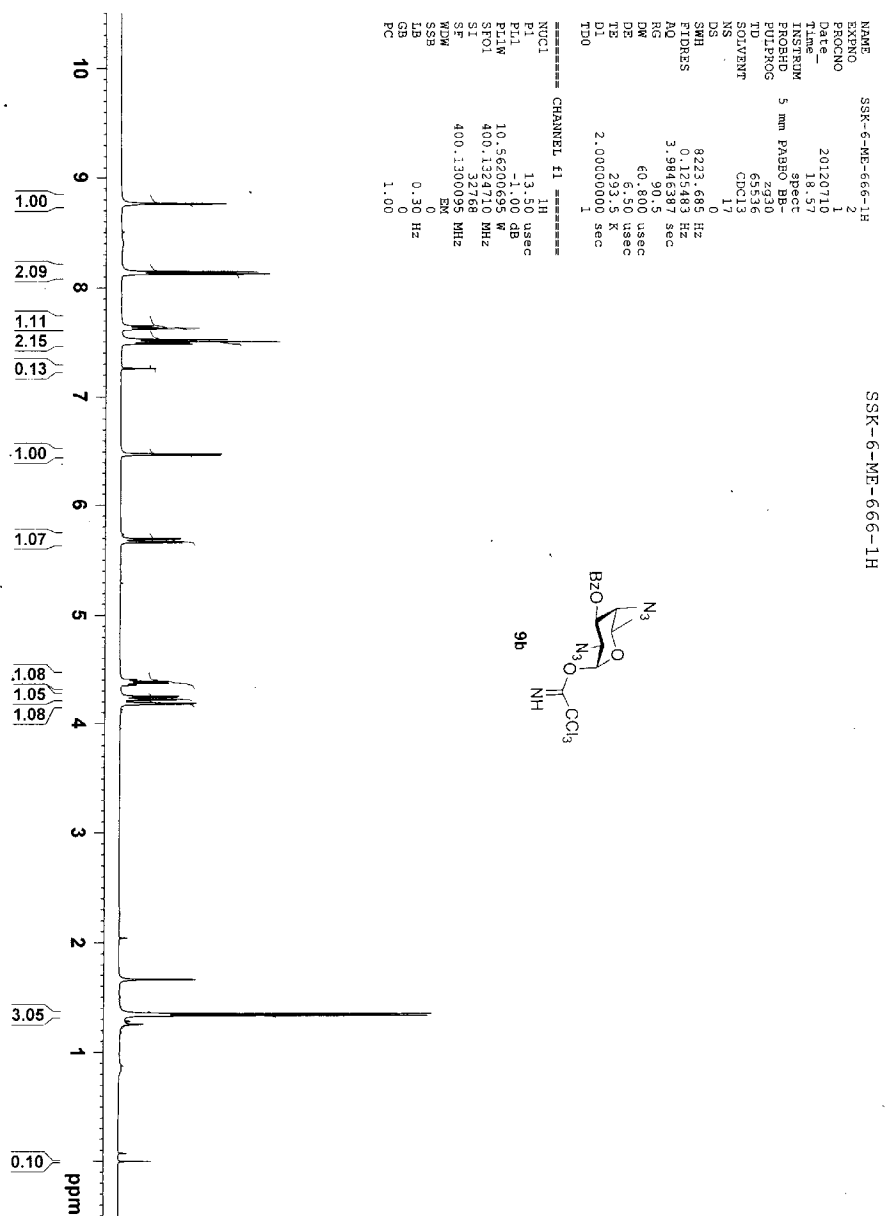

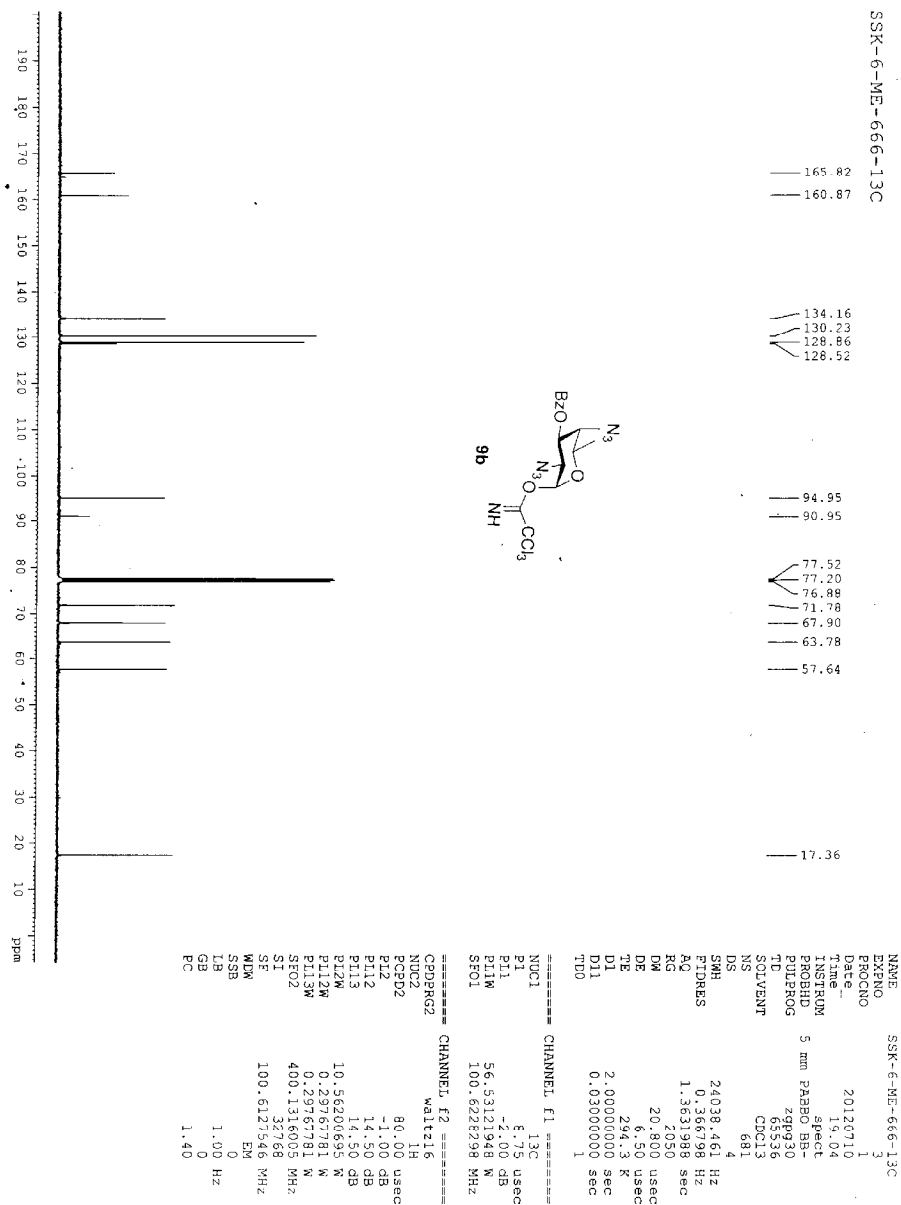

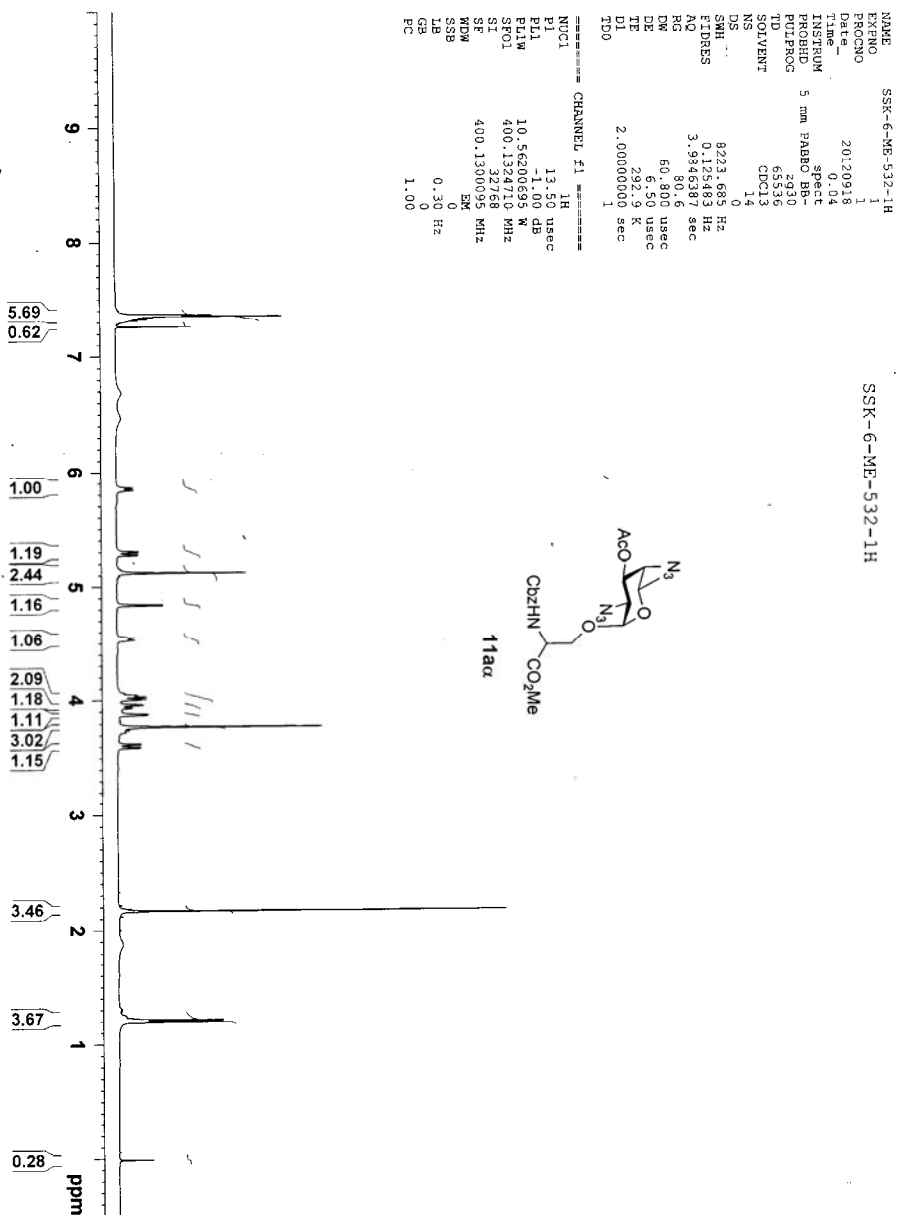



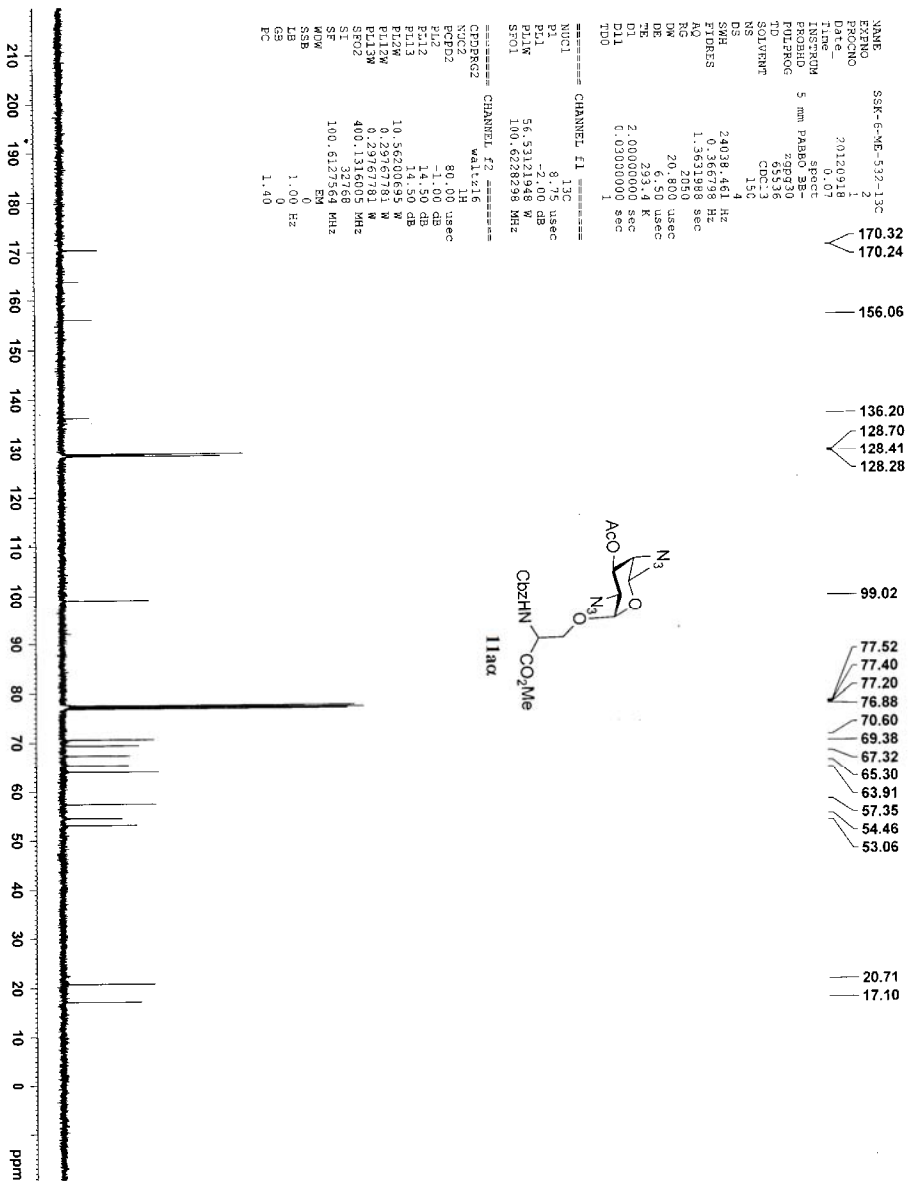

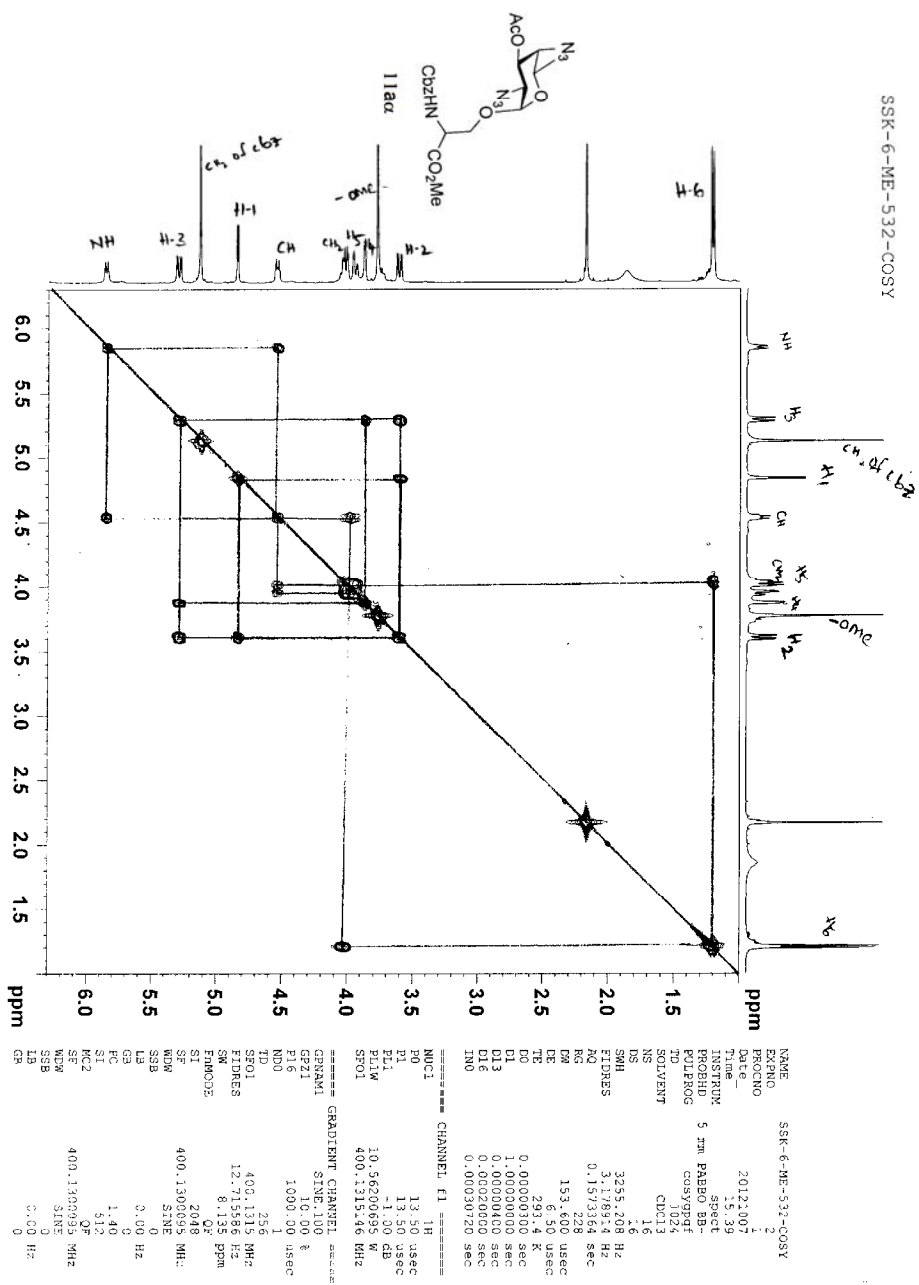

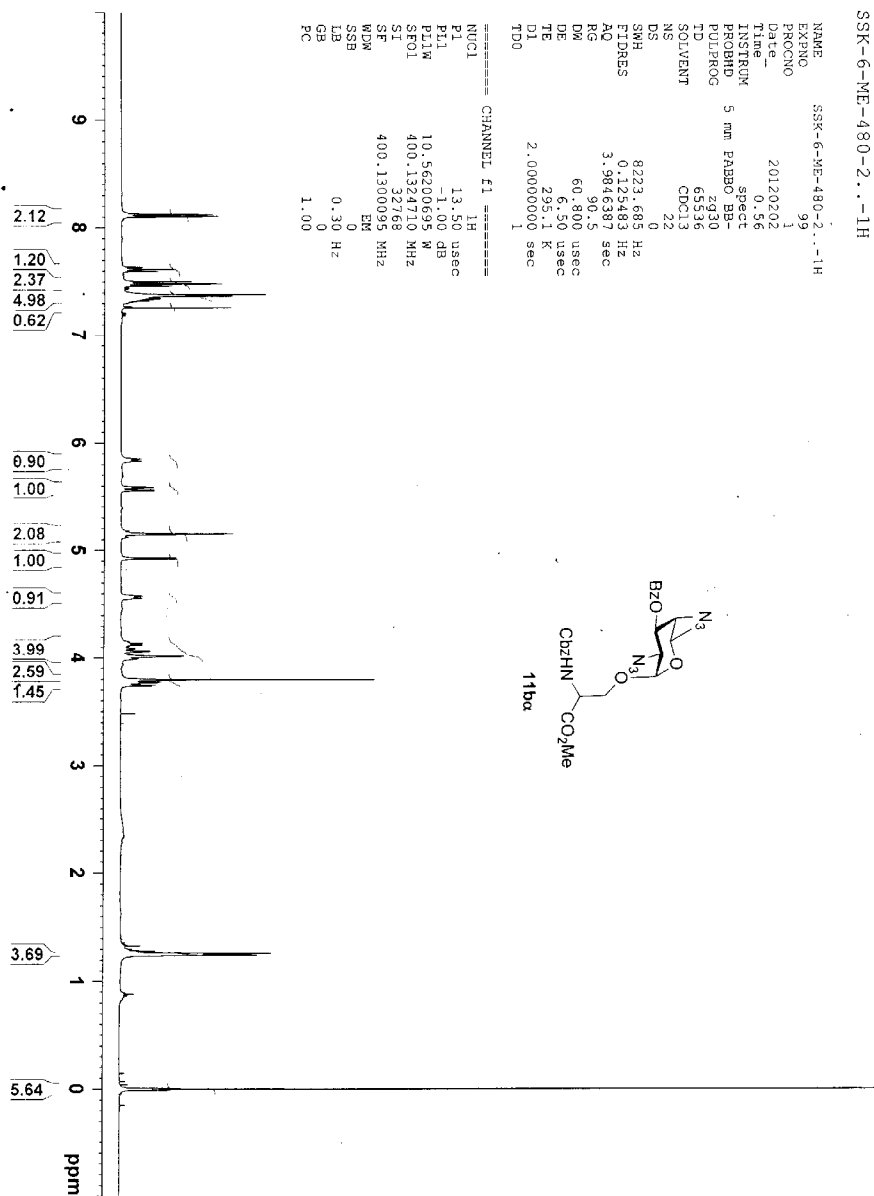

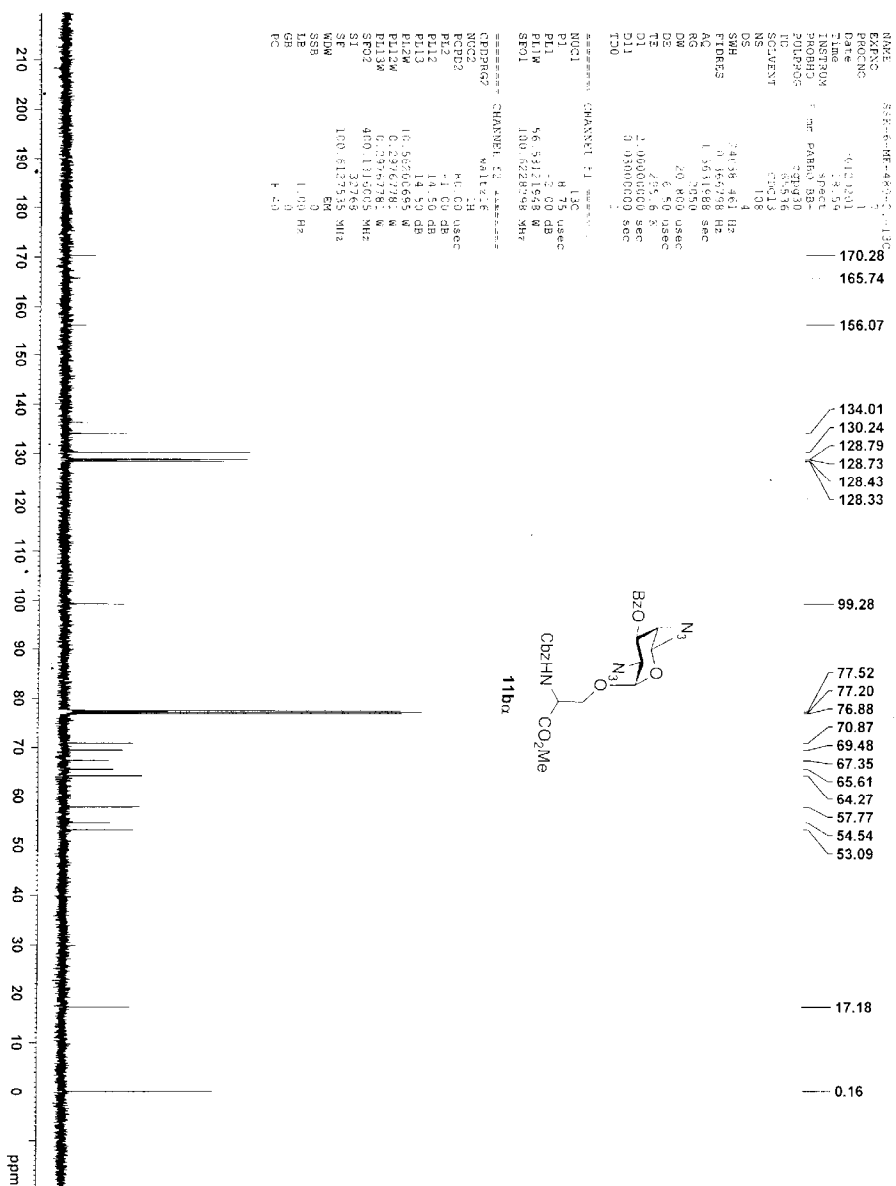

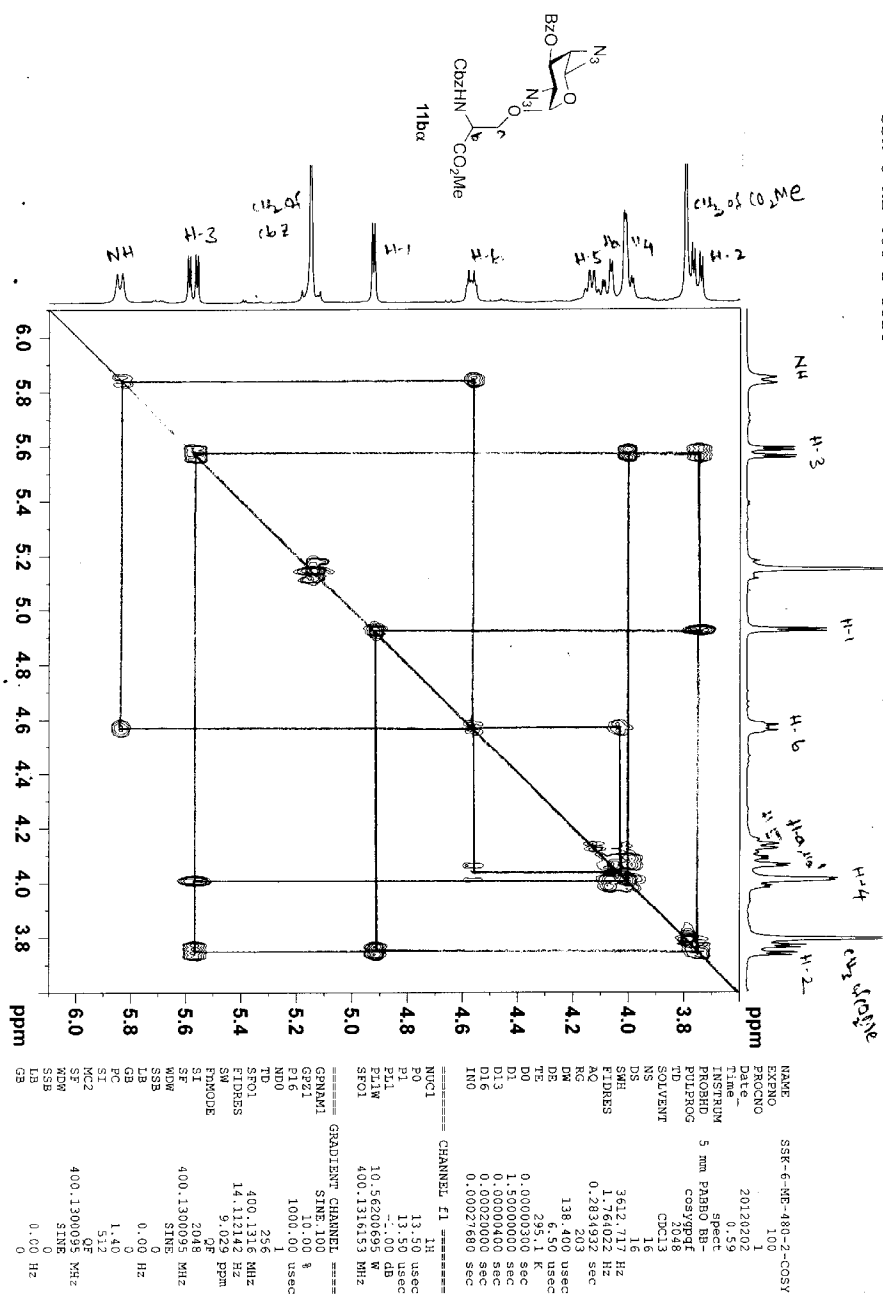

SSK-6-ME-480-3-1H

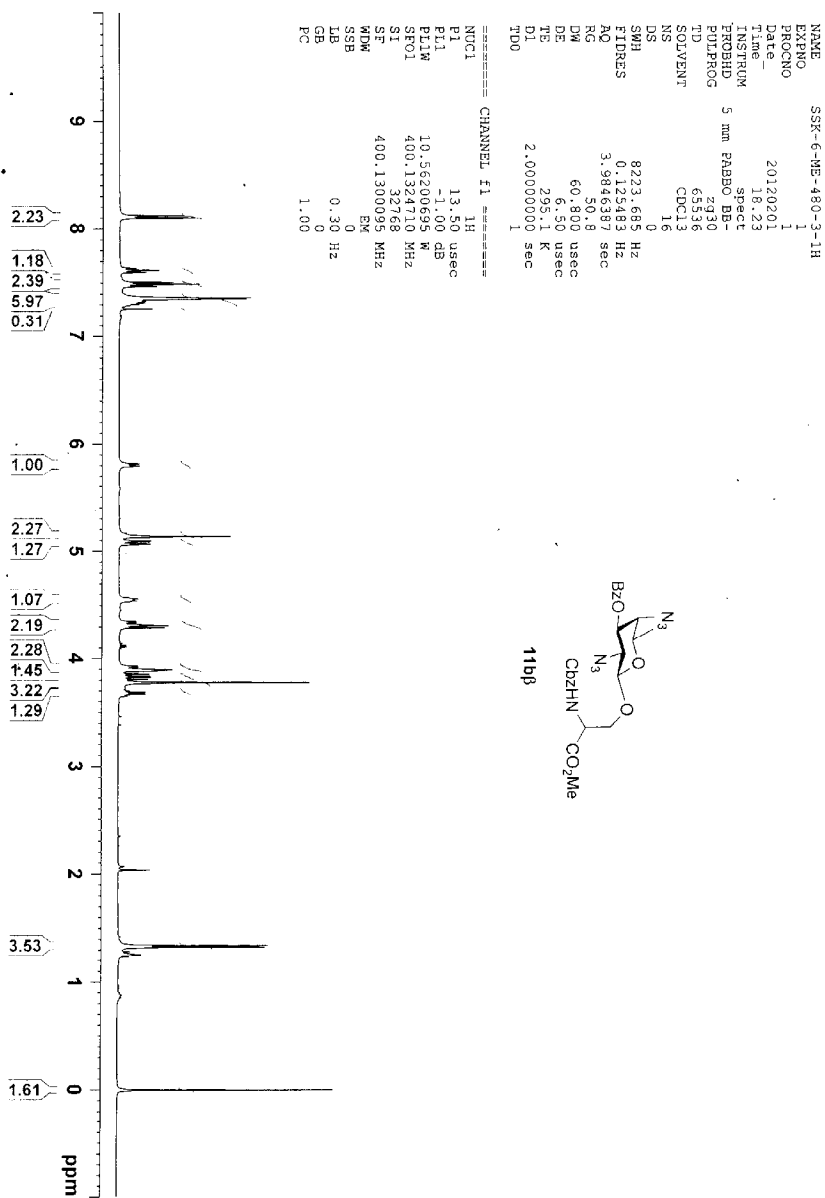

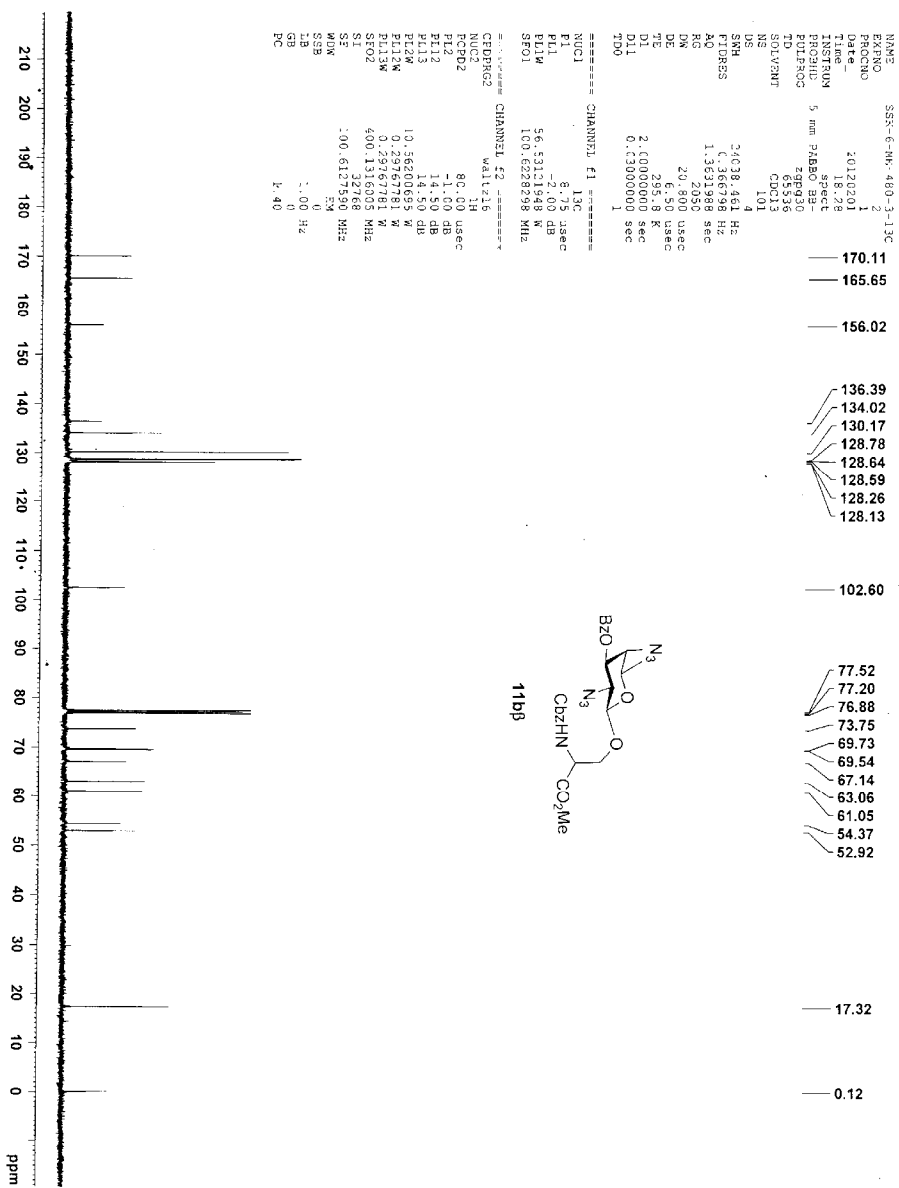

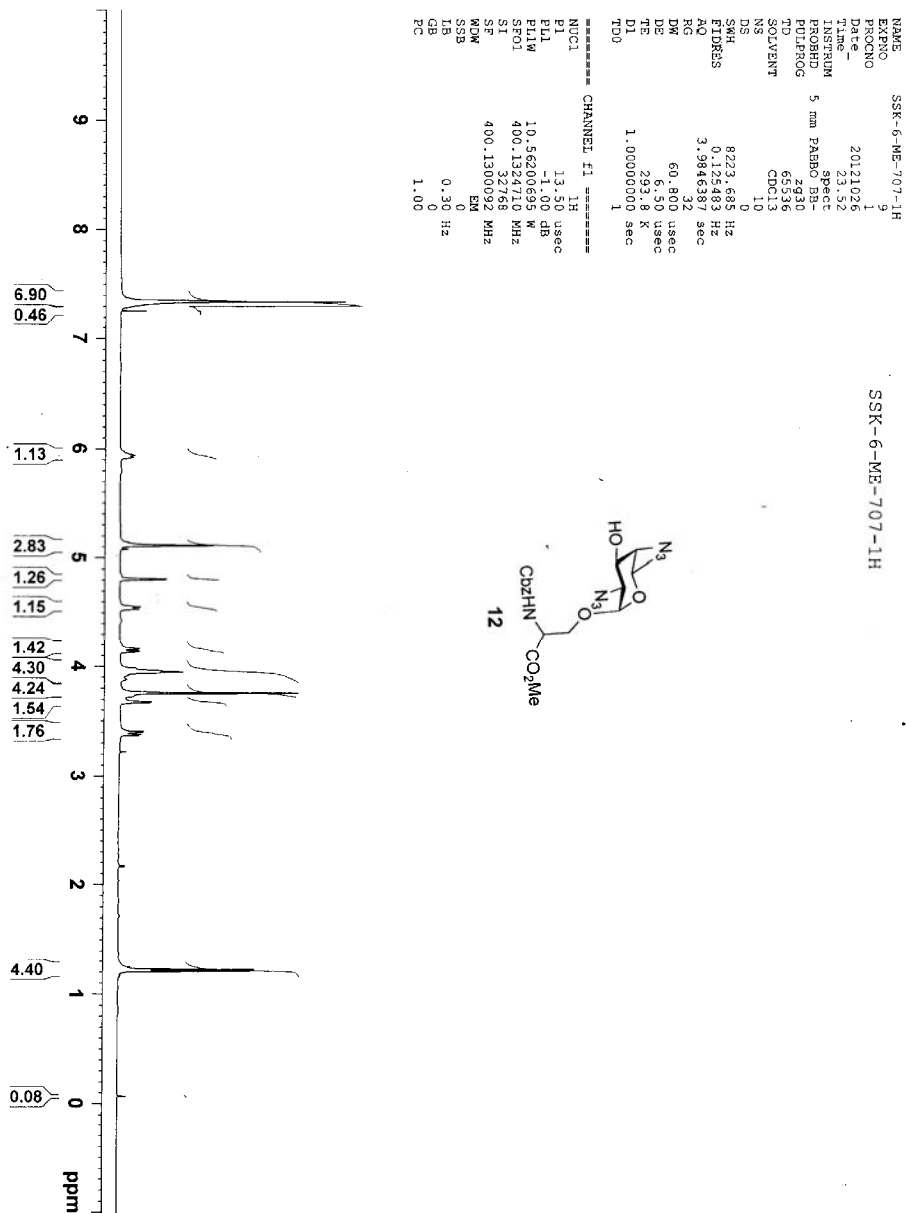



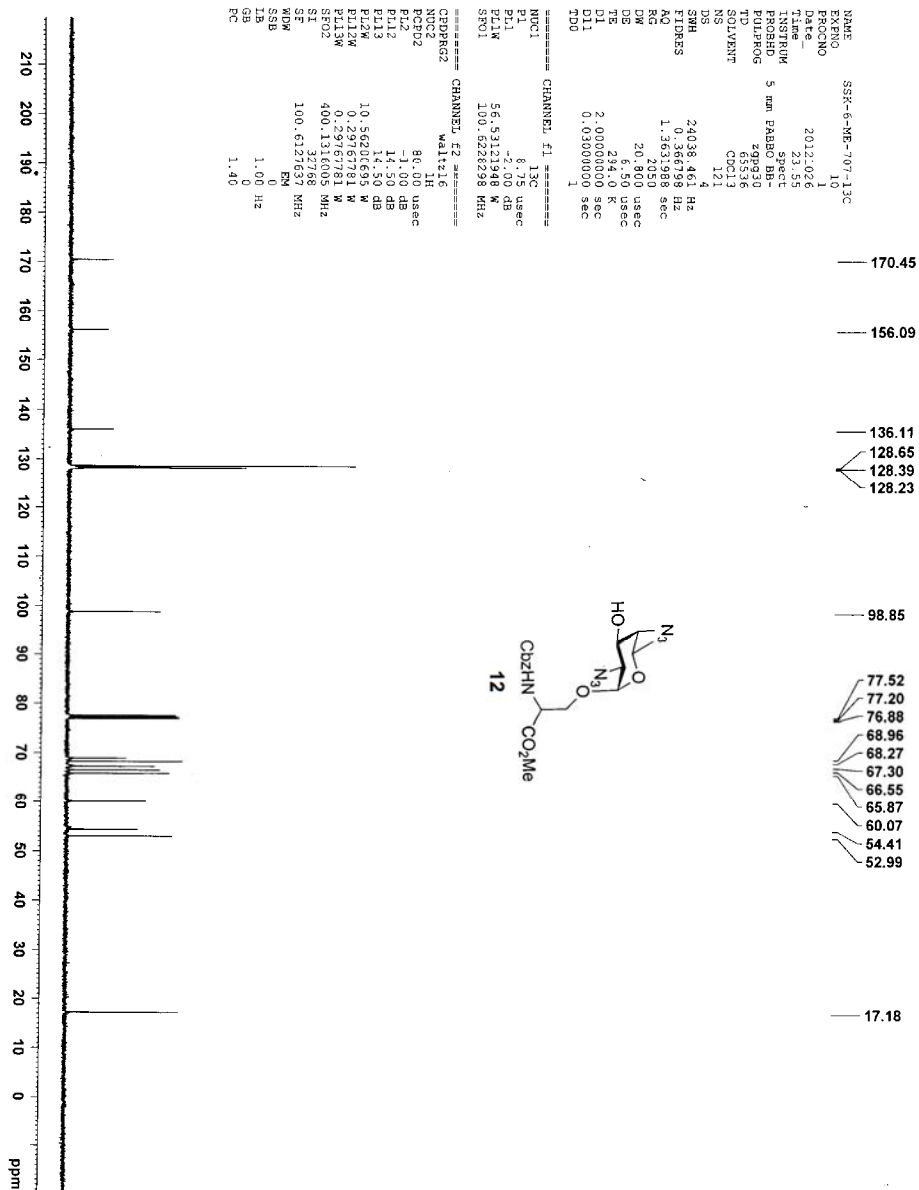

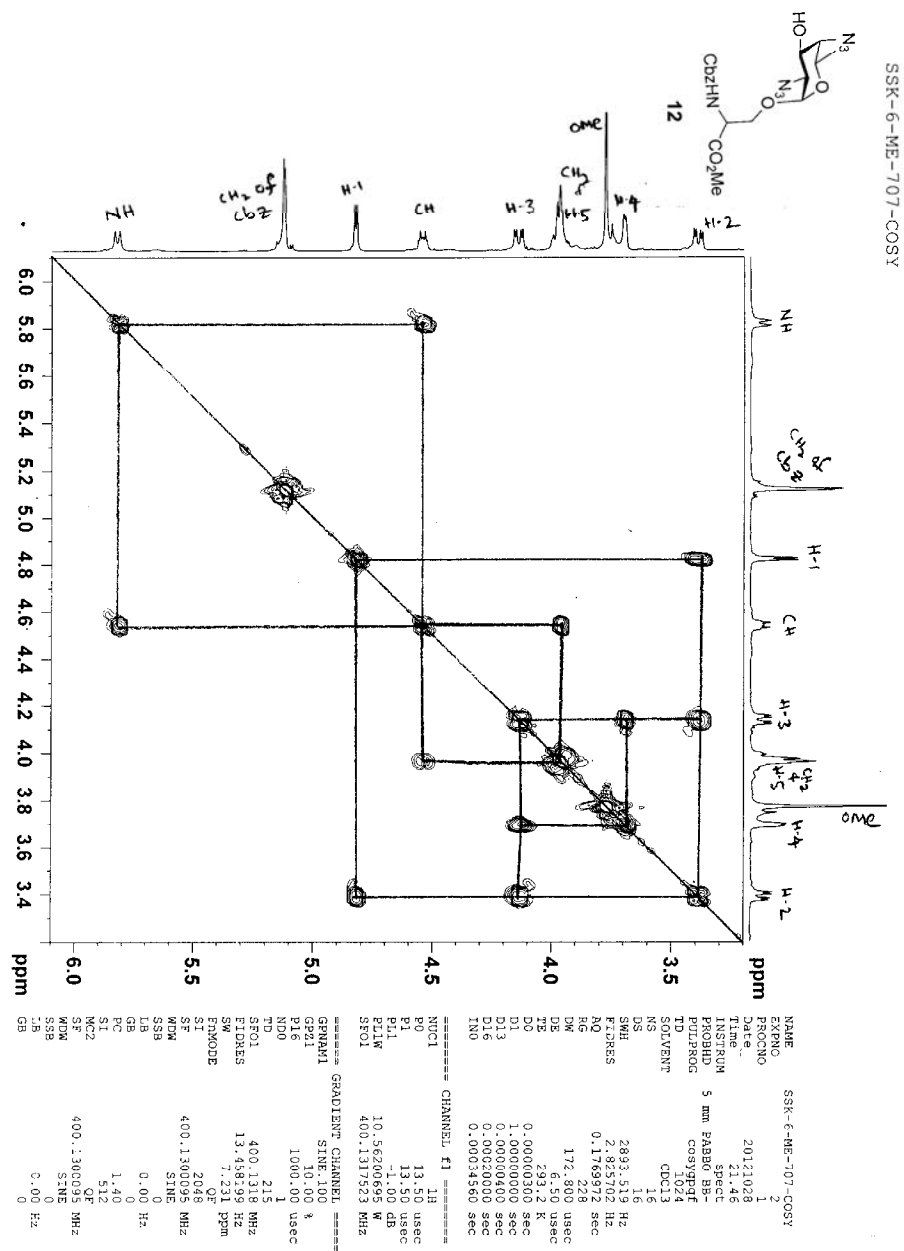

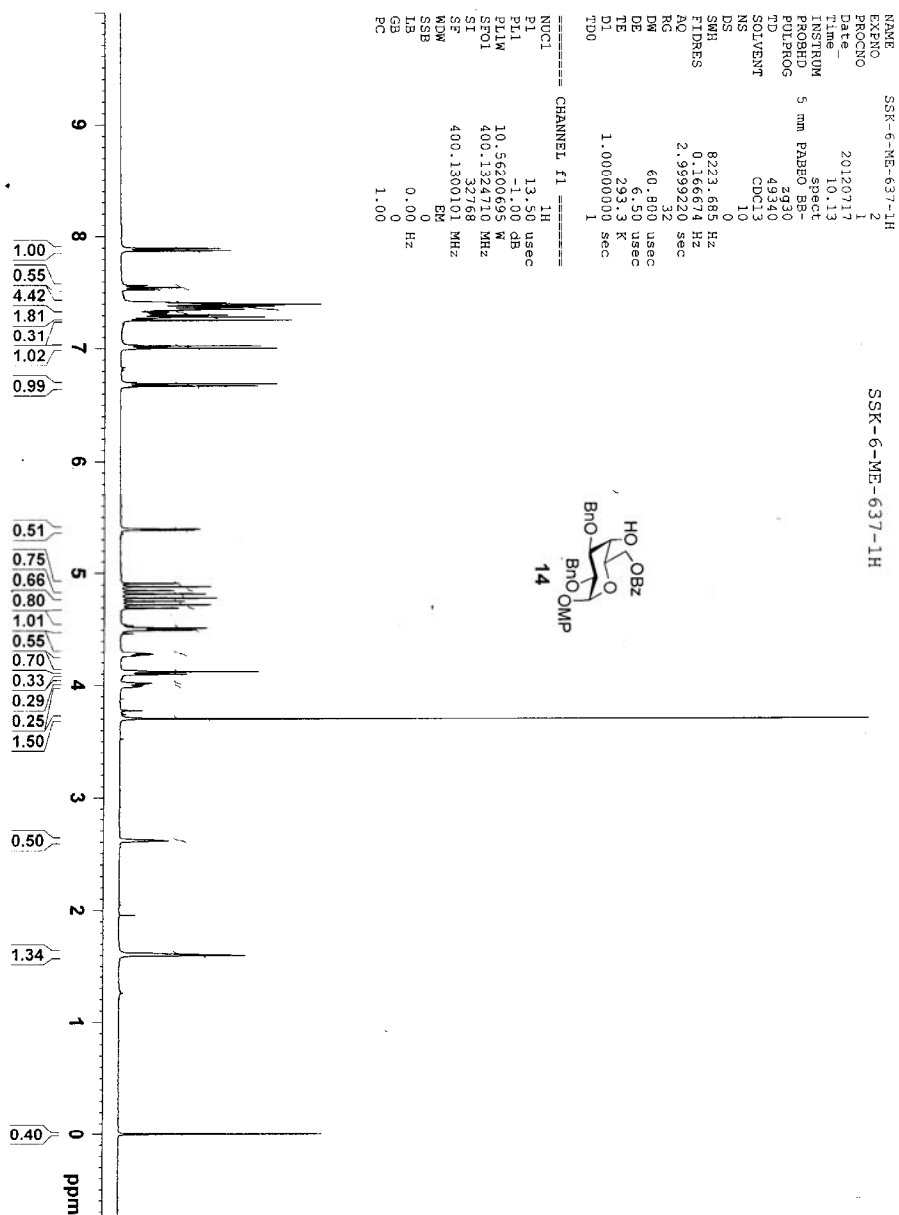

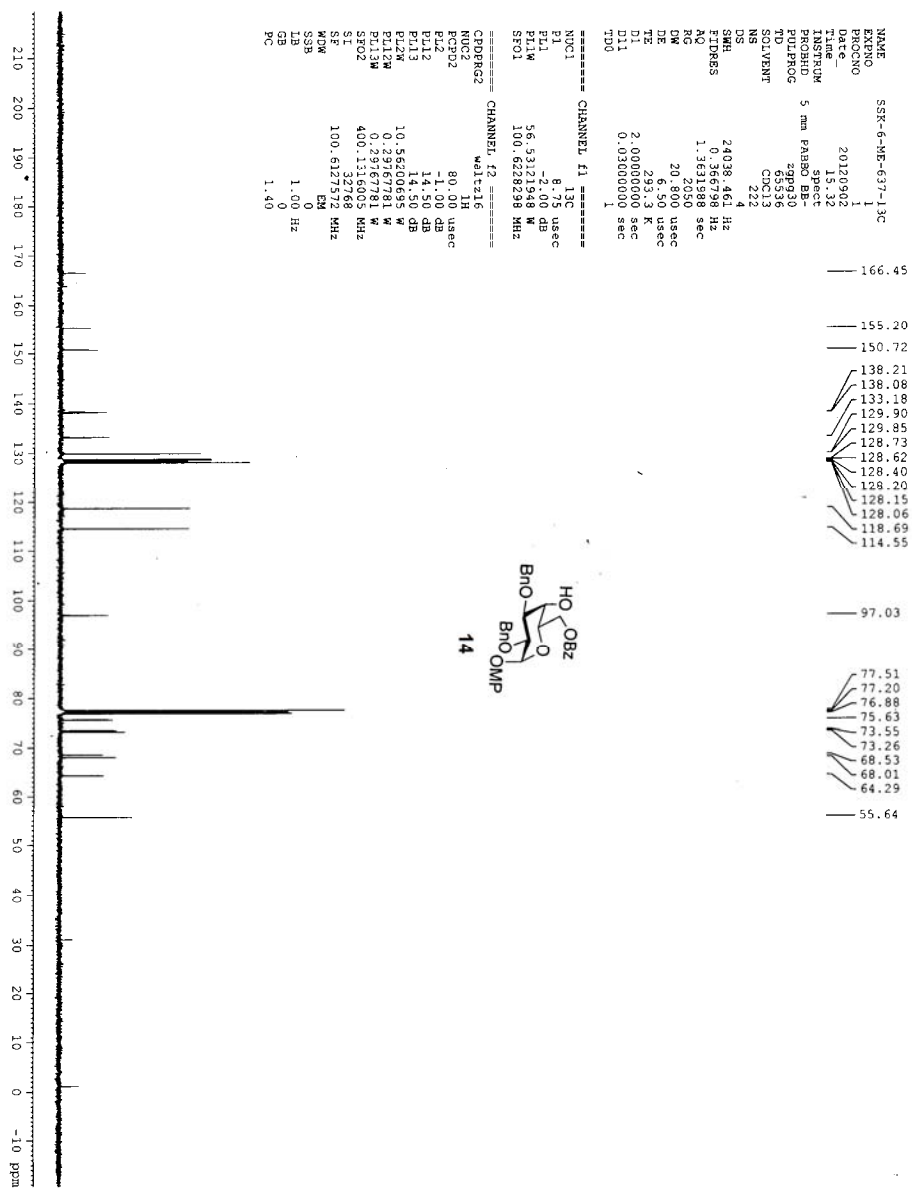

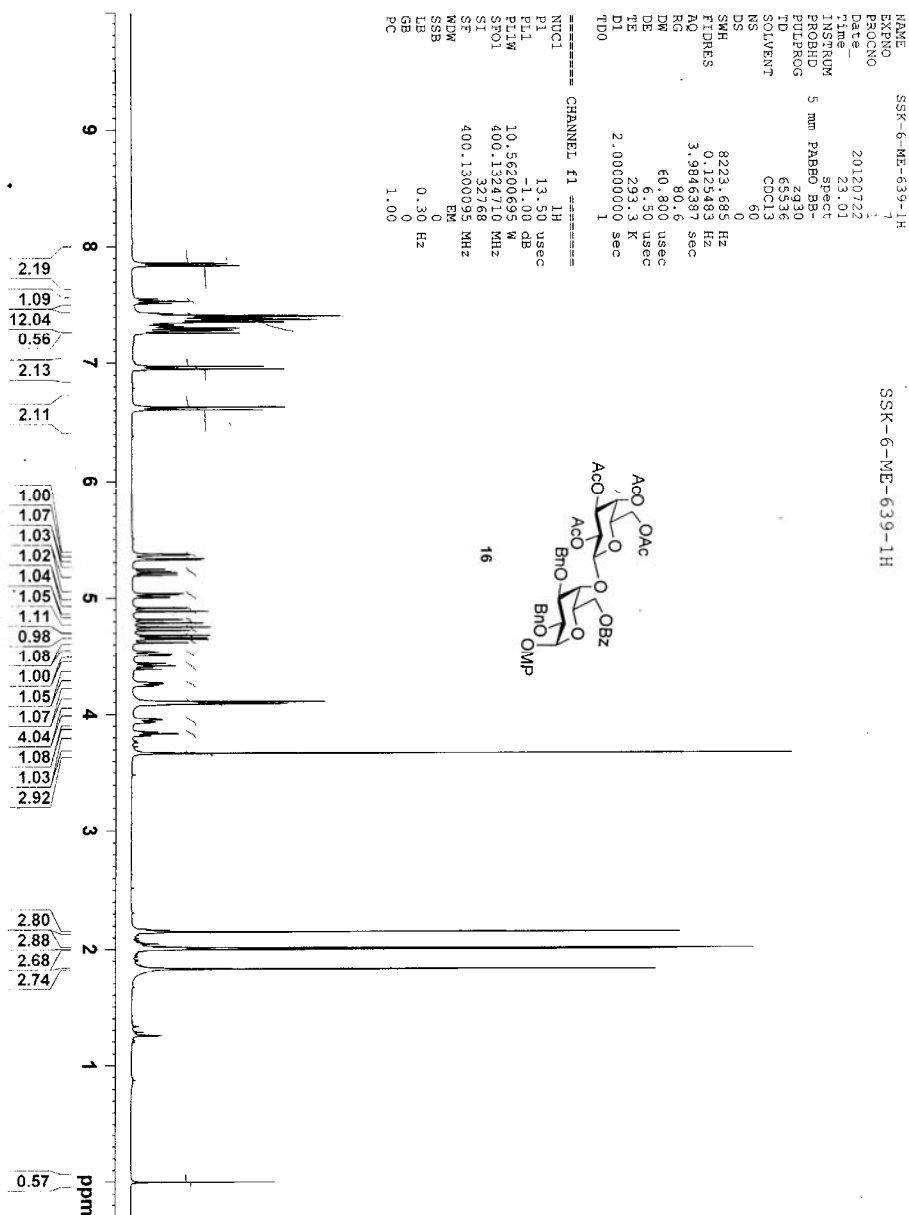

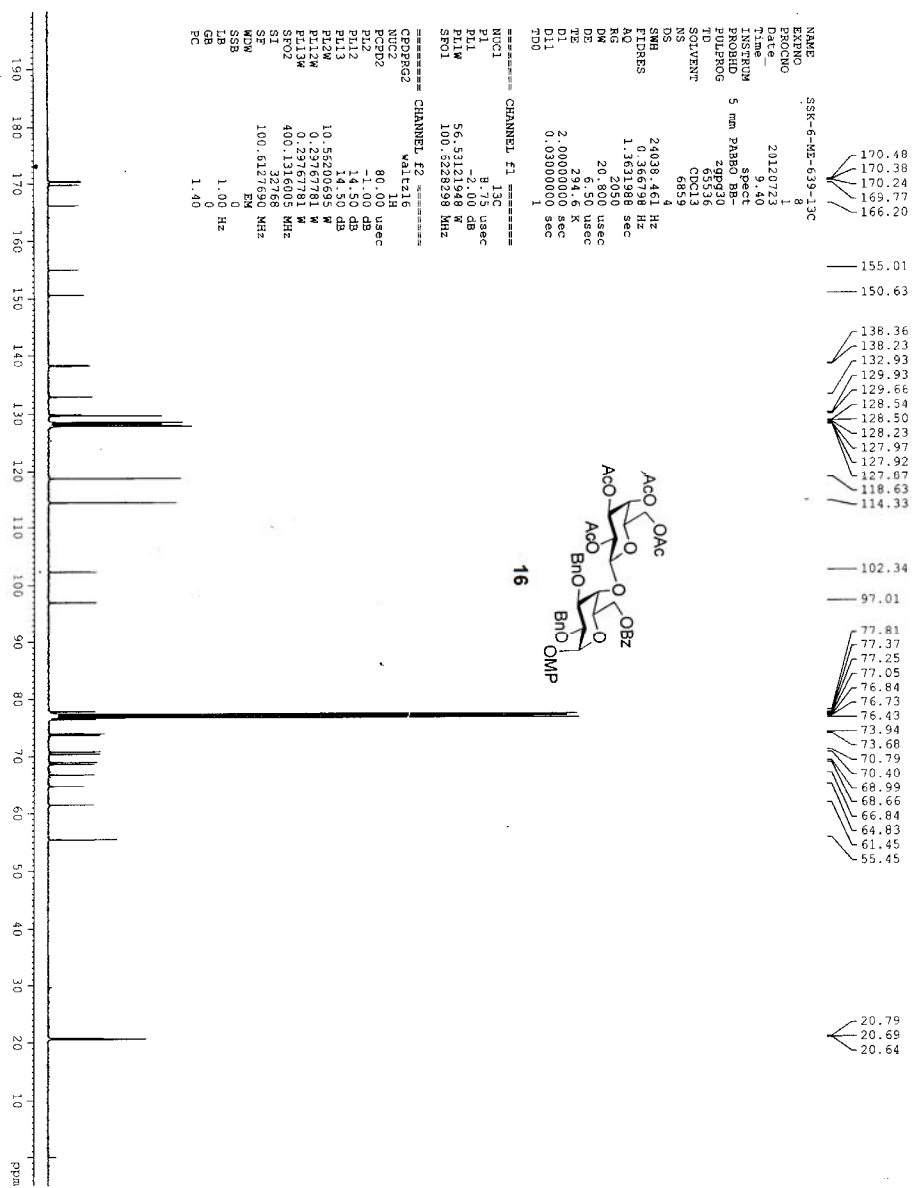

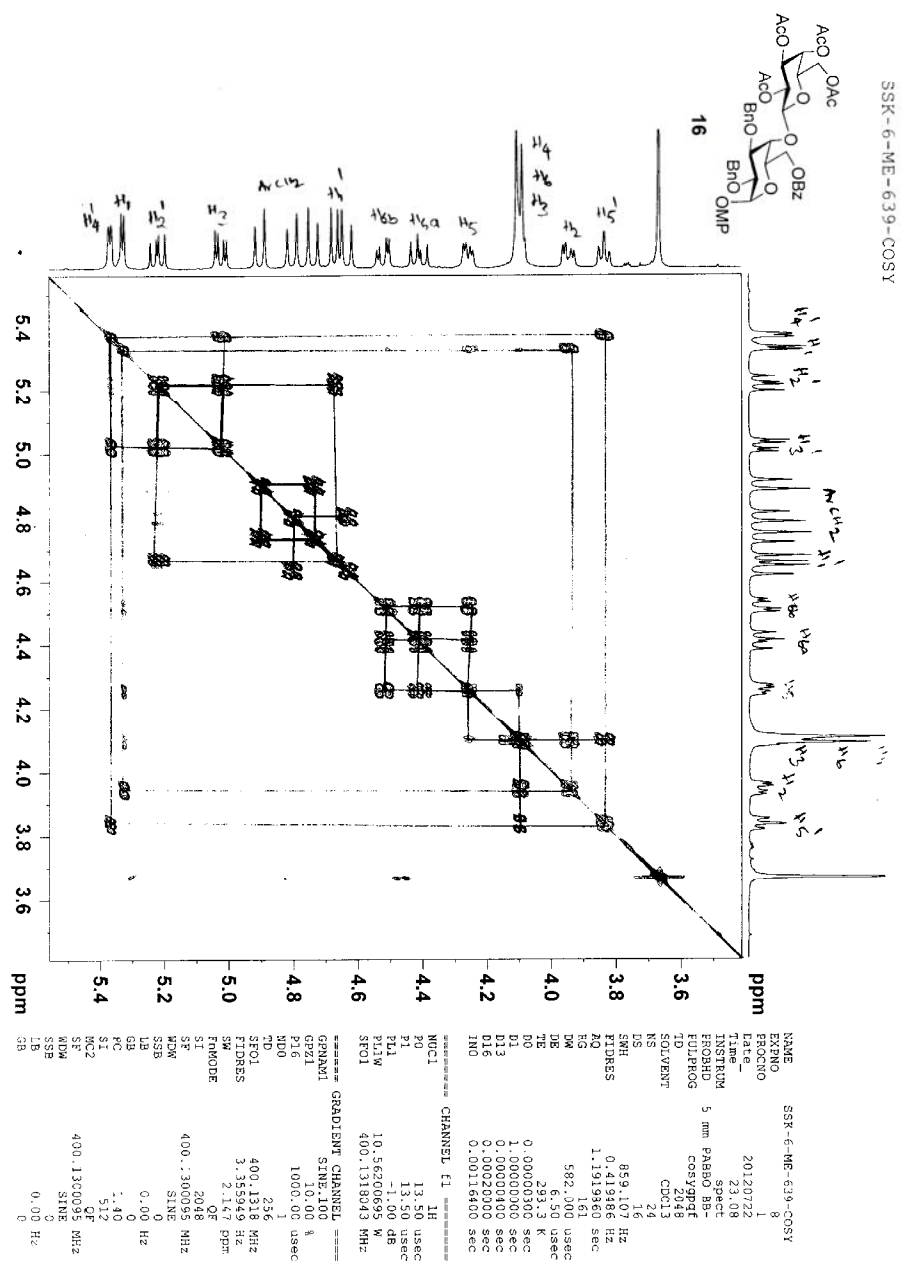

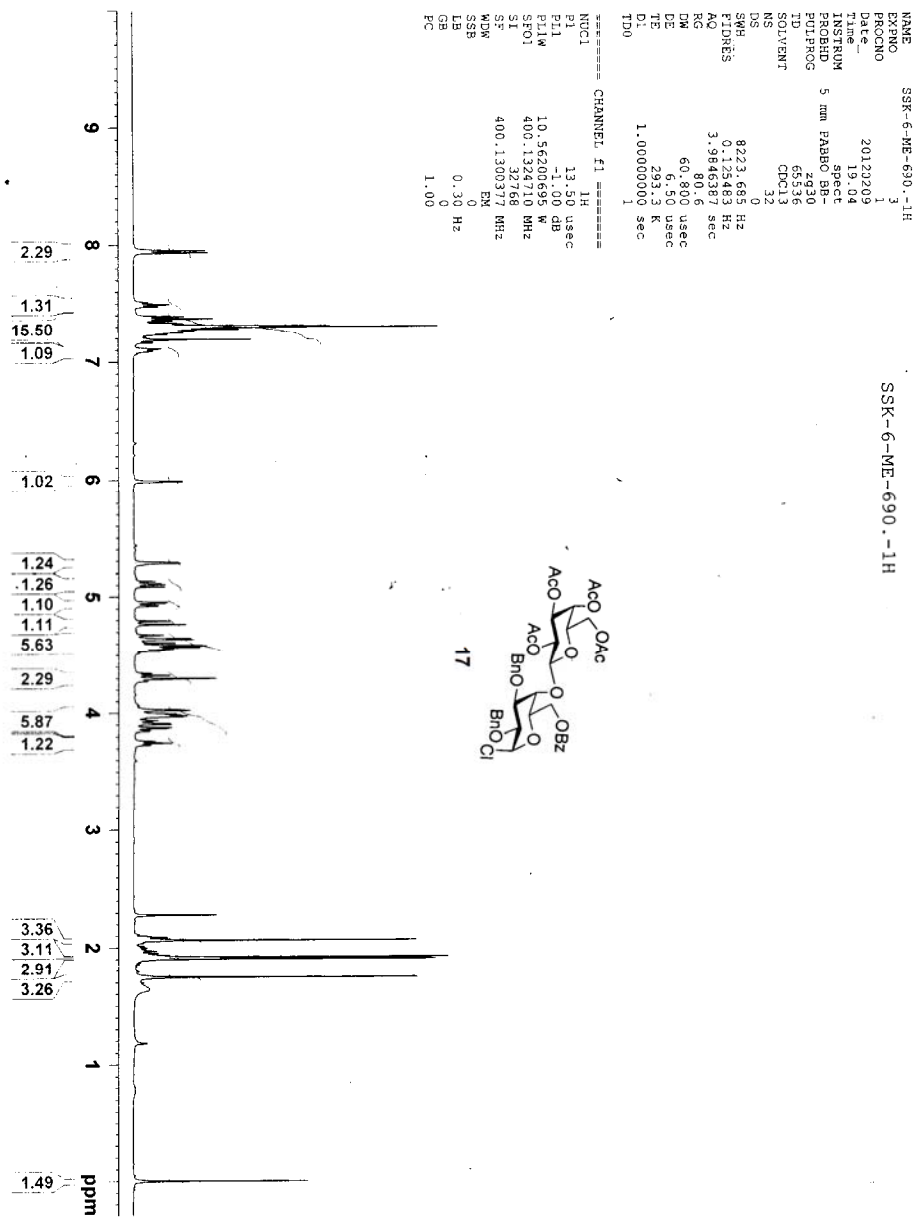



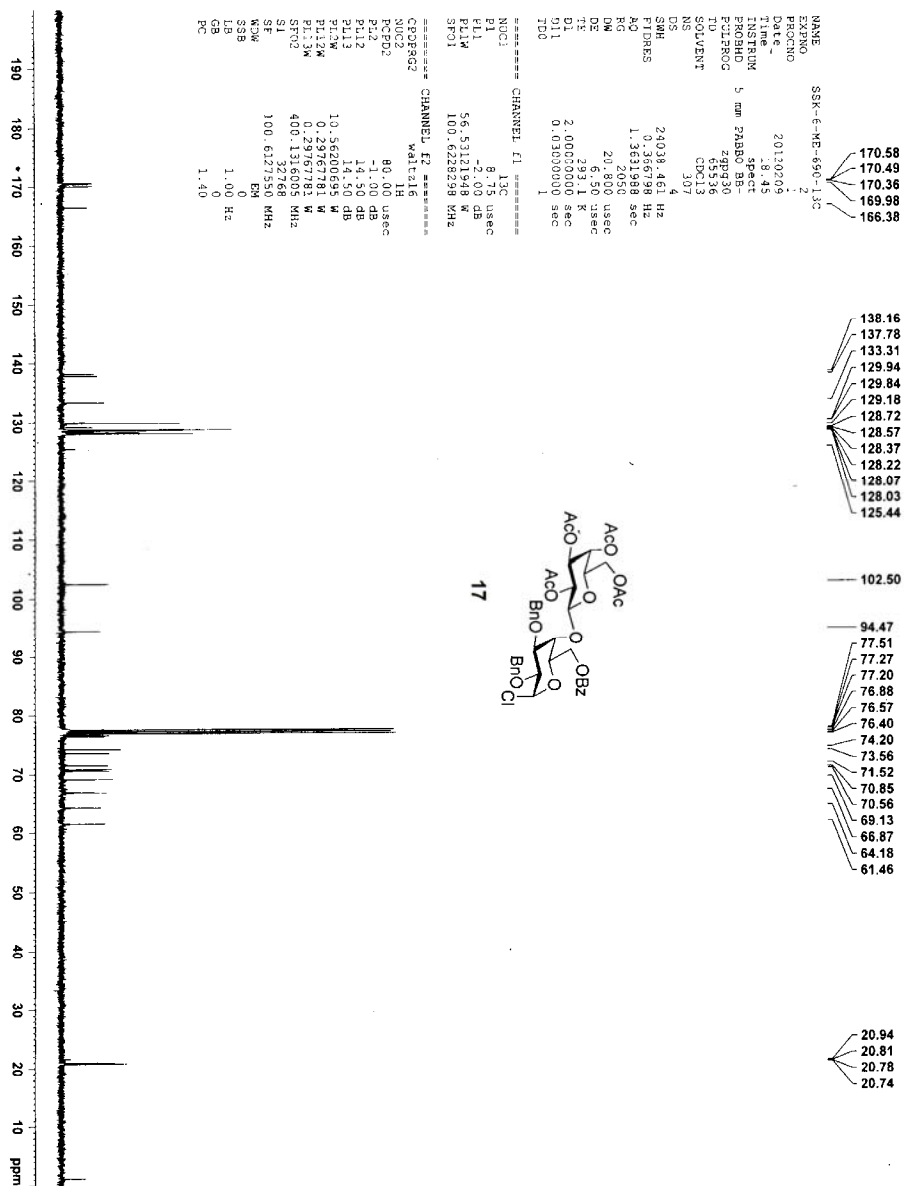

SSK-6-ME-690-COSY

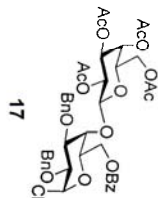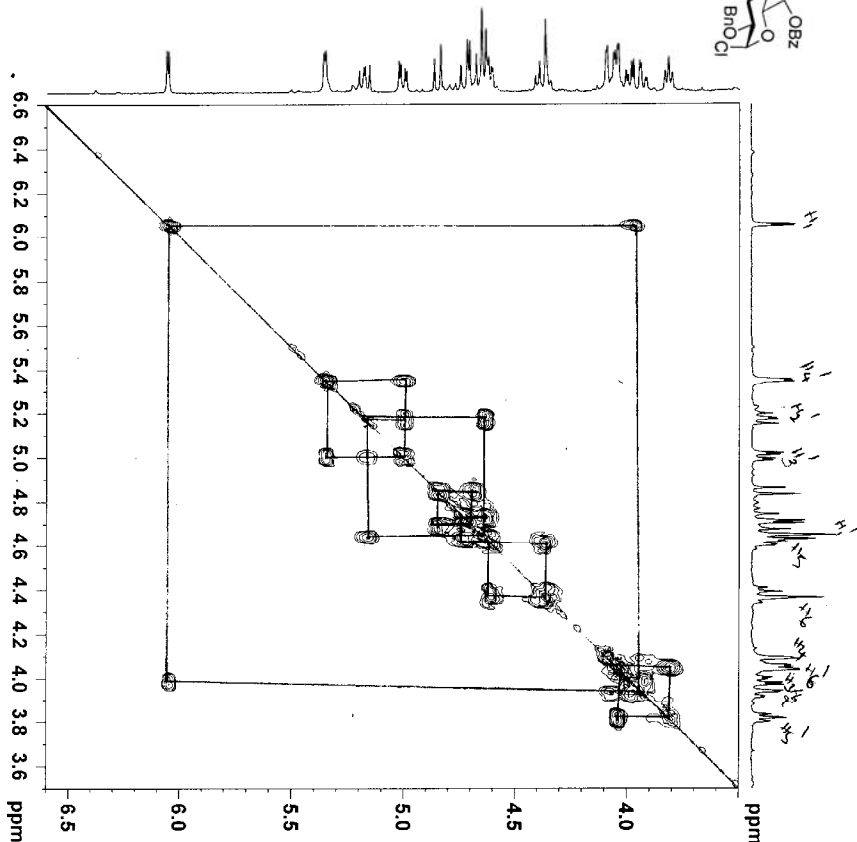

```

===== CHANNEL F1 =====
NAME          SSK-6-ME-690-COSY
EXPNO         2
PROCNO        1
Date_         20121024
Time          10.10
INSTRUM       5 mm PABBO-BB
PROBHD        COSY904
PULPROG       zgpg30
TD            65536
SOLVENT       CDCl3
NS            24
DS            16
SWH           3571.428 Hz
FIDRES       0.1481723 Hz
AQ           0.1431420 sec
RG           140.000 usec
DE           140.000 usec
TE           300.0 K
D0           0.00000000 sec
D1           0.00000000 sec
D16          0.00020000 sec
RG           0.00028000 sec

===== CHANNEL F2 =====
NUC1          1H
P1           12.50 usec
PL1          -1.00 dB
PL2          -1.00 dB
PL12         10.56206695 W
SFO1         400.1316430 MHz

===== GRADIENT CHANNEL =====
GMRW1        SINE,100 3
GMRW2        SINE,100 3
GMRW3        SINE,100 3
SFO1         400.1316 MHz
SFO2         13.950840 Hz
SFO3         8.926 ppm
SI           2056
SF           400.1300395 MHz
WDW          SINE
SSB          0
LB           0.00 Hz
GB           0
PC           1.40
SI           512
MC2          OF
SF           400.1300395 MHz
WDW          SINE
SSB          0
LB           0.00 Hz
GB           0
PC           1.40
SI           512
MC2          OF
SF           400.1300395 MHz
WDW          SINE
SSB          0
LB           0.00 Hz
GB           0
PC           1.40
SI           512
MC2          OF

```

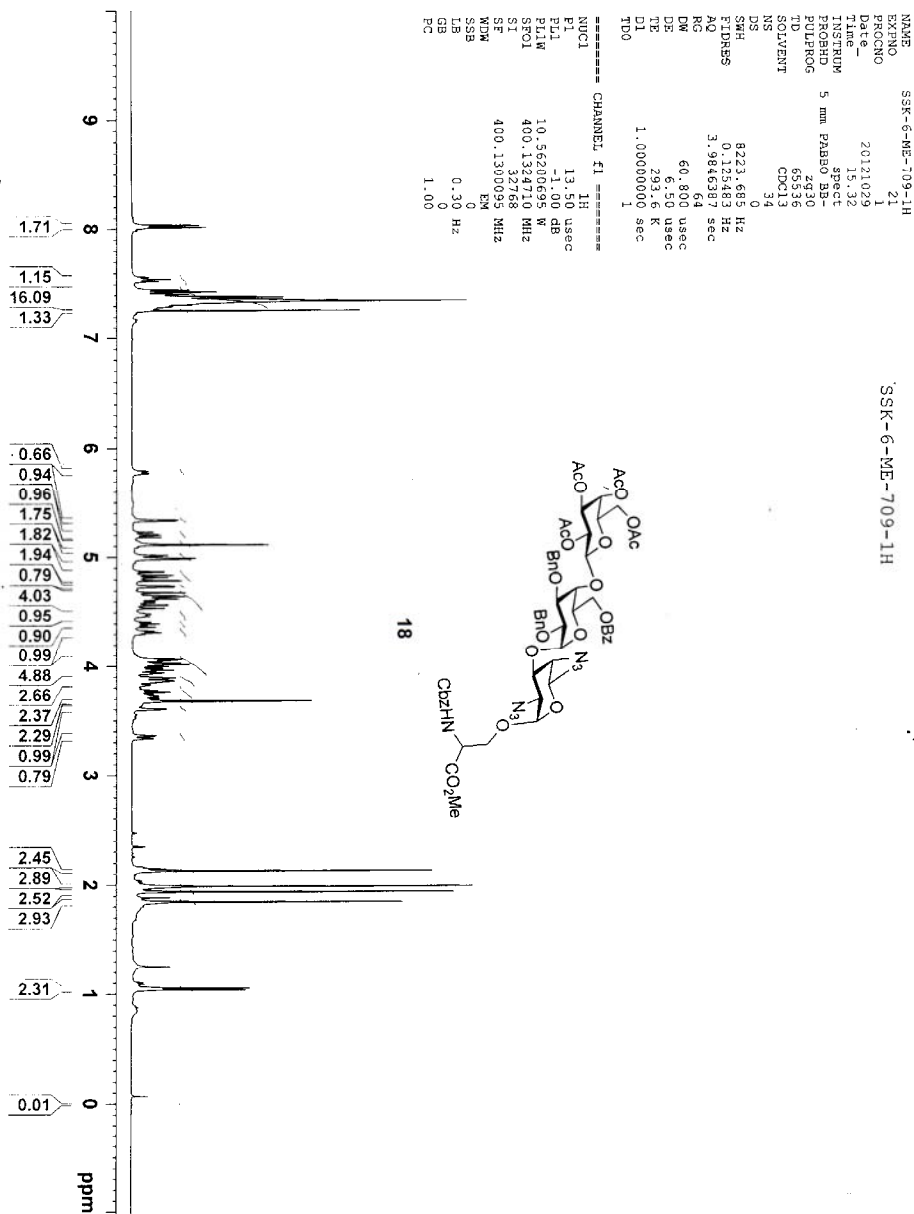

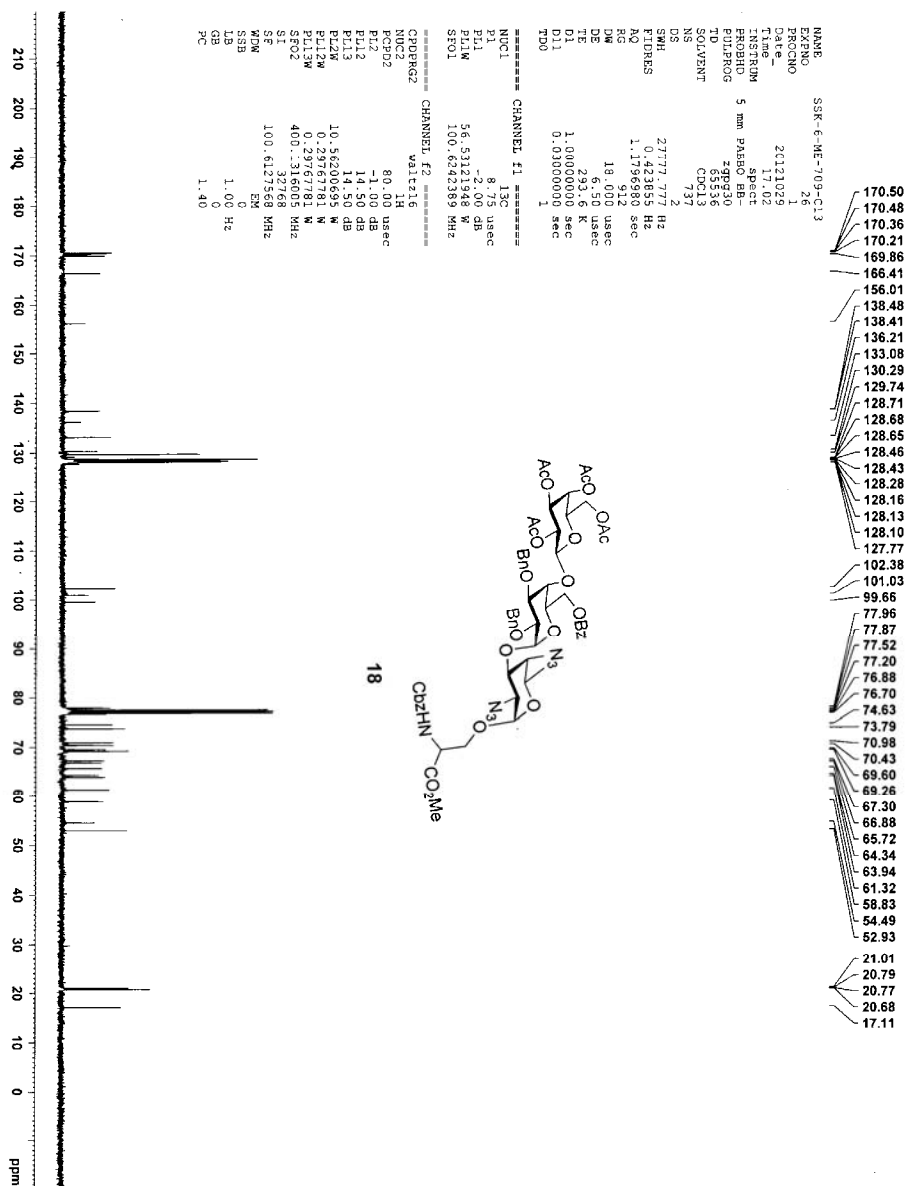



SSK-6-ME-709-COSY

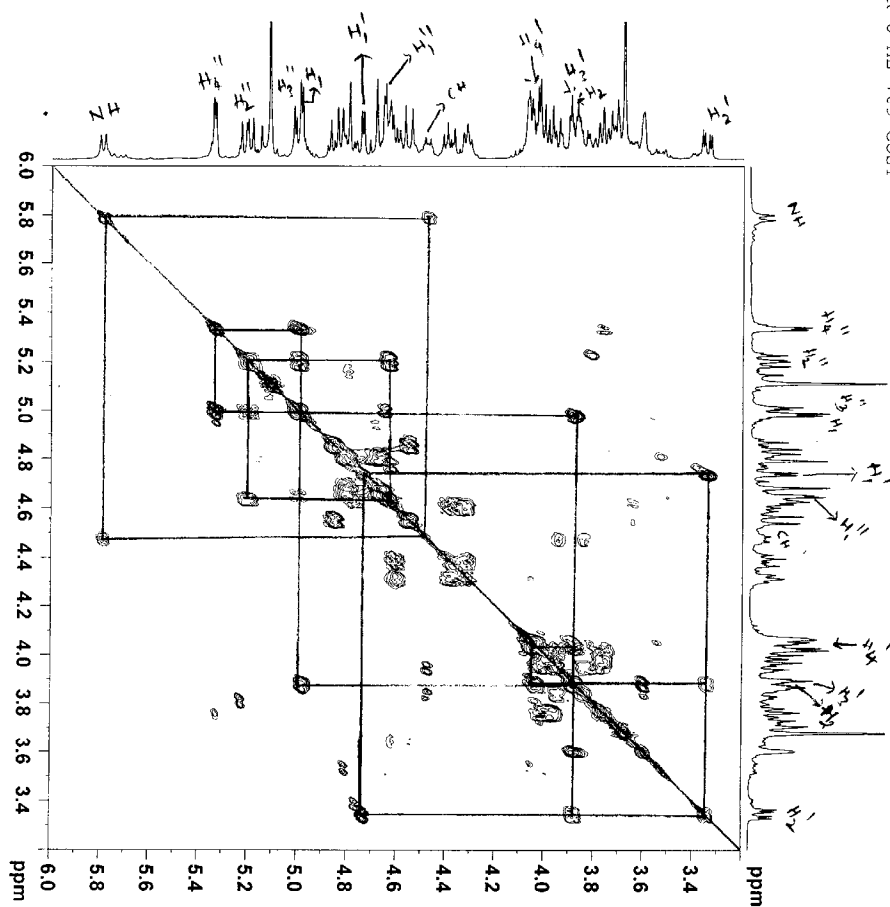

```

NAME SSK-6-ME-709-COSY
EXPNO 100
PROCNO 1
Date_ 20120918
Time 0.31
INSTRUM spect
PROBHD 5 mm PABBO BB-
PULPROG zgpg30
TD 65536
SFO 400.1300095 MHz
WDW SINE
SSB 0
LB 0.00 Hz
GB 0
PC 1.40
SI 112
SF 400.1300095 MHz
AQ 0.00 Hz
WDW SINE
SSB 0
SF 400.1300095 MHz
AQ 0.00 Hz
  
```

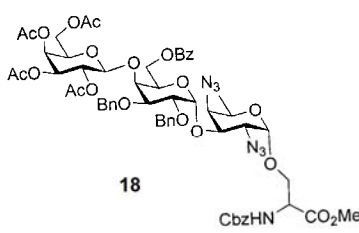

```

NAME SSK-6-ME-709-COSY
EXPNO 100
PROCNO 1
Date_ 20120918
Time 0.31
INSTRUM spect
PROBHD 5 mm PABBO BB-
PULPROG zgpg30
TD 65536
SFO 400.1300095 MHz
WDW SINE
SSB 0
LB 0.00 Hz
GB 0
PC 1.40
SI 112
SF 400.1300095 MHz
AQ 0.00 Hz
WDW SINE
SSB 0
SF 400.1300095 MHz
AQ 0.00 Hz
  
```

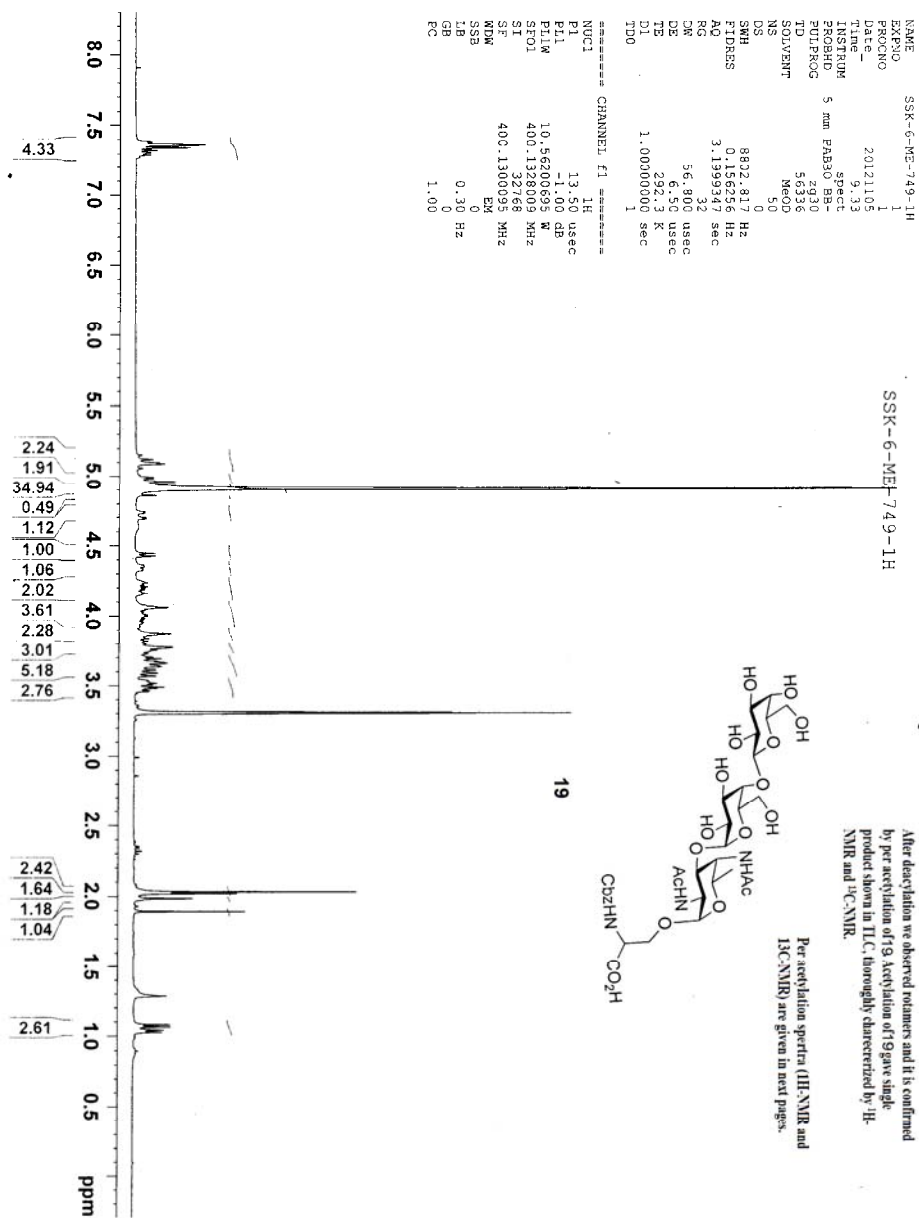

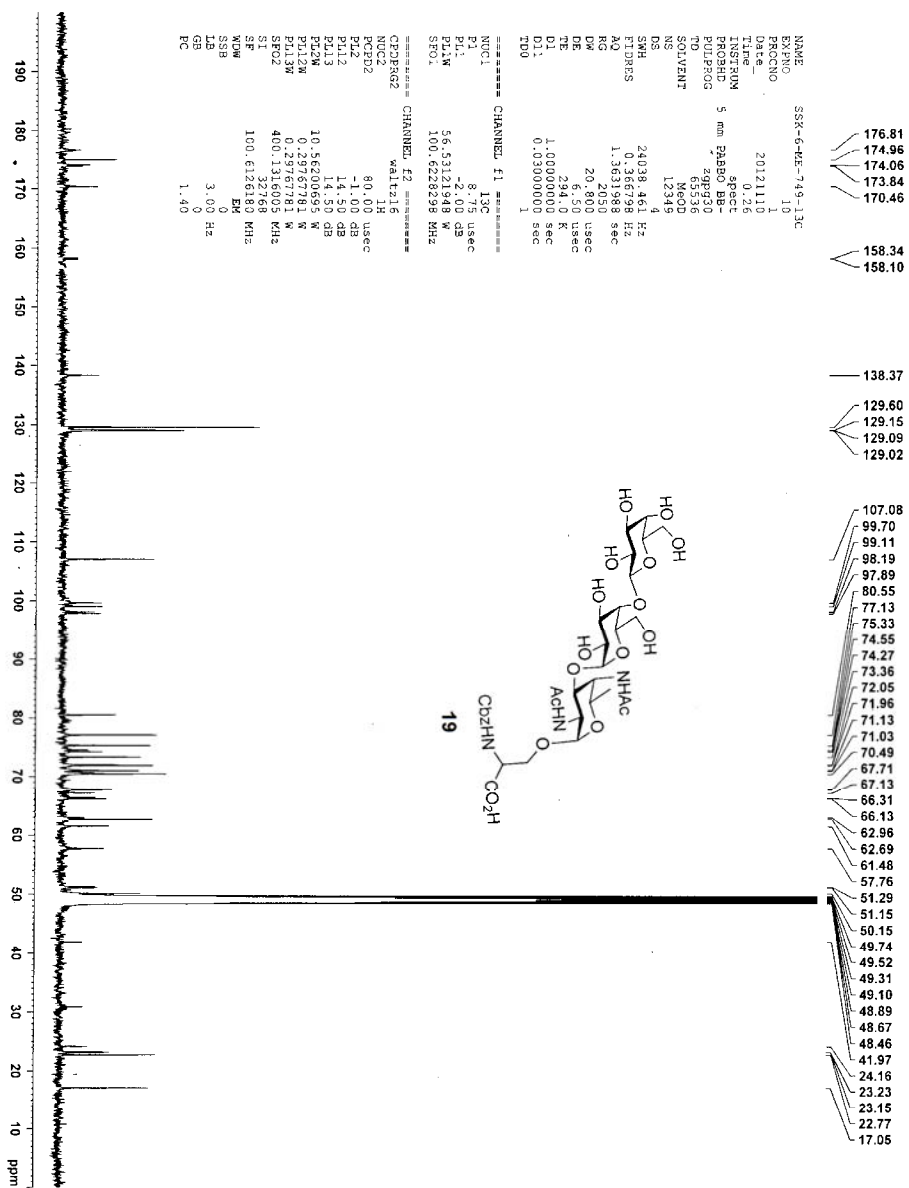



### Elemental Composition Report

Page 1

#### Single Mass Analysis (displaying only valid results)

Tolerance = 20.0 PPM / DBE: min = -1.5, max = 200.0

Isotope cluster parameters: Separation = 1.0 Abundance = 1.0%

Monoisotopic Mass, Odd and Even Electron Ions

307 formula(e) evaluated with 1 results within limits (all results (up to 1000) for each mass)

Waters(Micromass) : Q-ToF micro(YA-105)

Dept. Of Chemistry - I.I.T.(B)

21-Dec-201223:54:18

C33H49N3O19

SSK-6-ME-749 40 (0.400) AM (Cen,4, 80.00, Ht,5000.0,556.28,1.00); Sm (Md, 6.00); Sb (5,40.00 ); Cm (28:41)

TOF MS ES+

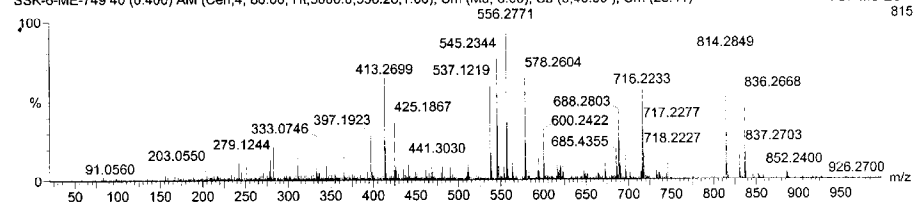

Minimum: 50.0 20.0 -1.5  
Maximum: 200.0

| Mass     | Calc. Mass | mDa  | PPM  | DBE  | Score | Formula           |
|----------|------------|------|------|------|-------|-------------------|
| 814.2849 | 814.2858   | -0.9 | -1.2 | 10.5 | 1     | C33 H49 N3 O19 Na |

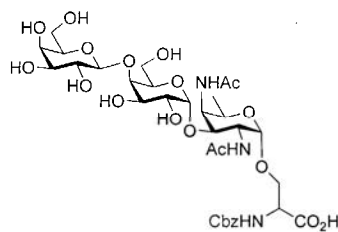

19

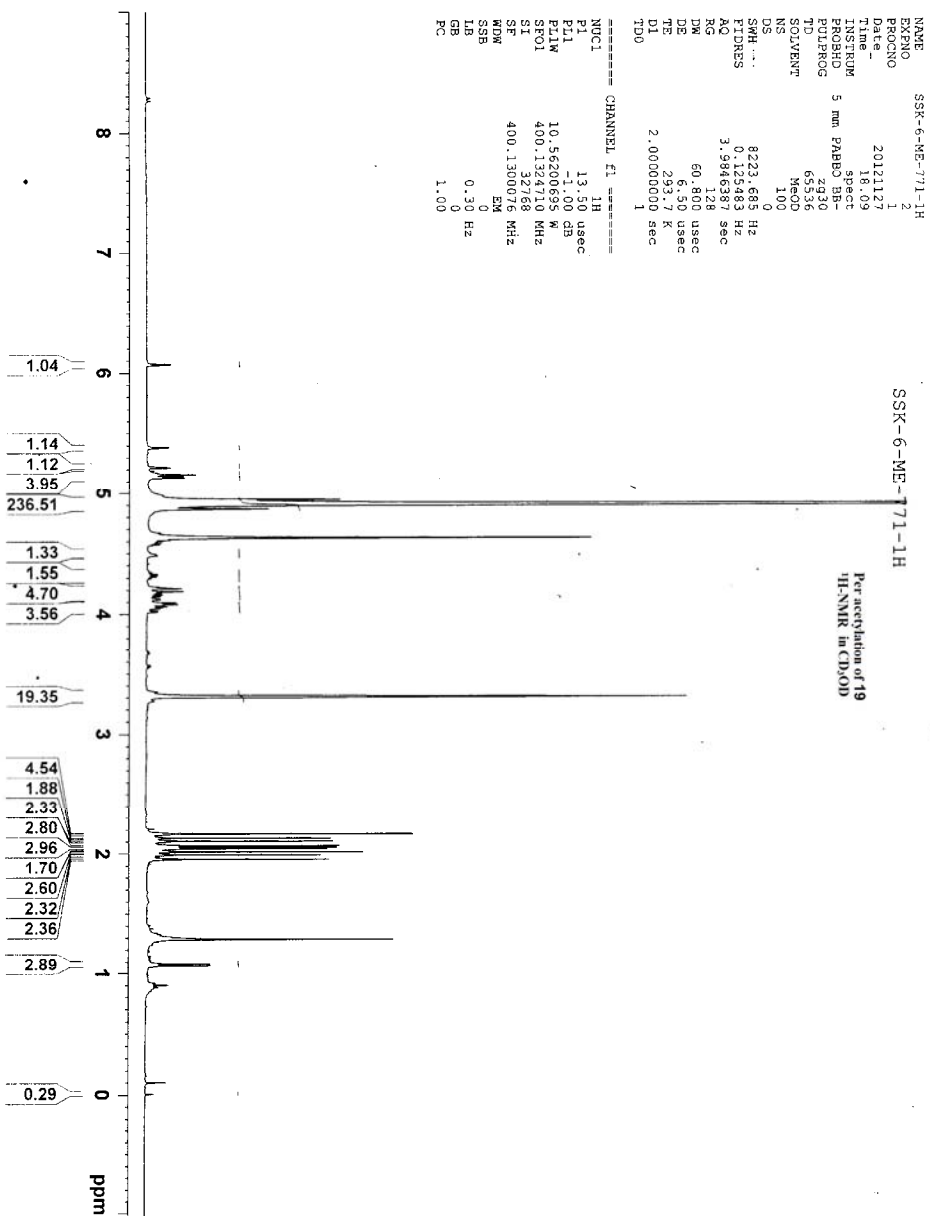

Supplement: c3ob40615f.pdf [file c3ob40615f.pdf]
